1 **A global view of aging and Alzheimer's pathogenesis-associated cell population dynamics and**  
2 **molecular signatures in the human and mouse brains**

3  
4

5 **Authors:** Andras Sziraki<sup>1,2,7</sup>, Ziyu Lu<sup>1,2,7</sup>, Jasper Lee<sup>1,7</sup>, Gabor Banyai<sup>1</sup>, Sonya Anderson<sup>3</sup>, Abdullaouf  
6 Abdullaouf<sup>1,4</sup>, Eli Metzner<sup>1,5</sup>, Andrew Liao<sup>1,4</sup>, Alexander Epstein<sup>1,2</sup>, Zihan Xu<sup>1,2</sup>, Zehao Zhang<sup>1,2</sup>, Li Gan<sup>6</sup>,  
7 Peter T. Nelson<sup>3</sup>, Wei Zhou<sup>1,8\*</sup>, Junyue Cao<sup>1,8,9\*</sup>

8  
9

9 **Affiliations:**

10 <sup>1</sup>Laboratory of Single Cell Genomics and Population Dynamics, The Rockefeller University, New York, NY,  
11 USA

12 <sup>2</sup>The David Rockefeller Graduate Program in Bioscience, The Rockefeller University, New York, NY, USA

13 <sup>3</sup>Department of Pathology and Sanders-Brown Center on Aging, University of Kentucky, Lexington, KY

14 <sup>4</sup>The Tri-Institutional M.D-Ph.D Program, New York, NY, USA

15 <sup>5</sup>The Tri-Institutional Ph.D. Program in Computational Biology & Medicine, New York, NY, USA

16 <sup>6</sup>Helen & Robert Appel Alzheimer's Disease Research Institute, Weill Cornell Medicine, New York, NY,  
17 USA

18 <sup>7</sup>These authors contributed equally

19 <sup>8</sup>Senior author

20 <sup>9</sup>Lead Contact

21 \*Correspondence: [wzhou@rockefeller.edu](mailto:wzhou@rockefeller.edu) (W.Z.), [jcao@rockefeller.edu](mailto:jcao@rockefeller.edu) (J.C.)

22

## 23 Summary

24 Although several studies have applied single-cell approaches to explore gene expression changes in aged  
25 brains, they were limited by the relatively shallow sampling of brain cell populations, and thus may have  
26 failed to capture aspects of the molecular signatures and dynamics of rare cell types associated with aging  
27 and diseases. Here, we set out to investigate the age-dependent dynamics of transcription and chromatin  
28 accessibility across diverse brain cell types. With *EasySci*, an extensively improved single-cell  
29 combinatorial indexing strategy, we profiled ~1.5 million single-cell transcriptomes and ~400,000 single-  
30 cell chromatin accessibility profiles across mouse brains spanning different ages, genotypes, and both  
31 sexes. With a novel computational framework designed for characterizing cellular subtypes based on the  
32 expression of both genes and exons, we identified > 300 cell subtypes and deciphered the underlying  
33 molecular programs and spatial locations of rare cell types (e.g., pinealocytes, tanycytes) and subtypes.  
34 Leveraging these data, we generate a global readout of age-dependent cell population dynamics with high  
35 cellular subtype resolution, providing insights into cell types that expand (e.g., rare astrocytes and vascular  
36 leptomeningeal cells in the olfactory bulb, reactive microglia and oligodendrocytes) or are depleted (e.g.,  
37 neuronal progenitors, neuroblasts, committed oligodendrocyte precursors) as age progresses.  
38 Furthermore, we explored cell-type-specific responses to genetic perturbations associated with  
39 Alzheimer's disease (AD) and identify rare cell types depleted (e.g., *mt-Cytb*<sup>+</sup>, *mt-Rnr2*<sup>+</sup> choroid plexus  
40 epithelial cells) or enriched (e.g., *Col25a1*<sup>+</sup>, *Ndr1*<sup>+</sup> interbrain and midbrain neurons) in both AD models.  
41 Key findings are consistent between males and females, validated across the transcriptome, chromatin  
42 accessibility, and spatial analyses. Finally, we profiled a total of 118,240 single-nuclei transcriptomes from  
43 twenty-four human brain samples derived from control and AD patients, revealing highly cell-type-specific  
44 and region-specific gene expression changes associated with AD pathogenesis. Critical AD-associated  
45 gene signatures were validated in both human and mice. In summary, these data comprise a rich resource  
46 for exploring cell-type-specific dynamics and the underlying molecular mechanisms in both normal and  
47 pathological mammalian aging.

48

## 49 Introduction

50

51 The mammalian brain is a remarkably complex system made up of millions to billions of highly  
52 heterogeneous cells, comprising a myriad of different cell types and subtypes (Erö et al., 2018; Zeisel et  
53 al., 2018). Progressive changes in brain cell populations, which occur during the normal aging process,  
54 may contribute to functional decline of the entire organ and increased risks for neurodegenerative diseases  
55 such as Alzheimer's disease (AD) (Mathys et al., 2019; Xia et al., 2018). While the recent advances in  
56 single-cell genomics have created unprecedented opportunities to explore the cell-type-specific dynamics  
57 across the entire mammalian brain in aging and AD models (Morabito et al., 2021; Tabula Muris  
58 Consortium, 2020; Wang et al., 2022; Ximerakis et al., 2019), most prior studies relied on a relatively  
59 shallow sampling of the brain cell populations, possibly resulting in poor sensitivity to investigate the  
60 dynamics of cell types during aging, particularly with respect to rare aging or AD-associated cell types.  
61 While providing proof of key concepts, these prior studies were also technically limited in several ways,  
62 including failing to recover isoform-level gene expression patterns for rare cell types, providing few insights  
63 into how the chromatin landscape regulates cell-type-specific alterations across aging stages, and often  
64 lacked integrative analyses with spatial visualization to explore the anatomic region-specific changes.

65

66 We previously developed single-cell RNA sequencing by combinatorial indexing, a methodological  
67 framework involving split-pool barcoding of cells or nuclei for single-cell transcriptome profiling (Cao et al.,  
68 2017). While the method has been widely used to study embryonic and fetal tissues (Cao et al., 2019,  
69 2020), it remains restricted to gene quantification proximal to the 3' end (*i.e.*, full-length transcript isoform  
70 information is lost) and is limited in terms of efficiency and cell recovery (up to 95% cell loss rate) (Cao et  
71 al., 2019), which pose a challenge when dealing with aged tissues. We have now performed over 350  
72 optimization experiments to overcome the above limitations (representative examples are shown in **Figure**  
73 **S1 and S2; Methods**). Several test conditions were inspired by optimizations described in recently  
74 developed or optimized single-cell techniques (Ma et al., 2020; Martin et al., 2021). The major  
75 improvements of the resulting method, *EasySci-RNA* (**Figure 1A**), include: (i) *one million* single-cell  
76 transcriptomes prepared at a library preparation cost of around \$700, less than 1/100 the cost of the  
77 commercial platforms (Ding et al., 2020) (**Figure 1B and 1C**). Of note, this cost mainly includes the  
78 reagents cost for scRNA-seq library preparation and does not include the cost of personnel or sequencing;  
79 (ii) nuclei are deposited to different wells for reverse transcription with indexed oligo-dT and random  
80 hexamer primers (*i.e.*, different molecular barcodes to separate reads primed by two types of primers and  
81 across different wells), thus recovering cell-type-specific gene expression with full gene body coverage  
82 (**Figure 1D**); (iii) chemically modified oligos were included in the ligation reaction to prevent the formation  
83 of primer-dimers and increase the detection efficiency (**Figure S2**); (iv) cell recovery rate, as well as the  
84 number of transcripts detected per cell, were significantly improved through optimized nuclei storage and  
85 enzymatic reactions (**Figure S2**). The optimized technique yields significantly higher signals per nucleus  
86 compared with the original sci-RNA-seq3 protocols as well as the popular commercial platform (*i.e.*, 10x  
87 Genomics) (**Figure 1E; Figure S2N-O**); (v) An extensively improved single-cell data processing pipeline  
88 was developed for both gene counting and exonic counting utilizing paired-end single-cell RNA sequencing  
89 data (**Methods**).

90

91 Leveraging the technical innovations during the development of *EasySci-RNA*, we further optimized the  
92 recently published single-cell chromatin accessibility profiling method by combinatorial indexing (sci-  
93 ATAC-seq3) (Cusanovich et al., 2018; Domcke et al., 2020). Critical additional improvements include: (i)

94 tagmentation reaction with indexed Tn5 that are fully compatible with indexed ligation primers of *EasySci-*  
95 *RNA*; (ii) a modified nuclei extraction and cryostorage procedure to further increase the reaction efficiency  
96 and signal specificity (**Figure S3**). The detailed protocols for the *EasySci* method (RNA and ATAC), as  
97 well as the data processing pipeline, are both included as supplementary files (**Supplementary file 1-6**)  
98 to facilitate the uptake of the techniques to further enable individual laboratories to cost-efficiently generate  
99 gene expression and chromatin accessibility profiles from millions of single cells.

100

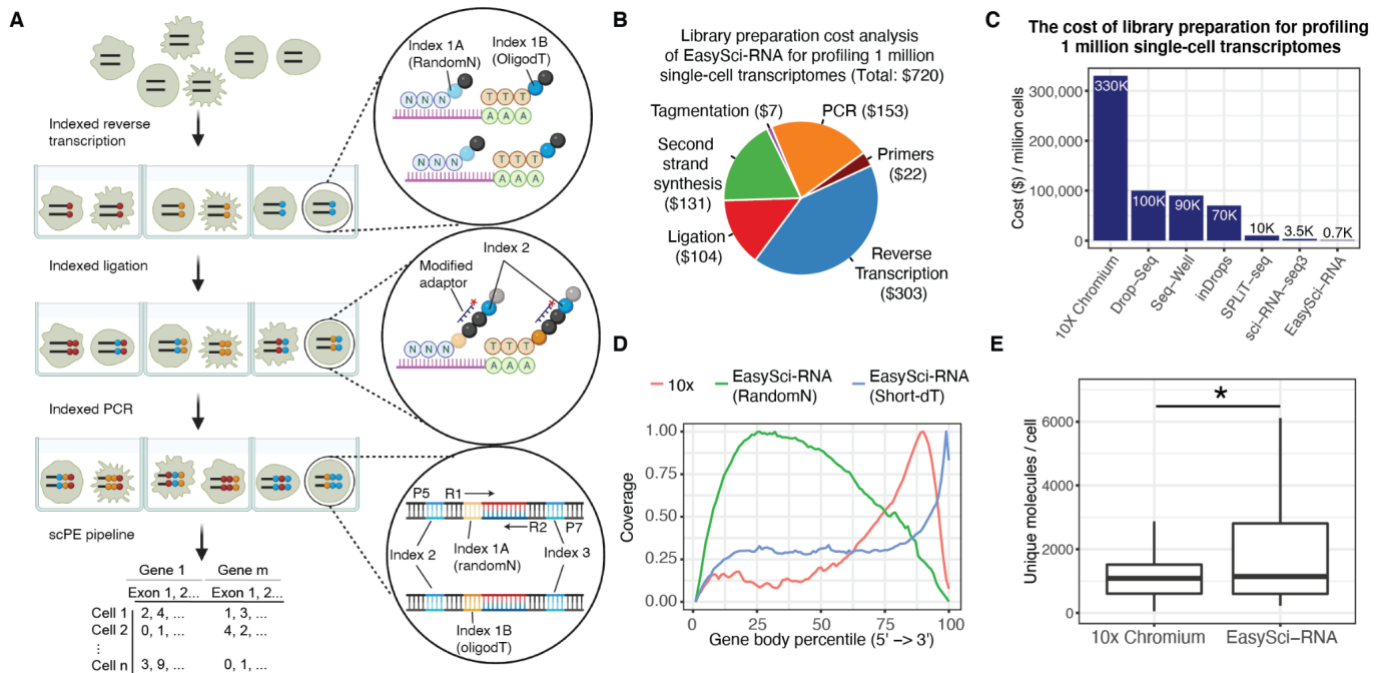

**Figure 1. EasySci-RNA enables high-throughput and low-cost single-cell transcriptome profiling with full gene body coverage.**

(A) EasySci-RNA workflow. Key steps are outlined in the texts.

(B) Pie chart showing the estimated cost compositions of library preparation for profiling 1 million single-nucleus transcriptomes using EasySci-RNA.

(C) Bar plot comparing different single-cell RNA-seq methods in terms of their cost of the library preparation for 1 million single-nucleus transcriptomes. The cost of sci-RNA-seq3 and SPLiT-seq were calculated using data from (Martin et al., 2021; Rosenberg et al., 2018). The cost of other techniques was calculated using data from (Ding et al., 2020).

(D) Density plot showing the gene body coverage comparing single-cell transcriptome profiling using 10x genomics and EasySci-RNA. Reads from indexed oligo-dT priming and random hexamers priming are plotted separately for EasySci-RNA.

(E) Box plot showing the number of unique transcripts detected per mouse brain nucleus comparing 10x genomics and an EasySci-RNA library at similar sequencing depth (~ 4,450 raw reads/cell, Methods). For the box plot: middle lines, medians; upper and lower box edges, first and third quartiles, respectively; whiskers, 1.5 times the interquartile range. The star indicates p-value < 0.05 using a Wilcoxon rank-sum test.

101  
102  
103  
104  
105  
106  
107  
108  
109  
110  
111  
112  
113  
114  
115  
116  
117  
118  
119

## 120 **A comprehensive single-cell catalog of the mouse brain in Aging and AD**

121

122 We first applied the *EasySci* method to characterize cell-type-specific gene expression, and chromatin  
123 accessibility across the entire mouse brain sampling at different ages, sexes, and genotypes (**Figure 2A**).  
124 We collected C57BL/6 wild-type mouse brains at three months (n=4), six months (n=4), and twenty-one  
125 months (n=4). To gain insight into the early molecular changes associated with the pathophysiology of AD,  
126 we included two AD models from the same C57BL/6 background at three months. These include an early-  
127 onset AD (EOAD) model (5xFAD) that overexpresses mutant human amyloid-beta precursor protein (APP)  
128 and human presenilin 1 (PS1) harboring multiple AD-associated mutations (Oakley et al., 2006); and a  
129 late-onset AD (LOAD) model (APOE\*4/Trem2\*R47H) that carries two of the highest risk factor mutations  
130 of LOAD, including a humanized ApoE knock-in allele and missense mutations in the mouse Trem2 gene  
131 (Desimone et al., 2021; Xiang et al., 2018).

132

133 Nuclei were first extracted from the whole brain, then deposited to different wells for indexed reverse  
134 transcription (*EasySci-RNA*) or transposition (*EasySci-ATAC*), such that the first index identified the  
135 originating sample and assay type of any given well. The resulting *EasySci* libraries were sequenced in  
136 two Illumina NovaSeq runs, yielding a total of 20 billion reads (around 10 billion for each library). After  
137 filtering out low-quality cells and potential doublets, we recovered gene expression profiles in 1,469,111  
138 single nuclei (a median of 70,589 nuclei per brain sample, **Figure S4A; Methods**) and chromatin  
139 accessibility profiles in 376,309 single nuclei (a median of 18,112 nuclei per brain sample, **Figure S4B;**  
140 **Methods**) across conditions. Despite shallow sequencing depth (~ 4500 and ~ 16,000 raw reads per cell  
141 for RNA and ATAC, respectively), we recovered an average of 1,788 UMIs (RNA, median of 935, 12.8%  
142 duplication rate) and 5,515 unique fragments (ATAC, median of 3,918, 9.3% duplication rate) per nucleus  
143 (**Figure S4C and S4D**), comparable to the published datasets (Cao et al., 2019, 2020; Domcke et al.,  
144 2020). A median of 19% of ATAC-seq reads was mapped to locations near the transcription start site ( $\pm 1$   
145 kb) (**Figure S4E**), comparable to the published sci-ATAC-seq3 approach (Domcke et al., 2020).

146

147 With UMAP visualization (McInnes et al., 2018) and Louvain clustering (Blondel et al., 2008), we identified  
148 31 main cell types by gene expression clusters (a median of 16,370 cells per cell type; **Figure 2C;**  
149 **Methods**), annotated based on cell-type-specific gene markers (Zeisel et al., 2018). Each cell type was  
150 observed in almost every individual, except the rare pituitary cells (0.09% of the cell population) that were  
151 missing in three out of twenty individuals (**Figure S5**). The cell-type-specific fractions in the global cell  
152 population are highly biased, ranging from 0.05% (Inferior olivary nucleus neurons) to 32.5% (Cerebellum  
153 granule neurons) (**Figure 2B**). An average of 74 marker genes were identified for each main cell type  
154 (defined as differentially expressed genes with at least a 2-fold difference between first and second-ranked  
155 cell types with respect to expression; FDR of 5%; and TPM > 50 in the target cell type; **Table S1**). In  
156 addition to the established marker genes, we identified many novel markers that were not previously  
157 associated with the respective cell types, such as markers for microglia (e.g., *Arhgap45* and *Wdfy4*),  
158 astrocytes (e.g., *Celrr* and *Adamts9*) and oligodendrocytes (e.g., *Sec14l5* and *Galnt5*) (**Figure S5B**).

159

160 We next sought to quantify isoform expression through a published computation pipeline (Booeshaghi et  
161 al., 2021). Briefly, we merged random hexamer reads from each cell type in every individual mouse brain,  
162 yielding 613 pseudocells. We then pseudo-aligned the merged reads to the mouse transcriptome using  
163 Kallisto (Bray et al., 2016), producing a raw isoform count matrix that was processed per the above  
164 pipeline. After filtering and normalization, we recovered abundance estimates for 33,361 isoforms



165 corresponding to 12,636 genes (**Methods**). As expected, the previously identified main clusters can be  
166 readily resolved through isoform expression (**Figure S6A**). Compared with single-cell RNA-seq libraries  
167 (Booeshaghi et al., 2021), a relatively lower fraction (~40%) of *EasySci-RNA* reads were mapped to  
168 transcriptome with the above pipeline, potentially due to the high fraction of intronic reads in single nucleus  
169 RNA sequencing. Nevertheless, we identified certain isoforms strongly expressed in a given cell type even  
170 though their corresponding genes are not cell-type-specific (**Table S2**). For example, *App-202*, an isoform  
171 of the amyloid precursor protein gene, is preferentially expressed in choroid plexus epithelial cells, while  
172 its corresponding gene is not (**Figure S6B**). Similarly, *Aplp2-209*, an isoform of the amyloid beta precursor-  
173 like protein 2 gene, is differentially expressed in oligodendrocytes, while its cell-type-specificity is not  
174 detected at the gene level (**Figure S6C**). The differential expression of *Aplp2-209* in oligodendrocytes is  
175 further validated using the Tabula Muris Senis mouse aging atlas dataset (Tabula Muris Consortium, 2020)  
176 (**Figure S6D**).  
177

178 To reconstruct a brain cell atlas of both gene expression and chromatin accessibility, we applied a deep  
179 learning-based strategy (Lin et al., 2022) to integrate the 376,309 single-cell chromatin accessibility profiles  
180 with gene expression data (**Figure 2C; Methods**), yielding all 31 main cell types defined by chromatin  
181 accessibility. The gene body accessibility and expression of marker genes across cell types were highly  
182 correlated (**Figure 2D**). The fraction of each cell type was highly consistent between two molecular  
183 measurements as well (**Figure 2E**). To gain more insight into the epigenetic controls of the diverse cell  
184 types in the brain, we next identified peaks of accessibility within each cell type, yielding a master set of  
185 339,951 peaks. There was a median of 34% of reads in peaks per nucleus. UMAP dimension reduction  
186 using the resulting peak count matrix readily separates main cell types, further validating the integration-  
187 based annotations (**Figure S7A**). Through differential accessibility (DA) analysis, we identified a median  
188 of 474 differential accessible peaks per cell type (FDR of 5%, TPM > 20 in the target cell type, **Figure S7B**  
189 **and S7C; Table S3**). Key cell-type-specific TF regulators were discovered by correlation analysis between  
190 motif accessibility and expression patterns across diverse cell types (**Figure S7D**), such as *Spi1* in  
191 microglia (Yeh and Ikezu, 2019), *Nr4a2* in cortical projection neurons 3 (Watakabe et al., 2007), and *Pou4f1*  
192 in inferior olivary nucleus neurons (McEvelly et al., 1996).  
193

194 As a step toward a spatially resolved brain atlas, we integrated our dataset with a *10x Visium* spatial  
195 transcriptomics dataset (Genomics, 2019a, 2019b, 2019c) through a modified non-negative least squares  
196 (NNLS) approach (**Methods**). Aggregated cell-type-specific gene expression data were used as input to  
197 decompose mRNA counts at individual spatial locations of both sagittal and coronal sections of the entire  
198 mouse brain, thereby estimating the cell-type-specific abundance across locations. As expected, specific  
199 brain cell types were mapped to distinct anatomical locations (**Figure 2F and 2G**), especially for region-  
200 specific cell types such as cortical projection neurons (Clusters 6,7,8), cerebellum granule neurons (Cluster  
201 3), and hippocampal dentate gyrus neurons (Cluster 9). The integration analysis further confirmed the  
202 annotations and spatial locations of main cell types in our single-cell datasets.

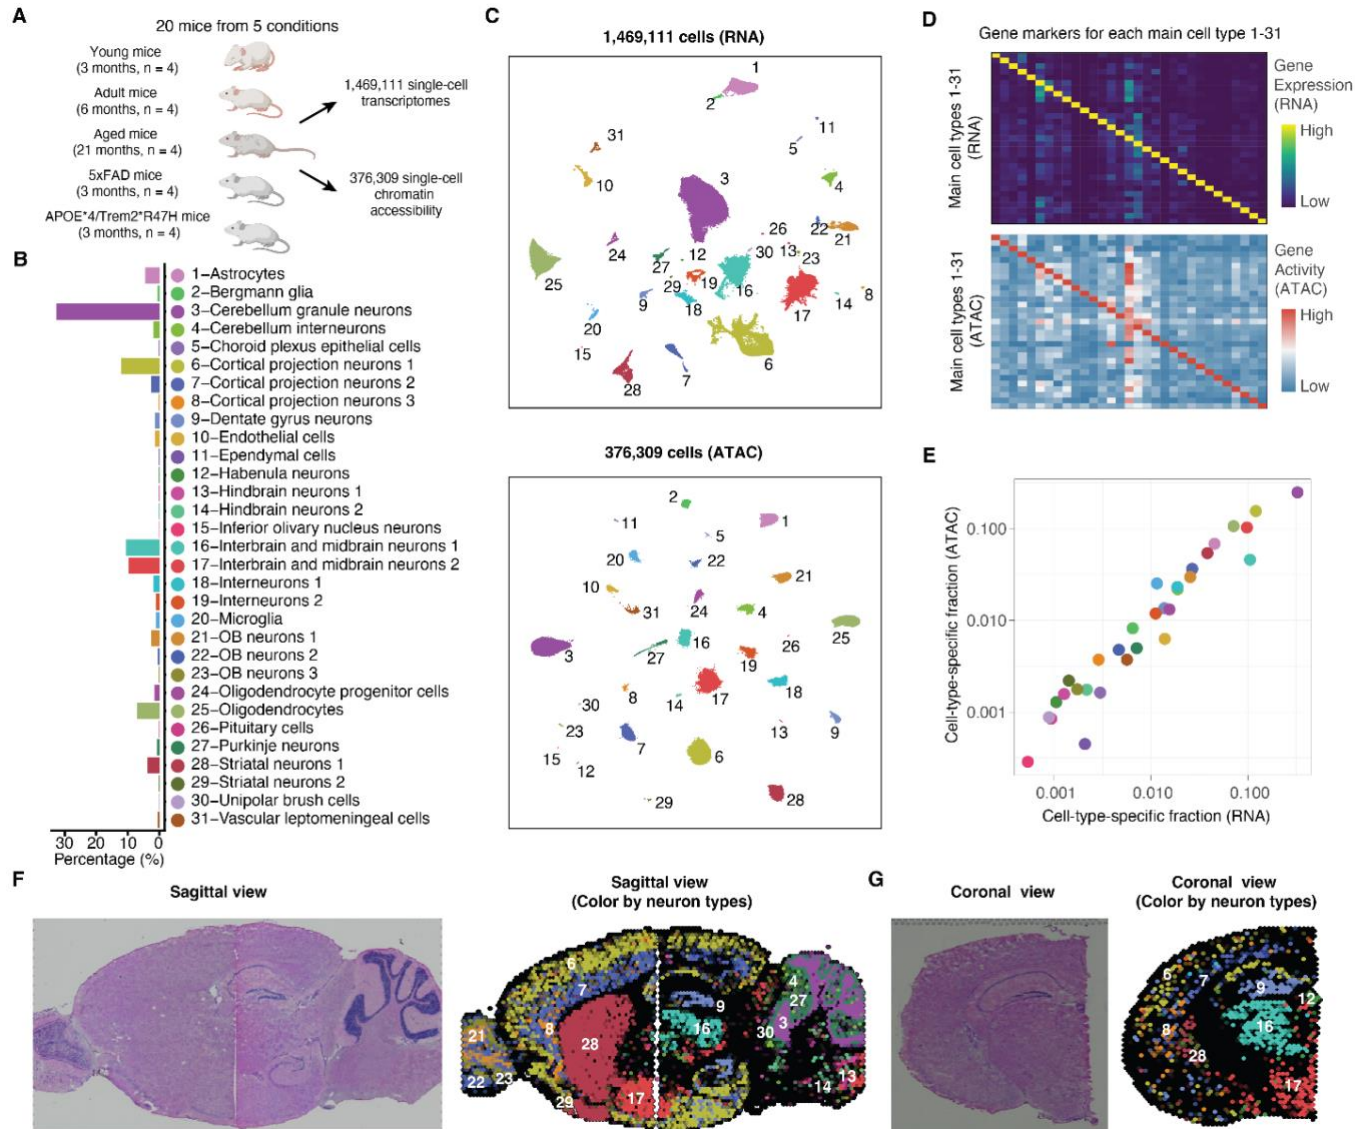

**Figure 2. Single-cell transcriptome and chromatin accessibility profiling of mouse brains with *EasySci*.**

(A) Experiment scheme to reconstruct a brain cell atlas of both gene expression and chromatin accessibility across different ages, sexes, and genotypes.

(B) Bar plot showing the cell-type-specific proportions of the brain cell population profiled by *EasySci-RNA*.

(C) UMAP visualization of mouse brain cells by single-cell transcriptome (top) and chromatin accessibility (bottom), colored by main cell types in (B).

(D) Heatmap showing the aggregated gene expression (top) and gene body accessibility (bottom) of the top ten marker genes (columns) in each main cell type (rows). For both RNA-seq and ATAC-seq, unique reads overlapping with the gene bodies of cell-type-specific markers were aggregated, normalized first by library size, and then scaled by the maximum expression or accessibility across all cell types.

(E) Scatter plot showing the fraction of each cell type in the global brain population by single-cell transcriptome (x-axis) or chromatin accessibility analysis (y-axis).



217 (F-G) Mouse brain sagittal (F) and coronal (G) sections showing the H&E staining (left) and the  
218 localizations of main neuron types through NNLS-based integration (right), colored by main cell types in  
219 (B). The numbers correspond to cell-type-specific cluster-ID in (B).  
220

221 **A computational framework tailored to characterize cellular subtypes in the mammalian brain**

222

223 To investigate the molecular signatures and spatial distributions of cellular subtypes in the brain, we  
224 developed a computational framework tailored to sub-cluster level analysis. Key steps include: (i) sub-  
225 clustering analysis by expression of both genes and exons to increase the clustering resolution (**Figure 3**);  
226 (ii) Integration analysis with spatial datasets to map the distribution of cellular subtypes (**Figure 3**). (iii)  
227 gene module analysis to identify the molecular signatures of main and rare cell types (**Figure 4**);

228

229 Rather than performing sub-clustering analysis with the gene expression alone, we exploited the unique  
230 feature of *EasySci-RNA* (*i.e.*, full gene body coverage), by incorporating both gene counts and exonic  
231 counts for principal component analysis followed by unsupervised clustering (**Methods**). The combined  
232 information greatly increased the resolution of sub-clustering analysis. For example, we recovered several  
233 microglia subtypes that were not easily separated in clusters defined by gene expression alone (*e.g.*, sub-  
234 cluster 13 in microglia marked by an exonic marker *Ttr-ENSMUSE00000477272.5*, **Figure 3A and 3B**).  
235 Leveraging this sub-clustering strategy, we identified a total of 359 sub-clusters, with a median of 1,038  
236 cells in each group (**Figure 3C**). All sub-clusters were contributed by at least two individuals (median of  
237 twenty), with a median of nine exonic markers enriched in each sub-cluster (At least a 2-fold difference  
238 between first and second-ranked cell types with respect to expression; FDR of 5%; and TPM > 50 in the  
239 target sub-cluster, **Figure S9; Table S4**). Some subtype-specific exonic markers were not detected by  
240 conventional differential gene analysis (*e.g.*, *Map2-ENSMUSE00000443205.3* in microglia, **Figure S8**).  
241 Notably, our strategy favors detecting extremely low-abundance cell types. For example, the smallest sub-  
242 cluster (choroid plexus epithelial cells-7) contained only 21 cells (0.001% of the brain population, **Figure**  
243 **3D-E, top**), representing rare pinealocytes in the brain based on gene markers such as *Tph1* and *Ddc*  
244 (Mays et al., 2018). Another example of the rare sub-clusters (vascular leptomeningeal cells-2, 35 cells,  
245 **Figure 3D-E, bottom**) represents the tanycytes, validated by multiple gene markers (*e.g.*, *Fndc3c1*, *Scn7a*  
246 (Campbell et al., 2017)).

247

248 To spatially map the diverse sub-clusters, we integrated the *EasySci-RNA* dataset with the *10x Visium*  
249 spatial transcriptomics datasets (Genomics, 2019a, 2019b, 2019c) using cell2location (Kleshchevnikov et  
250 al., 2022), a Bayesian model designed to map fine-grained cell types. For example, sub-clusters of cortical  
251 projection neuron 1 can be mapped to distinct regions in the cortex by integration analysis (**Figure 3F**). A  
252 similar approach enabled us to deconvolute the region-specificity for other broadly distributed cell types  
253 such as astrocytes (**Figure 3G**). For instance, we identified astrocyte subtypes that specifically mapped to  
254 the olfactory bulb (sub-cluster 7), cortex (sub-cluster 3, 12), hippocampus (sub-cluster 6), thalamus (sub-  
255 cluster 11), midbrain (sub-cluster 4), hindbrain (sub-cluster 10), consistent with the known region-specificity  
256 of astrocytes (Kleshchevnikov et al., 2022).

257

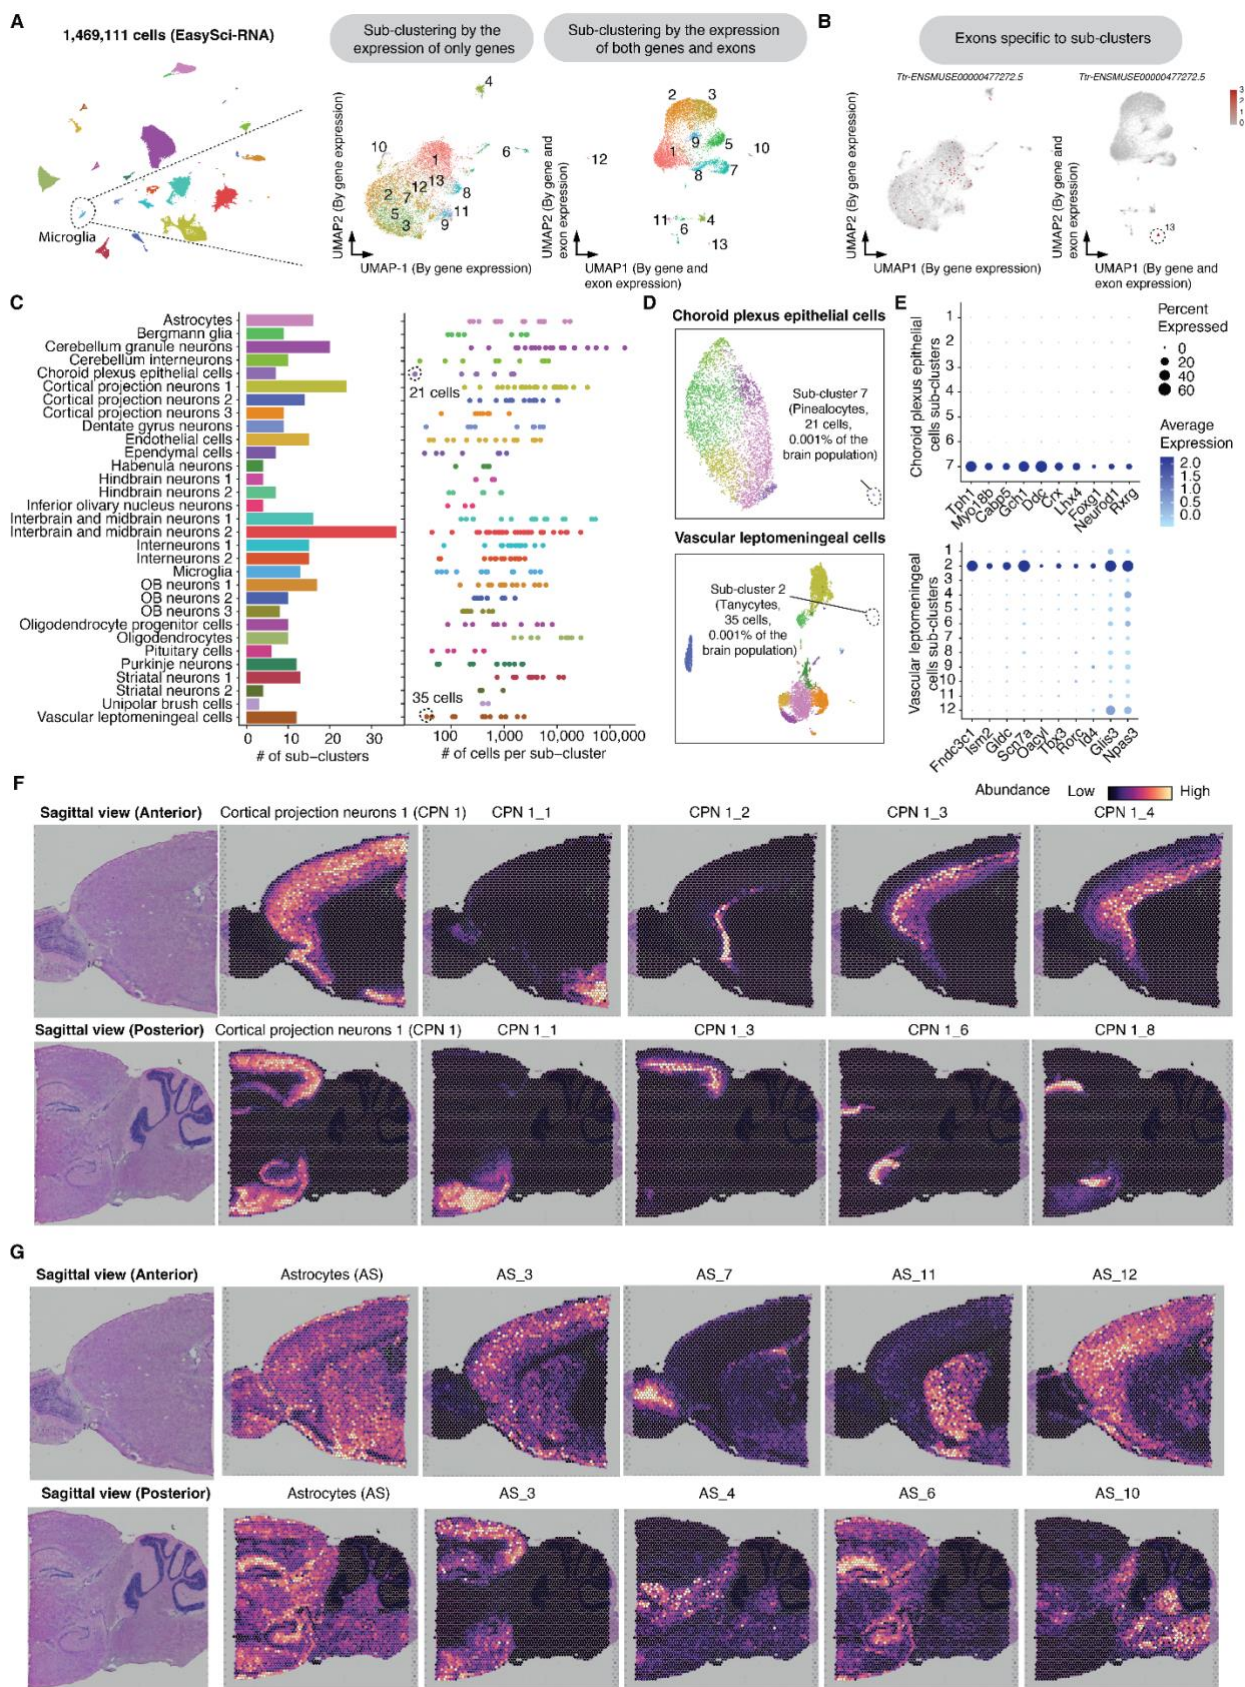

260

261 **Figure 3. Identification and characterization of cellular subtypes in the mouse brain.**

262 (A) Schematic plot showing the computational framework for identifying and characterizing cell sub-  
263 clusters. We subjected each main cell type to sub-clustering analysis based on both gene and exon  
264 expression. As an example, we performed UMAP analysis of microglia cells based on gene expression  
265 alone (left), or both gene and exon level expression (right). Cells are colored by sub-cluster ID from Louvain  
266 clustering analysis with combined gene and exon level information. Several sub-clusters cannot be  
267 separated from each other in the UMAP space by gene expression alone.

268 (B) UMAP plots same as (A), showing the expression of an exonic marker *Ttr-ENSMUSE00000477272.5*  
269 of microglia sub-cluster 13. Microglia-13 can be better separated when combining both gene and exon  
270 level information.

271 (C) By sub-clustering analysis, we identified a total of 359 sub-clusters across 31 main cell types. The  
272 barplot (left) shows the number of sub-clusters for each main cell type. The dot plot (right) shows the  
273 number of cells from each sub-cluster. Two rare sub-clusters (choroid plexus epithelial cells-7 and vascular  
274 leptomeningeal cells-2) are circled out.

275 (D) UMAP visualizations showing sub-clustering analysis for choroid plexus epithelial cells (top) and  
276 vascular leptomeningeal cells (bottom) colored by sub-cluster IDs, highlighting two rare sub-clusters shown  
277 in (C).

278 (E) Dot plot showing the expression of selected marker genes for choroid plexus epithelial cells-7 (top) and  
279 vascular leptomeningeal cells-2 (bottom), including both normal genes (left five genes) and transcription  
280 factors (right five genes).

281 (F-G) Mouse brain sagittal sections showing spatial abundances of main cell types and related sub-clusters  
282 for cortical projection neurons 1 (F) and astrocytes (G) in anterior (top) and posterior (bottom) regions,  
283 estimated using the cell2location (Kleshchevnikov et al., 2022).

284



## 285 **Gene module analysis to determine cell-type-specific molecular programs**

286

287 We next examined the key molecular programs underlying diverse cellular subtypes by gene module  
288 analysis. We clustered genes based on their expression variance across all 359 cell sub-clusters, revealing  
289 a total of 21 gene modules (GM) (**Figure 4A; Figure S10; Table S5**). The largest gene module (GM1)  
290 corresponds to a group of housekeeping genes (*e.g.*, ribosomal synthesis) universally expressed across  
291 all sub-clusters. Several gene modules were enriched in specific cell types, such as the ependymal cell-  
292 specific gene module (GM11, enriched biological process: cilium movement, adjusted p-value =  $1.2e-26$ )  
293 (Kuleshov et al., 2016) (**Figure 4B**). Meanwhile, we detected gene modules that marked rare subtypes.  
294 For example, GM9, including genes in neuropeptide signaling (*e.g.*, *Tbx19*, *Pomc* (Liu et al., 2001)), was  
295 highly enriched in a subtype of pituitary cells (PC-6) corresponding to corticotropic cells (**Figure 4B**). A  
296 similar analysis enabled us to characterize other rare cell subtypes, including myeloid cells (microglia-13,  
297 0.005% of the cell population, marked by GM19), pars tuberalis cells (vascular leptomeningeal cells-12  
298 (VLC-12), 0.003% of the cell population, marked by GM20), as well as aforementioned pinealocytes  
299 (choroid plexus epithelial cells-7 (CPEC-7), 0.001% of the cell population, marked by GM2) (**Figure S10**).

300

301 Remarkably, rare proliferating cell types were identified through a cell-cycle-related gene module (GM6,  
302 enriched biological process: microtubule cytoskeleton organization involved in mitosis, adjusted p-value =  
303  $1.2e-44$ ) (Kuleshov et al., 2016), including proliferating cells of neurons (OB neurons 1-17, 0.03% of the  
304 cell population), astrocytes (astrocytes-7, 0.15% of the cell population), oligodendrocytes progenitor cells  
305 (oligodendrocytes progenitor cells-4, 0.04% of the cell population) and microglia (microglia-10, 82 cells,  
306 0.006% of the cell population) (**Figure 4B**). These sub-clusters were marked by conventional proliferating  
307 markers such as *Mki67*, as well as a group of lncRNAs (*e.g.*, *Gm29260*, *Gm37065*), most of which were  
308 not well-characterized in previous studies (**Figure 4C**).

309

310 To spatially map the rare cell types, we next investigated the expression patterns of cell-type-specific gene  
311 modules across spatial spots of the *10x Visium* spatial transcriptomic datasets (Genomics, 2019a, 2019b,  
312 2019c), which resolved the anatomical locations of multiple main and rare cell types. For example,  
313 ependymal cells, a critical cell type regulating cerebrospinal fluid (CSF) homeostasis, were mapped along  
314 brain ventricles as expected (**Figure 4D**). Furthermore, rare proliferating cells were mapped to the  
315 subventricular zone area (**Figure 4E**). A similar analysis enables us to spatially map other rare cell types  
316 with high resolution, including pinealocytes (CPEC-7, GM2), corticotropic cells (PC-6, GM9), pars tuberalis  
317 cells (VLC-12, GM20), tanycytes (VLC-2, GM14) and a less-characterized endothelial cell type in the  
318 pituitary gland (*Igfbp3*<sup>+</sup> *Sfn*<sup>+</sup> endothelial cells, EC-10, GM7) (**Figure 4F**).

319



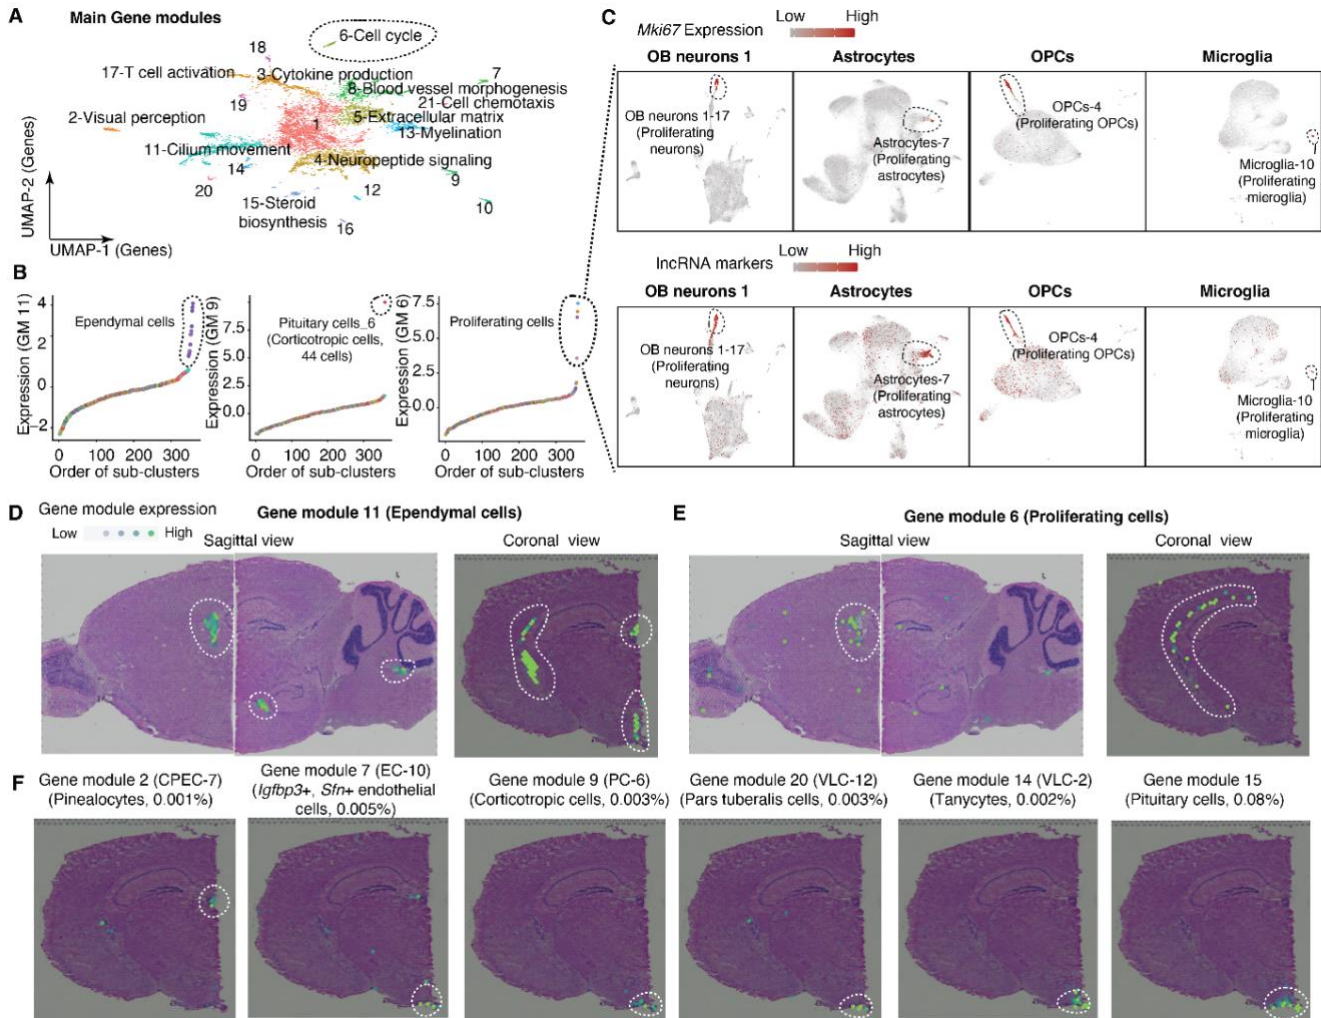

320

321

322

323

324

325

326

327

328

329

330

331

332

333

334

335

336

337

**Figure 4. Identification of key molecular programs underlying cell type specificity in the mouse brain.**

(A) UMAP visualizations of genes colored by identified gene module IDs.

(B) Scatter plots showing examples of gene modules and their expression levels across sub-clusters (ordered by the level of gene module expression): GM-11 is specific to ependymal cells; GM-9 is specific to pituitary cell-6 (corticotropic cells); GM-6 marks four proliferating sub-clusters from different main cell types.

(C) UMAP visualization showing four proliferating sub-clusters identified from OB neurons 1, astrocytes, oligodendrocyte progenitor cells, and microglia, colored by the normalized expression of canonical proliferating marker *Mki67* (top) and the aggregated expression of IncRNAs in GM-6 (bottom). UMI counts are first normalized by library size, log-transformed, aggregated (for multiple genes), and then mapped to Z-scores. OPCs, oligodendrocyte progenitor cells.

(D-E) Plots showing the normalized expression of gene modules in spatial transcriptomic datasets profiling mouse sagittal (left) and coronal (right) sections: GM-11 is specific to ependymal cells (D); GM-6 is specific to proliferating cells (E).

(F) Similar to (D), plots showing the normalized expression of gene modules in spatial transcriptomic dataset profiling a mouse coronal section. UMI counts for genes from each gene module are scaled for

338 library size, log-transformed, aggregated, and then mapped to Z-scores. CPEC, choroid plexus epithelial  
339 cells; EC, endothelial cells; PC, pituitary cells; VLC, vascular leptomeningeal cells.  
340

## 341 **A global view of brain cell population dynamics across the adult lifespan at subtype resolution**

342

343 To obtain a global view of brain cell population dynamics across the adult lifespan, we first quantified the  
344 cell-type-specific fractions recovered from cell populations in each individual mouse. We next performed  
345 differential abundance analysis across all 359 sub-clusters (**Methods**), yielding 45 significantly changed  
346 sub-clusters during the early growth stage (between 3 and 6 months) and 29 significantly changed sub-  
347 clusters upon aging (between 6 and 21 months; FDR of 0.05, at least two-fold change of cellular fractions,  
348 **Figure 5A; Table S6 and S7**). Most significantly changed cell types were consistent between male and  
349 female mice (**Figure 5B**).

350  
351 Both the main clusters and subtypes of olfactory bulb (OB) neurons showed a remarkable population  
352 expansion from young to adult mice (**Figure 5A, left**), consistent with the expansion of the OB region  
353 during the early growth stage (Tufo et al., 2022). Meanwhile, a rare astrocytes subtype (AS-14, *Lyn+*  
354 *Adgrb1+*; 0.05% of the global population) and a vascular leptomeningeal cell subtype (VLC-14, *Sox10+*  
355 *Mybpc1+*; 0.06% of the global population) also showed substantial expansion (over 4-fold) in the same  
356 period. We further characterized the chromatin accessibility of these two rare cell types, along with many  
357 OB neuron subtypes, by single-cell RNA-seq and ATAC-seq integration analysis through the deep-  
358 learning-based strategy (Lin et al., 2022) described above (**Figure S11A-C; Methods**). As expected, the  
359 observed cell population dynamics can be cross-validated by two molecular layers (*i.e.*, RNA and ATAC)  
360 (**Figure S11D**). Furthermore, both cell subtypes were spatially mapped to the OB region based on the  
361 expression of cell-type-specific gene markers in *10x Visium* spatial transcriptomic data (Genomics, 2019a,  
362 2019b, 2019c) (**Figure 5C, left**), suggesting their potential roles in OB expansion during the early growth  
363 stage. As a further illustration of this point, the astrocytes subtype 14 is featured with the high expression  
364 of *BA11*, a gene marker involved in the clean-up of apoptotic neuronal debris produced during fast growth  
365 of the brain (Sokolowski et al., 2011). The vascular leptomeningeal cell subtype 4 highly expresses gene  
366 markers of olfactory ensheathing cells (*e.g.*, *Sox10* and *Mybpc1* (Rosenberg et al., 2018; Tepe et al.,  
367 2018)), a key cell type that supports the growth and regeneration of axons in the central nervous system  
368 (Barraud et al., 2010).

369  
370 The aging-associated cell population changes between 6 and 21 months differed remarkably from the early  
371 growth stage. For example, all main cell types of OB neurons remain relatively stable during aging. Instead,  
372 we found aging-associated changes mostly in specific neuron subtypes. Key examples include the  
373 expansion of an OB neurons 3 subtype (OBN 3-3, marked by *Cpa6* and *Col23a1*) corresponding to a group  
374 of less-characterized excitatory neurons in the mitral cell layer of the OB region (Monavarfeshani et al.,  
375 2017), and the depletion of another OB neurons 1 subtype (OBN 1-11, marked by *Robo2* and *Prokr2*)  
376 corresponding to the OB neuroblasts (Puverel et al., 2009; Zeisel et al., 2018)). These subtypes were  
377 spatially mapped to different areas of the olfactory bulb (**Figure 5C, right**), which is in contrast with the  
378 early growth stage, where almost all subtypes of OB neurons expanded across all regions.

379  
380 We identified a total of 21 subtypes showing a marked reduction across the adult lifespan of the mouse  
381 brain. For example, the most depleted populations in the aged brain include OB neuroblasts (OBN 1-11,  
382 marked by *Prokr2* and *Robo2* (Puverel et al., 2009; Zeisel et al., 2018)), OB neuronal progenitor cells (OBN  
383 1-17, marked by *Mki67* and *Egfr* (Pastrana et al., 2009)), and dentate gyrus (DG) neuroblasts (DGN-8,  
384 marked by *Sema3c* and *Igf1pl1* (Kumar et al., 2020)) (**Figure 5D, left**). Interestingly, the population of DG  
385 neuroblasts showed a substantial decrease even in the early growth stage, suggesting an earlier decline

386 of DG neurogenesis compared to OB neurogenesis. In contrast to the depleted pool of neurogenesis  
387 progenitors, the proliferating oligodendrocyte progenitor cells (cycling OPCs, OPC-4, marked by *Pdgfra*  
388 and *Mki67*) remain relatively stable during aging. Instead, we detected the aging-associated depletion of  
389 the newly formed oligodendrocytes (oligodendrocytes-6 (OLG-6), marked by *Prom1* and *Tcf7l1* (Marques  
390 et al., 2018; Pastrana et al., 2009)) and committed oligodendrocyte precursors (OPC-6, marked by *Bmp4*  
391 and *Enpp6* ((Marques et al., 2018; Pastrana et al., 2009; Zhang et al., 2014)), indicating that the  
392 oligodendrocyte differentiation is impaired upon aging.

393

394 While the aforementioned integrative approach successfully identified the chromatin landscape of all main  
395 cell types, there were several substantial challenges for the sub-clustering level analysis, including the  
396 relatively lower number of profiled cells and lower resolution of the single-cell chromatin accessibility  
397 dataset compared with the single-cell transcriptome analysis. Nevertheless, we were able to recover  
398 several cell subtypes with relatively high abundance and unique epigenetic signatures. For example, we  
399 identified OB neuroblasts (OBN 1-11), OB neuronal progenitors (OBN 1-17), and newly formed  
400 oligodendrocytes (OLG-6) (**Figure S12A and S12B**), all of which exhibited a sharply decreased cell  
401 proportions in the aged brain similar to the single-cell transcriptome analysis (**Figure 5D, right**). Moreover,  
402 cell-type-specific TF regulators were identified and validated by both gene expression and TF motif  
403 accessibility, such as known regulators of neurogenesis (e.g., *Sox2* and *E2f2* (Graham et al., 2003; Li et  
404 al., 2018)) (**Figure 5E**), which further validated this integration approach for characterizing key epigenetic  
405 signatures of cellular subtypes associated with aging.

406

407 We identified a total of 14 cellular sub-clusters that exhibited a remarkable expansion in the aged brain,  
408 such as a microglia sub-cluster (MG-9, *ApoE+*, *Csf1+*) corresponding to a previously reported disease-  
409 associated microglia subtype (Keren-Shaul et al., 2017). In addition, we identified a reactive  
410 oligodendrocyte subtype (OLG-7, *C4b+*, *Serpina3n+* (Kenigsbuch et al., 2022; Zhou et al., 2020))  
411 significantly enriched in the aged brain. With the chromatin accessibility dataset, we further confirmed the  
412 expansion of this cell type (**Figure 5F; Figure S12B and S12C**), and identified its associated transcription  
413 factors (**Figure 5E**), such as *Stat3*, a critical factor involved in the regulation of inflammation and immunity  
414 in the brain (See et al., 2012). To further characterize the spatial distribution of the reactive  
415 oligodendrocytes in the brain, we performed spatial transcriptomics analysis of both adult and aged mouse  
416 brains. A striking enrichment of the reactive oligodendrocyte-specific markers (e.g., *C4b*, *Serpina3n*) was  
417 detected around the subventricular zone (SVZ), a region critical for the continual production of new neurons  
418 in adulthood (**Figure 5G and 5H**), indicating an age-related activation of inflammation signaling around the  
419 adult neurogenesis niche.

420

421 We next explored the subtype-specific manifestation of key aging-related molecular signatures. Through  
422 differentially expressed gene analysis, we identified 7,135 aging-associated signatures across 359 sub-  
423 clusters (FDR of 5%, with at least a 2-fold change between aged and adult brains, **Table S8; Figure S13A**).  
424 Out of the 580 genes significantly altered in multiple ( $\geq 3$ ) subtypes, we detected 241 genes that were  
425 differentially expressed in concordant directions across subtypes (**Figure S13B**). For example, *Nr4a3*, a  
426 component of DNA repair machinery and a potential anti-aging target (Paillasse and de Medina, 2015),  
427 was significantly decreased in aged neurons, including striatal neurons, OB neurons, and interneurons.  
428 *Hdac4*, encoding a histone deacetylase and a recognized regulator of cellular senescence (Di Giorgio et  
429 al., 2021), was significantly reduced in aged astrocytes and ependymal cells. Meanwhile, the Insulin-  
430 degrading enzyme (IDE), a key factor involved in amyloid-beta clearance (Zhang and Wang, 2018),

431 showed increased expression mostly in subtypes of neurons, including interneurons, OB neurons,  
432 interbrain, and midbrain neurons. While many of these genes have been previously reported to be  
433 associated with aging, our analysis represents the first global view of their alterations across over 300  
434 subtypes. In addition, we identified several non-coding RNAs that underwent age-associated changes in  
435 multiple cell subtypes, most of which showed high cell-type-specificity (e.g., *B230209E15Rik* in cortical  
436 projection neurons subtypes) but were not well-characterized previously (**Figure S13B**).  
437



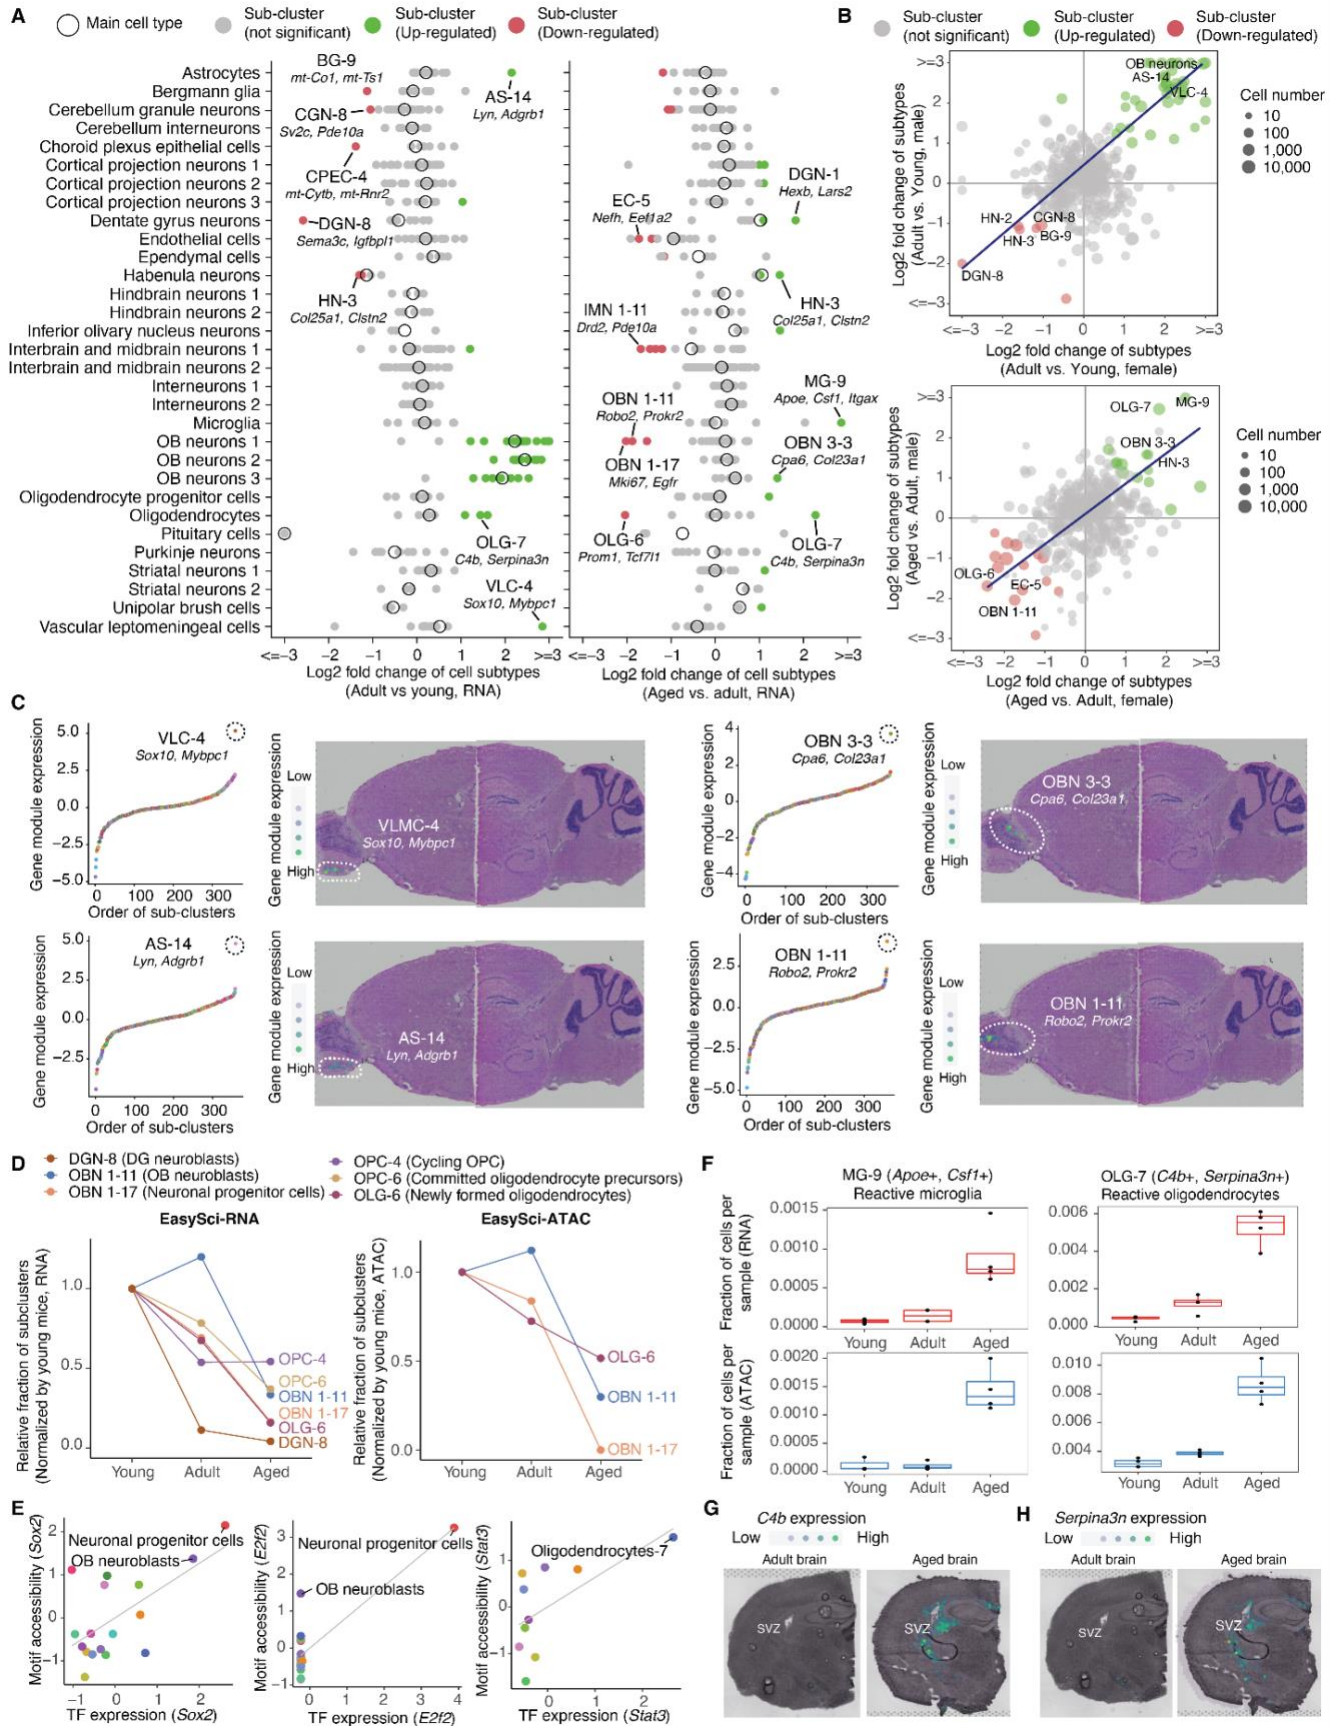

439 **Figure 5. Identifying brain cell population changes across the adult lifespan at subtype resolution.**  
440 (A) Dot plots showing the cell-type-specific fraction changes (*i.e.*, log-transformed fold change) of main cell  
441 types (circles) and sub-clusters (dots) in the early growth stage (adult vs. young, left plot) and the aging  
442 process (aged vs. adult, right plot) from *EasySci*-RNA data. Differential abundant sub-clusters were colored  
443 by the direction of changes. Representative sub-clusters were labeled along with top gene markers. AS,  
444 astrocytes; BG, Bergmann glia; CGN, cerebellum granule neurons; CPEC, choroid plexus epithelial cells;  
445 DGN, dentate gyrus neurons; EC, endothelial cells; HN; habenula neurons; IMN 1, interbrain and midbrain  
446 neurons 1; MG, microglia; OBN 1, OB neurons 1; OBN 3; OB neurons 3; OLG, oligodendrocytes; VLC;  
447 vascular leptomenigeal cells.  
448 (B) Scatter plots showing the correlation of the sub-cluster specific fraction changes between males and  
449 females in the early growth stage (top) and the aging stage (bottom), with a linear regression line. The  
450 most significantly changed sub-clusters are annotated on the plots.  
451 (C) Examples of development- or aging-associated subclusters are highlighted in (a) and their spatial  
452 positions. Left: scatter plots showing the aggregated expression of sub-cluster-specific marker genes  
453 across all sub-clusters. Right: plots showing the aggregated expression of sub-cluster-specific marker  
454 genes across a brain sagittal section in 10x Visium spatial transcriptomics data (Genomics, 2019a, 2019b,  
455 2019c). UMI counts for gene markers are scaled for library size, log-transformed, aggregated, and then  
456 mapped to Z-scores.  
457 (D) Line plots showing the relative fractions of depleted subclusters across three age groups identified  
458 from *EasySci*-RNA (left) and *EasySci*-ATAC (right).  
459 (E) Scatter plots showing the correlated gene expression and motif accessibility of transcription factors  
460 enriched in OB neurons 1-17 (*Sox2* and *E2f2*, left and middle) and oligodendrocytes-7 (*Stat3*, right),  
461 together with a linear regression line.  
462 (F) Box plots showing the fractions of the reactive microglia (left) and reactive oligodendrocytes (right)  
463 across three age groups profiled by *EasySci*-RNA (top) and *EasySci*-ATAC (bottom). For all box plots:  
464 middle lines, medians; upper and lower box edges, first and third quartiles, respectively; whiskers, 1.5  
465 times the interquartile range; and all individual data points are shown.  
466 (G-H) Mouse brain coronal sections showing the expression level of *C4b* (g) and *Serpina3n* (h) in the adult  
467 (left) and aged (right) brains from spatial transcriptomics analysis.  
468

## 469 **A global view of AD pathogenesis-associated signatures and subtypes**

470

471 Toward a global view of AD-associated cell population dynamics, we quantified the relative fraction of sub-  
472 clusters in the two AD models for comparison with their age-matched wild-type controls (3-month-old). We  
473 detected 16 and 14 significantly changed sub-clusters (FDR of 5%, at least two-fold change) in the EOAD  
474 (5xFAD) model and LOAD (APOE\*4/Trem2\*R47H) model, respectively (**Figure 6A, Table S9 and S10**).  
475 Most significantly altered subtypes showed consistent proportion changes in male and female mice (**Figure**  
476 **6B**).

477

478 Interestingly, while these two AD mutants involved different genetic perturbations, the significantly altered  
479 cell subtypes were highly concordant (**Figure 6C**). For example, a rare choroid plexus epithelial cell  
480 subtype (CPEC-4, 0.02% of the total brain cell population) was strongly depleted (> two-fold decrease) in  
481 both AD models. This cell type is marked by significant enrichment of multiple mitochondrial genes,  
482 including *mt-Rnr1*, *mt-Rnr2*, *mt-Co1*, *mt-Cytb*, *mt-Nd1*, *mt-Nd2*, *mt-Nd5*, and *mt-Nd6*. Out of these gene  
483 markers, *mt-Rnr2* is involved in synthesizing neuroprotective factors against neurodegeneration by  
484 suppressing apoptotic cell death (Hashimoto et al., 2001). Other markers (e.g., *mt-Rnr1* and *mt-Nd5*) are  
485 associated with the phosphorylated Tau protein levels in cerebrospinal fluid (Cavalcante et al., 2022).  
486 While this subtype was rarely detected in our single-cell ATAC data, we were able to map the cell subtype  
487 to the area around the subventricular zone by the expression of its cell-type-specific markers in the spatial  
488 transcriptomics data (**Figure 6D and 6E, top**). Furthermore, the spatial transcriptomics analysis further  
489 validated the depletion of this cell type in the EOAD (5xFAD) model (**Figure 6E**), suggesting a potential  
490 interplay between cell-type-specific mitochondrial functions and neurodegenerative phenotypes.

491

492 By contrast, another choroid plexus epithelial cell subtype (CPEC-6, 0.045% of the total brain cell  
493 population; marked by *Sptlc3+*, *Fer1l6+*) expanded in both AD models (over two-fold increase) (**Figure**  
494 **6B**). It is marked by the gene *Sptlc3*, which encodes a subunit of a complex that catalyzes the synthesis  
495 of sphingolipids, a group of bioactive molecules contributing to amyloid-beta production and Alzheimer  
496 pathogenesis (Mielke and Lyketsos, 2010). Furthermore, we identified another rare interbrain and midbrain  
497 neuron subtype (IMN 1-13, 0.61% of the total brain population; marked by *Col25a1+*, *Ndrg1+*) that  
498 expanded considerably in both AD models (**Figure 6C**). This subtype is characterized by the expression  
499 of *Col25a1*, a membrane-associated collagen that has been reported to promote intracellular amyloid  
500 plaque formation in mouse models (Tong et al., 2010). Indeed, we identified an up-regulation of IMN 1-13  
501 specific gene markers in the thalamus region of the 5xFAD mouse brain (**Figure 6D and 6E, bottom**),  
502 further validating the single-cell transcriptome analysis.

503

504 Finally, we detected a significant expansion of the microglia subtype 9 (MG-9, 0.026% of the total brain  
505 cell population, marked by *ApoE+*, *Csf1+*) in the early-onset 5xFAD mice, consistent with previous reports  
506 (Keren-Shaul et al., 2017). The reactive microglia subtype was also expanded in the aged group, but not  
507 in the late-onset APOE\*4/Trem2\*R47H model (3-month-old) (**Figure 6F, left**), potentially due to the  
508 different disease onset. Consistent proportion changes were detected with the chromatin accessibility  
509 dataset (**Figure 6F, right**). We next integrated both transcriptome and chromatin accessibility profiles to  
510 further delineate the molecular programs of this reactive microglia subtype. We first identified 199 genes  
511 differentially expressed in the reactive microglia subtype, many of which (44%) can be validated by the  
512 promoter accessibility (**Figure S12D**). We then revealed key transcription factors validated by both cell-  
513 type-specific gene expression and motif accessibility (**Figure 6G**), including TFs of the NF-kappa B



514 signaling pathway (e.g., *Nfkb1* and *Relb* (Oeckinghaus and Ghosh, 2009)) and TFs involved in oxidative  
515 stress protection (e.g., *Nfe2l2* (Liu et al., 2017)), and cholesterol homeostasis (e.g., *Sreb2* (Bommer and  
516 MacDougald, 2011)). These molecular pathways could play critical regulatory roles in microglia  
517 specification and expansion in aging and AD.

518

519 We next explored AD pathogenesis-associated signatures in AD mouse models. Through differentially  
520 expressed gene analysis (**Methods**), 6,792 and 7,192 sub-cluster-specific DE genes were detected in the  
521 5xFAD (EOAD) model and the APOE\*4/Trem2\*R47H (LOAD) model, respectively (**Figure S13C and**  
522 **S13E, Table S11 and S12**). For example, we observed a global down-regulation of the mouse *Apoe* gene  
523 across many sub-clusters in the APOE\*4/Trem2\*R47H mice (**Figure S13D**), potentially due to the fact that  
524 part of the *Apoe* gene is replaced with the human sequence that does not align to the mouse genome.  
525 Meanwhile, we detected a global change of *Thy1* across many neuron types in the 5xFAD mice, consistent  
526 with the fact that all transgenes introduced in the 5xFAD model were overexpressed under the *Thy1*  
527 promoter (**Figure S13F**). Remarkably, many AD-associated gene signatures exhibited concordant  
528 changes across cellular subtypes (**Figure S13D and S13F**). For example, markers involved in unfolded  
529 protein stress (e.g., *Hsp90aa1*) and oxidative stress (e.g., *Txnrd1*) were significantly upregulated in an  
530 overlapped set of neuron subtypes in the early-onset 5xFAD mice (**Figure S13D**), indicating increased  
531 stress levels and cellular damages in neurons across the brain. Meanwhile, *Reln*, which encodes a large  
532 secreted extracellular matrix protease involved in the ApoE biochemical pathway (Seripa et al., 2008),  
533 significantly decreased in multiple cell types (e.g., OB neurons, interbrain and midbrain neurons, vascular  
534 cells, oligodendrocytes) in both early- and late-onset models (**Figure S13D and S13F**). This is consistent  
535 with previous reports that the depletion of *Reln* is detectable even before the onset of amyloid-beta  
536 pathology in the human frontal cortex (Herring et al., 2012). Other interesting phenomena included the  
537 overall upregulation of *Ide*, a gene responsible for amyloid-beta degradation, in the late-onset model similar  
538 to the aged brain (**Figure S13B and S13F**). Less-characterized genes were identified as well. For  
539 example, *Tlcd4*, a gene involved in lipid trafficking and metabolism (Attwood and Schiöth, 2021), was  
540 significantly downregulated in thirty-five sub-clusters across broad cell types (e.g., OB neurons, vascular  
541 cells, oligodendrocytes) in the EOAD mice (**Figure S13D**), indicating a potential interplay between the lipid  
542 homeostasis and cellular changes in the early stage of AD.

543

544 While the two AD mouse models are different in terms of genetic perturbations or disease onsets, their  
545 cell-type-specific molecular changes were surprisingly consistent. Illustrative of this, we detected 559 sub-  
546 cluster-specific DE genes shared between two AD mutants, such as genes involved in epilepsy (Adjusted  
547 p-value = 0.02, e.g., *Gria1*, *Med1*, *Plp1*) (Kuleshov et al., 2016) and oxidative stress protection pathway  
548 (Adjusted p-value = 0.05, e.g., *Arnt*, *Nfe2l2*) (Kuleshov et al., 2016). Intriguingly, 99% (555 of the 559) of  
549 the shared DE genes showed concordant changes in two AD mutants (Pearson correlation coefficient  $r =$   
550 0.96, p-value < 2.2e-16, **Figure S13G**), indicating shared molecular programs between early- and late-  
551 onset AD models. Of note, this analysis further validates that the APOE\*4/Trem2\*R47H mice mutant, a  
552 mouse model recently developed, can serve as an informative model to study Alzheimer's disease.

553

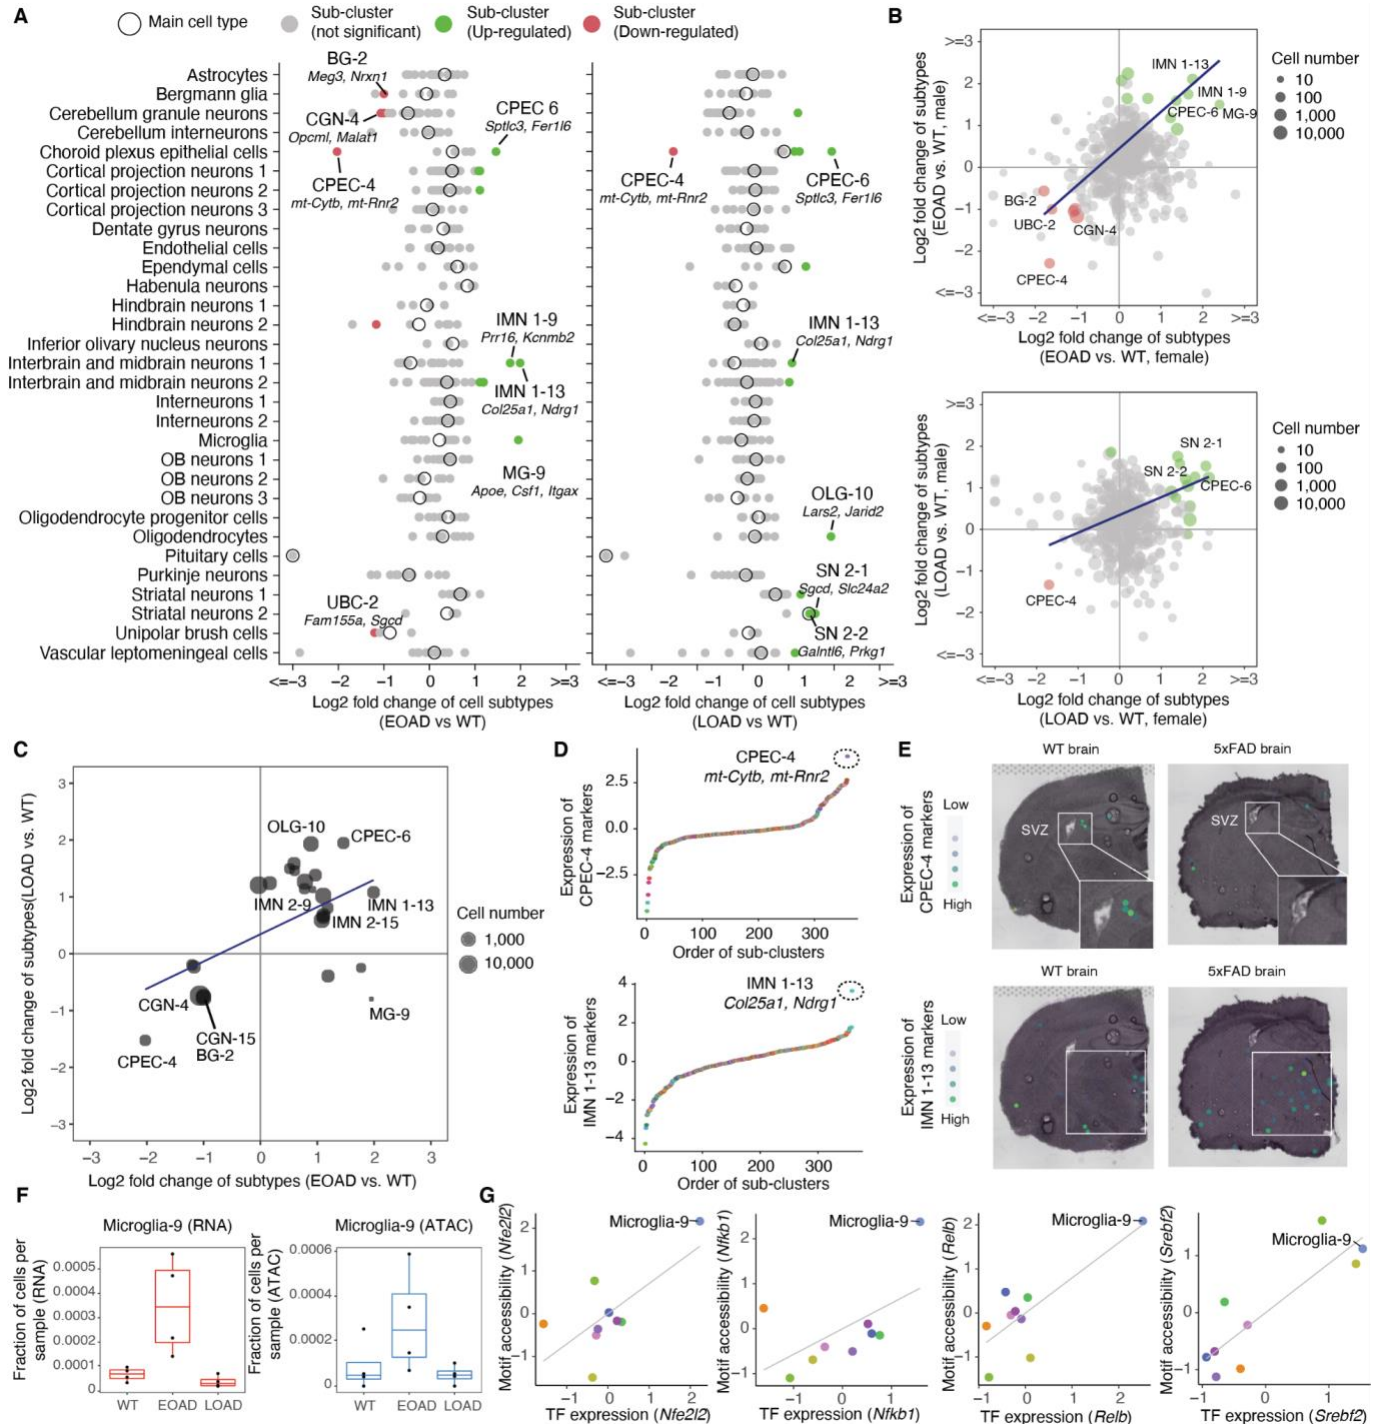

554 **Figure 6. Identifying AD pathogenesis-associated cell subtypes.**

555 (A) Dot plots showing the log-transformed fold changes of main cell types (circles) and sub-clusters (dots)  
 556 comparing EOAD vs. WT (left) and LOAD vs. WT (right). Differential abundant sub-clusters were colored  
 557 by the direction of changes. Representative sub-clusters were labeled along with top gene markers. BG,  
 558 Bergmann glia; CPEC, choroid plexus epithelial cells; IMN 1, interbrain and midbrain neurons 1; MG,  
 559 microglia; OLG, oligodendrocytes; SN 2, striatal neurons 2.



560 (B) Scatter plots showing the correlation of the log-transformed fold changes of sub-clusters (top: EOAD  
561 vs. WT, bottom: LOAD vs. WT) between male and female.

562 (C) Scatter plot showing the correlation of the log-transformed fold changes of sub-clusters in two AD  
563 models (both compared with the wild-type). Only sub-clusters showing significant changes in at least one  
564 AD model are included.

565 (D) Scatter plots showing the aggregated expression of gene markers of two cell subtypes (top: choroid  
566 plexus epithelial cells-4; bottom: the interbrain and midbrain neurons 1-13) across all sub-clusters from  
567 *EasySci-RNA* data.

568 (E) Brain coronal sections showing the spatial expression of subtype-specific gene markers of two  
569 subtypes (top: choroid plexus epithelial cells-4; bottom: the interbrain and midbrain neurons 1-13) in the  
570 WT and EOAD (5xFAD) brains in 10x Visium spatial transcriptomics data.

571 (F) Box plots showing the fraction of microglia-9 cells across different conditions profiled by *EasySci-RNA*  
572 (left) or *EasySci-ATAC* (right). For all box plots in this figure: middle lines, medians; upper and lower box  
573 edges, first and third quartiles, respectively; whiskers, 1.5 times the interquartile range; and all individual  
574 data points are shown.

575 (G) Scatter plot showing the correlated gene expression and motif accessibility of four transcription factors  
576 (*Nfe2l2*, *Nfkb1*, *Relb*, and *Srebf2*) enriched in microglia-9, together with a linear regression line.  
577

## 578 Identification of dysregulated gene signatures in human AD brains

579

580 To examine the AD pathogenesis-associated gene signatures, we further sequenced a total of 118,240  
581 single-nuclei transcriptomes (a median of 5,585 nuclei per sample, with a median of 1,109 UMIs per  
582 nucleus, **Figure S14A and S14B**) from twenty-four human brain samples across two brain regions  
583 (hippocampus, superior and middle temporal lobe (SMTG)), derived from six Alzheimer's disease patients  
584 and six age- and gender-matched controls (**Table S13**). Thirteen main cell types were identified through  
585 integration analysis with the mouse dataset and validated by the cluster-specific expression of known  
586 markers (**Figure 7A and Figure S14C-E**).

587

588 We next sought to investigate the region- and cell type-specific gene expression changes associated with  
589 human AD pathogenesis. By differential gene expression analysis, we identified a total of 4,171 and 2,149  
590 cell-type-specific DE genes in the hippocampus and SMTG, respectively (**Figure 7B, Table S14**). 349  
591 genes were significantly changed in the same cell type from two distinct regions, among which 332 were  
592 altered in concordant directions (**Figure 7C**, Pearson correlation coefficient  $r = 0.68$ ,  $p\text{-value} < 2.2e-16$ ).  
593 For example, oligodendrocytes from both regions exhibited down-regulated expression of an  
594 oligodendrocyte terminal differentiation factor *OPALIN* (de Faria et al., 2019) and an oxidation stress  
595 protector *OXR1* (Volkert and Crowley, 2020). Meanwhile, we detected an increased expression of genes  
596 related to programmed cell death (e.g., *FLCN* and *RASSF2*) (Cooper et al., 2009; Schmidt and Linehan,  
597 2018), indicating an elevated stress level in oligodendrocytes from both regions. Other examples include  
598 the microglia-specific upregulation of *PTPRG*, a receptor protein tyrosine phosphatase that plays a key  
599 role in mediating AD-associated neuronal death (Luo et al., 2022). In astrocytes, we observed a decreased  
600 expression of several transmembrane transporters (e.g., *AQP4* and *SLCO1C1*) as well as neural  
601 transmitter metabolism enzymes (e.g., *GLUD1*), suggesting an impairment of blood-brain barrier (Silva et  
602 al., 2021) and altered metabolic state (Kulijewicz-Nawrot et al., 2013) in astrocytes from both regions of  
603 the AD brains.

604

605 Remarkably, some of the AD-associated gene signatures present with region-specific expression patterns.  
606 For example, *GPNMB*, a transmembrane glycoprotein associated with microglia activation in AD brains  
607 (Hüttenrauch et al., 2018), showed increased expression in the microglia from the hippocampus but not  
608 from SMTG (**Figure 7D, top**). On the other hand, *MMP24*, a gene of the matrix metalloproteinase family  
609 and extensively implicated in AD pathogenesis in previous studies (Zipfel et al., 2020), exhibited an  
610 increase in cortical projection neurons unique to SMTG (**Figure 7D, bottom**). In fact, inhibiting MMP24  
611 has been shown to reduce the amyloid-beta levels and promoter cognitive functions in mouse models,  
612 serving as a novel target for AD therapy (Baranger et al., 2016).

613

614 Finally, we explored the human-mice relevance for certain AD-associated gene signatures and molecular  
615 pathways. Despite differences in the species and ages between the two datasets, several genes encoding  
616 heat shock proteins (e.g., *HSP90AA1*, *HSPH1*) were upregulated across multiple cell types in the EOAD  
617 mouse model and the human hippocampus (**Figure 7E**). The elevated expression of the chaperon system  
618 potentially serves as a compensatory mechanism to reduce the formation of toxic oligomeric assemblies  
619 in AD brains (Arawaka et al., 2010), further validating the dysfunction of proteostasis as a molecular marker  
620 of AD (Cornejo and Hetz, 2013). Meanwhile, we identified down-regulated genes in both human and mice  
621 (**Figure 7F**). One of the examples, *PLP1*, was reported as a subtype-specific driver gene contributing to  
622 AD pathogenesis (Neff et al., 2021). Another gene, *PDE10A*, plays a key role in the promotion of neuronal

623 survival, with its reduction detected in multiple neurodegenerative diseases (*e.g.*, Huntington's disease  
624 (Niccolini et al., 2015a), Parkinson's disease (Niccolini et al., 2015b)). Importantly, the above-mentioned  
625 trends were readily validated by another recently published single-cell dataset investigating Alzheimer's  
626 disease in the human prefrontal cortex (Morabito et al., 2021) (**Figure S15**). In summary, the human-mice  
627 relevance analysis further advances our current understanding of genetic programs associated with  
628 Alzheimer's pathogenesis.  
629

630

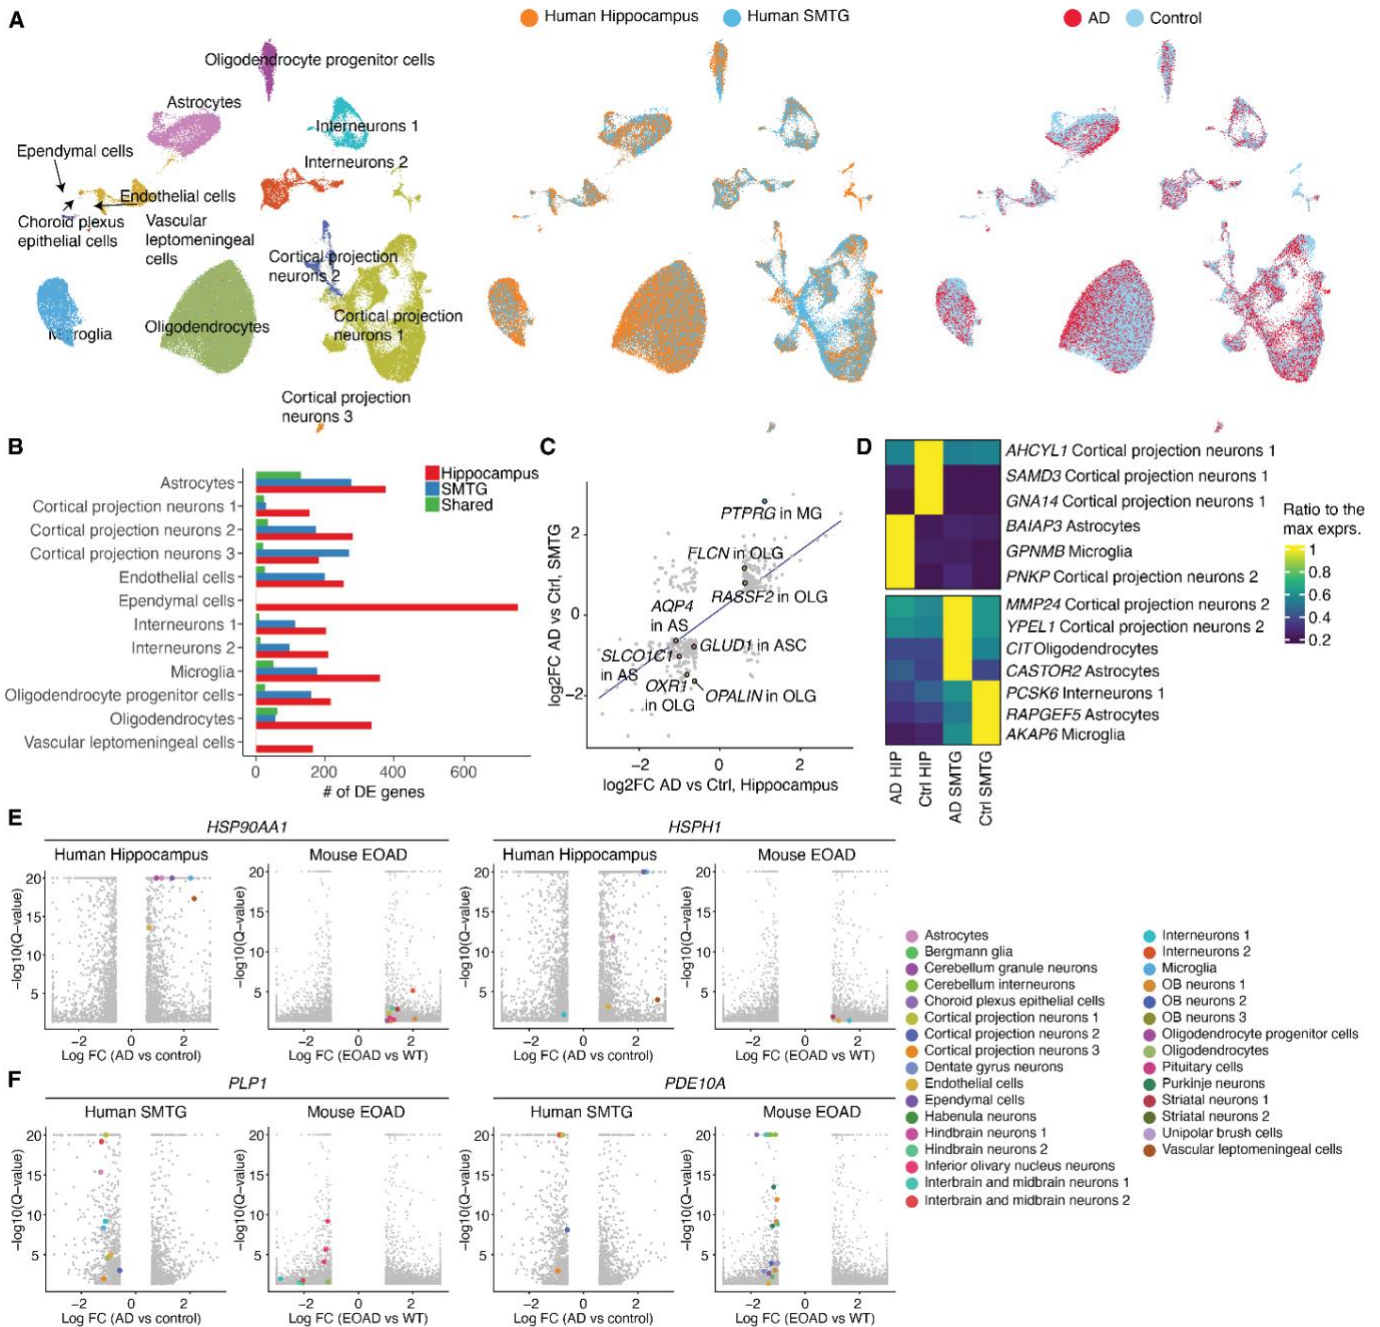

631

632

633

634

635

636

637

638

639

**Figure 7. Identifying AD pathogenesis-associated gene expression signatures across regions and cell types in human brains.**

(A) UMAP visualization of single-cell transcriptomes of all human brain cells, colored by main cell types (left), region (middle) and conditions (right).

(B) Bar plot showing the number of differentially expressed genes between AD and control samples in each cell type. DE genes are colored by whether they are unique to each region or shared between two regions. Of note, choroid plexus epithelial cells and vascular leptomenigeal cells were not included into the differential gene expression analysis in SMTG due to their low cell numbers.

640 (C) We detected 394 DE genes significantly changed within the same main cell type in both regions. The  
641 scatterplot shows the correlation of the log<sub>2</sub>-transformed fold changes of these 394 shared DE genes in  
642 Hippocampus (x-axis) and in SMTG (y-axis). Key genes are annotated and colored by their corresponding  
643 main cell types. AS, astrocytes; MG, microglia; OLG, oligodendrocytes.  
644 (D) Heatmaps showing examples of region-specific DE genes for the hippocampus (left) and SMTG  
645 (bottom). Gene expressions were quantified as transcripts per million in the corresponding cell types in  
646 each group, and normalized to the maximum expression across groups.  
647 (E-F) Volcano plots showing the examples of top differentially expressed (DE) genes between the AD and  
648 control samples across main cell types in human brains or between EOAD and WT samples across cell  
649 subclusters in mouse brains. Highlighted genes are colored by the main cell type identity.  
650



## 651 Discussion

652

653 In this study, we obtained a global view of aging and AD pathogenesis-associated cell population  
654 dynamics, by profiling ~1.5 million single-cell transcriptomes at full gene body coverage and ~380,000  
655 single-cell chromatin accessibility profiles across the entire mammalian brains spanning various age and  
656 genotype groups. With the resulting datasets, we identified over 300 cellular subtypes across the brain,  
657 including extremely rare cell types (e.g., pinealocytes, tanycytes) representing less than 0.01% of the brain  
658 cell population. In addition, we detected region-specific aging and AD effects with high-resolution spatial  
659 transcriptomic analysis and explored the cell-type-specific manifestation of aging and AD-associated  
660 molecular signatures. With the *EasySci* method, we introduced a technical framework for individual  
661 laboratories to generate gene expression and chromatin accessibility profiles from millions of single cells  
662 cost-effectively. We have made the *EasySci* pipeline, detailed experimental protocols, computation scripts,  
663 and datasets freely available to facilitate further exploration of the techniques and datasets.

664

665 As illustrated by our sub-cluster level analysis, the effects of aging and AD on the global brain cell  
666 population are highly cell-type-specific. While most brain cell types stay relatively stable under various  
667 conditions, we identified many cell subtypes that are significantly changed (over two-fold change) in aged  
668 and AD model brains, most of which were rare cell types and thus presumably missed in conventional  
669 “shallow” single-cell analysis. For example, the aged brain is characterized by the depletion of both rare  
670 neuronal progenitor cells and differentiating oligodendrocytes, associated with the enrichment of a *C4b+*  
671 *Serpina3n+* reactive oligodendrocyte subtype surrounding the subventricular zone (SVZ), suggesting a  
672 potential interplay between oligodendrocytes, local inflammatory signaling and the stem cell niche.

673

674 The lack of reliable mouse models remains one of the biggest challenges in studying late-onset Alzheimer’s  
675 disease. The novel APOE\*4/Trem2\*R47H model aims to overcome this limitation by introducing two of the  
676 strongest late-onset Alzheimer’s disease-associated mutations (Karch and Goate, 2015). However, limited  
677 validation is available to assess whether this novel model shows any characteristics of Alzheimer’s  
678 disease. Here we observed overall concordant molecular and cell population dynamics between the well-  
679 established 5xFAD and the novel APOE\*4/Trem2\*R47H model, which emphasizes that the novel LOAD  
680 model indeed shows signs of Alzheimer’s disease. For example, we observed shared subtypes that were  
681 depleted (e.g., *mt-Cytb+* *mt-Rnr2+* choroid plexus epithelial cell) or enriched (e.g., *Col25a1+* *Ndrgr1+*  
682 interbrain and midbrain neuron) in both early- and late-onset AD mutant brains, validated by single-cell  
683 RNA-seq from both sexes as well as spatial transcriptomics analysis. On the other hand, differences were  
684 also observed between the two AD models, as expected by the different onset times. Most notably, the  
685 missing of the disease-associated microglia population increase in the LOAD model could be explained by  
686 the lack of amyloid deposition in the mouse model (Kotredes et al., 2021) or by genetic perturbations, as  
687 both Trem2 and Apoe play a role in the activation of this cell population (Keren-Shaul et al., 2017). To  
688 answer this question, further studies are needed to characterize APOE\*4/Trem2\*R47H mouse models at  
689 late stages.

690

691 In addition, we further explored AD-associated gene signatures in human brains by profiling over 100,000  
692 single nucleus transcriptomes from twenty-four human brain samples from control and AD patients and  
693 two anatomical locations. While most AD-associated gene dynamics are highly cell-type- and region-  
694 specific, we identified dysregulated genetic signatures that are conserved between different anatomical  
695 locations in the human brains. Moreover, integrating the human and mouse brain datasets further revealed

696 molecular pathways shared between human AD patients and mouse AD models, which could advance our  
697 knowledge of biomarkers for Alzheimer's diagnosis.

698

699 In summary, this study demonstrated the potential of novel 'high-throughput' single-cell genomics for  
700 quantifying the dynamics of rare cell types and novel subtypes associated with development, aging, and  
701 disease. We anticipate that further development of high-throughput single-cell profiling strategies and  
702 computation approaches will enable a comprehensive view of cell-type-specific dynamics across all  
703 mammalian organs through "saturate sequencing", which may be especially critical for identifying rare cell  
704 types in human samples.

705

706

---

## 707 Endnotes

708

709 **Acknowledgments:** We thank all members of the Cao lab for helpful discussions and feedback. We thank  
710 Dr. Jay Shendure (University of Washington) for insightful feedback on this work. We also thank members  
711 of the Rockefeller University Genomics Resource Center and Comparative Bioscience Center for their  
712 exceptional assistance with library sequencing and animal maintenance.

713

714 **Funding:** This work was funded by grants from NIH (DP2HG012522, R01AG076932 and RM1HG011014  
715 to J.C.; P30AG072946 and P01AG078116 to P.T.N.; R01AG072758 to L.G.) and the Sagol Network  
716 GerOmic Award for J.C.

717

718 **Author contributions:** J.C. and W.Z.. conceptualized and supervised the project. J.L. and A.S. developed  
719 the experimental and computation pipeline for *EasySci-RNA* profiling of all samples. G.B. and Z.L.  
720 developed the experimental and computation pipeline for *EasySci-ATAC* profiling of all samples. A.A.  
721 performed the 10x Visium spatial transcriptomics experiment. S.A. and P.N. processed the human brain  
722 samples for single-cell profiling experiment. A.S. and Z.L. performed the downstream analysis with  
723 assistance from E.M., A.L., A.E., Z.X., and Z.Z. J.C., W.Z., Z.L., and A.S. wrote the manuscript with input  
724 and biological insight from P.N., L.G. and other co-authors.

725

726

727 **Supplementary Figures**

728

| Key steps                              | sci-RNA-seq3                                                                                        | EasySci-RNA optimizations                                                                                                    | Improvements                                                                                                     |
|----------------------------------------|-----------------------------------------------------------------------------------------------------|------------------------------------------------------------------------------------------------------------------------------|------------------------------------------------------------------------------------------------------------------|
| Nuclei extraction                      | Nuclei lysis buffer (1% SUPERase)                                                                   | EZ lysis buffer (1% DEPC + 0.1% SUPERase)                                                                                    | Lower mRNA degradation and reduced cost                                                                          |
| Nuclei fixation                        | 4% Paraformaldehyde (15min)                                                                         | 0.1% formaldehyde (10min)                                                                                                    | Higher efficiency, less nuclei clumping                                                                          |
| Nuclei storage                         | Flash freezing                                                                                      | Slow freezing (in 10% DMSO)                                                                                                  | Higher cell recovery rate                                                                                        |
| Indexed reverse transcription          | Enzyme: SuperScript IV<br>Primer: Oligo-dT primer                                                   | Enzyme: Maxima RT<br>Primer: Oligo-dT + indexed random primer                                                                | Higher efficiency, reduced cost and full gene body coverage                                                      |
| Indexed ligation                       | Enzyme: quick ligase<br>Primer: sci-RNA-seq3 primer                                                 | Enzyme: T4 ligase,<br>Primer: re-designed primer with longer annealing length and additional chemical modifications          | Higher cell recovery rate, reduced primer dimers in the final library, and shorter sequencing length requirement |
| Second strand synthesis                | NEB Second strand synthesis module                                                                  | NEBnext Ultra II Non-directional RNA second strand synthesis module; Ampure beads purification after Second strand synthesis | Shorter reaction time; higher efficiency and reduced primer dimers in the final library                          |
| Tagmentation                           | Loaded Tn5 from Illumina (not commercially available); Ampure beads purification after tagmentation | Custom loaded Tn5 enzyme; no Ampure beads purification after tagmentation                                                    | Easy access to the reagent; higher efficiency                                                                    |
| Library amplification and purification | Two rounds of Ampure beads purification                                                             | One round of Ampure beads purification                                                                                       | Reduced cost                                                                                                     |
| Sequencing data processing             | A custom pipeline for processing single-read RNA-seq data for gene counting                         | A new pipeline for processing paired-end RNA-seq data for gene counting at exon resolution                                   | Exon level expression quantification                                                                             |

729

730

731

732

**Figure S1. Summary of key optimizations of *EasySci-RNA* compared to published single-cell RNA-seq by combinatorial indexing (sci-RNA-seq3 (Cao et al., 2019)).**

733

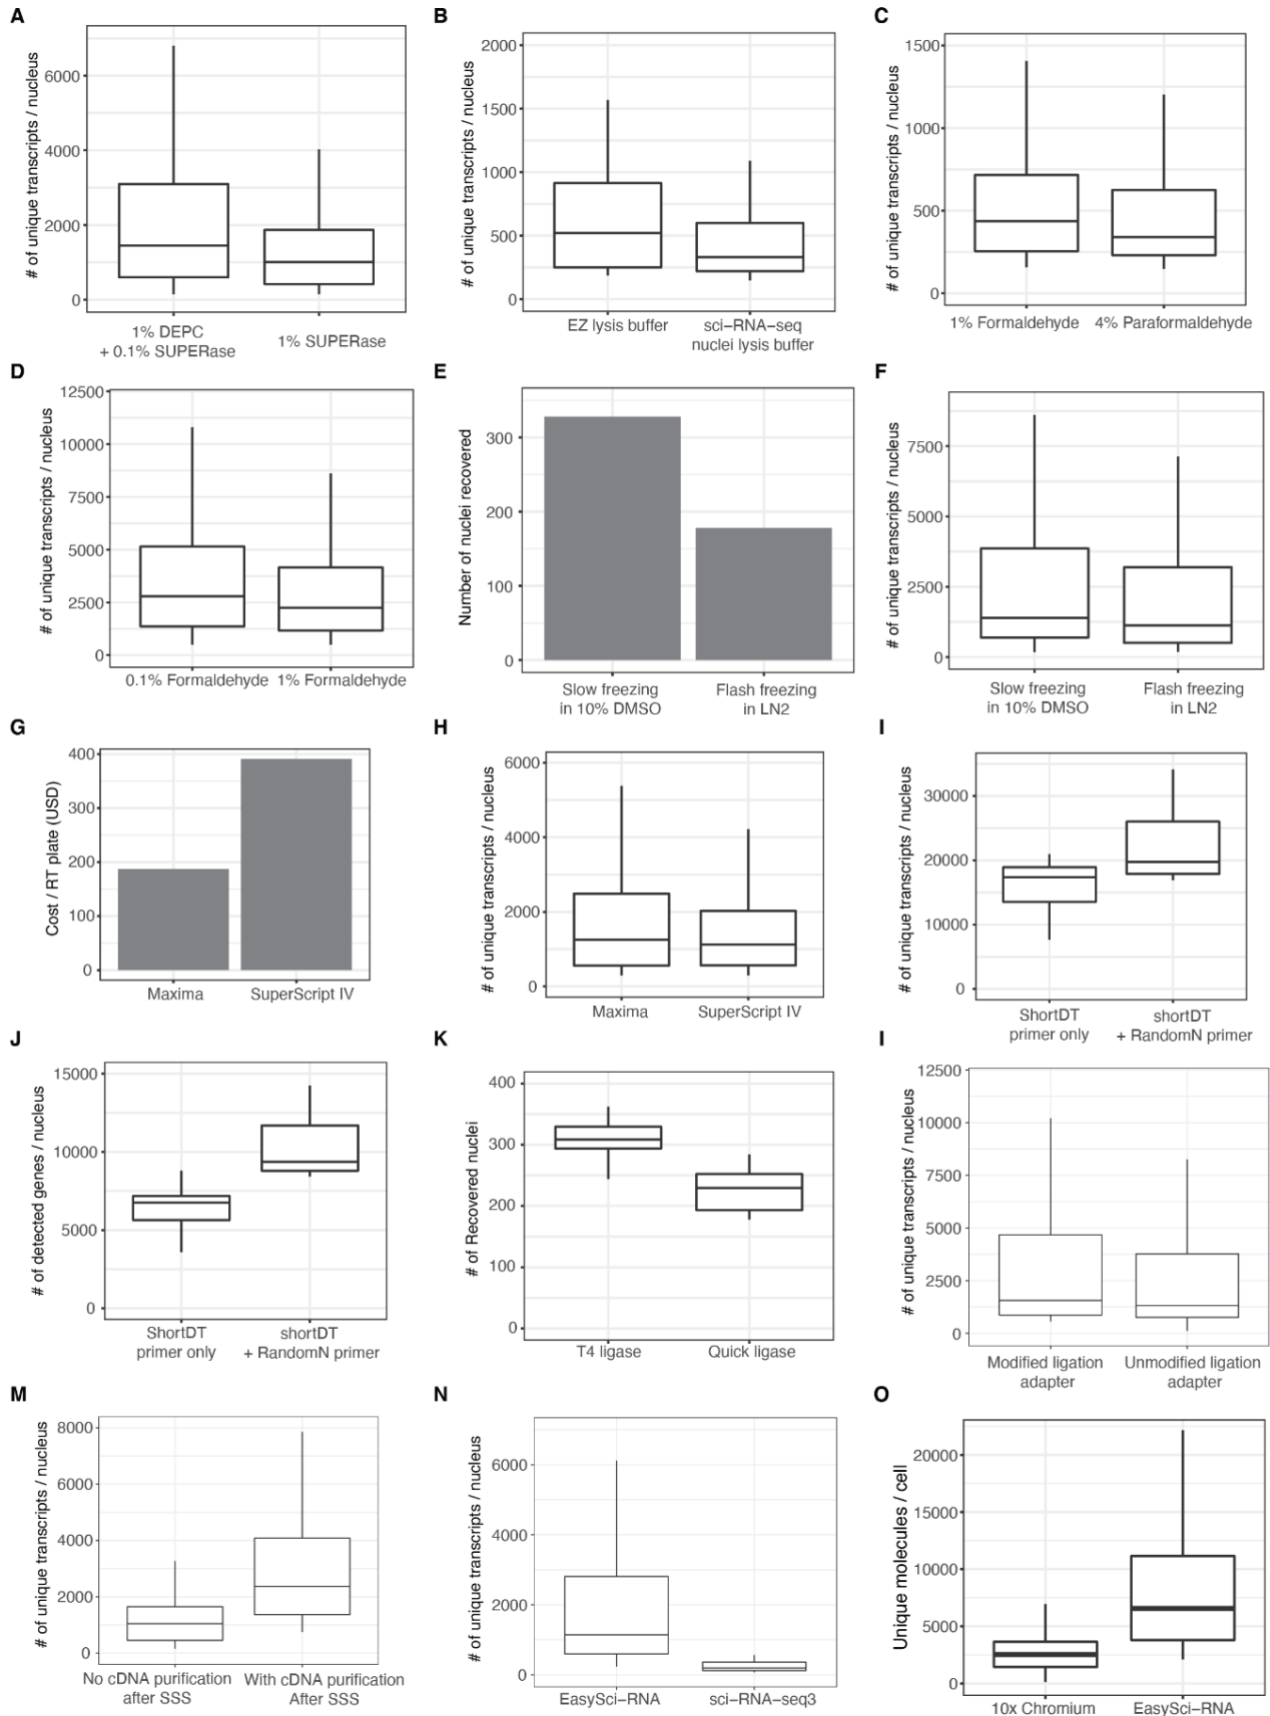

734 **Figure S2. Representative examples showing the performance of optimized conditions of *EasySci-***  
735 ***RNA*.**

736 (A-B) Box plots showing the number of unique transcripts detected per nucleus in different lysis conditions:  
737 1% DEPC vs. no DEPC in lysis buffer (A); EZ lysis buffer vs. nuclei lysis buffer used in the published sci-  
738 RNA-seq3 (Cao et al., 2019) (B). For all box plots in this figure: middle lines, medians; upper and lower  
739 box edges, first and third quartiles, respectively; whiskers, 1.5 times the interquartile range.

740 (C-D) Box plot showing the number of unique transcripts detected per nucleus across different fixation  
741 conditions: 1% formaldehyde vs 4% paraformaldehyde (C); 0.1% formaldehyde vs. 1% formaldehyde (D).

742 (E-F) We compared two conditions for preserving the fixed nuclei. The slow freezing condition (in 10%  
743 DMSO) outperformed the flash freezing condition in sci-RNA-seq3 (Cao et al., 2019) by increasing the  
744 number of nuclei recovered in the experiment (E) and the number of unique transcripts detected per  
745 nucleus (F).

746 (G-H) Maxima reverse transcriptase greatly reduces the enzyme cost (G) without affecting the number of  
747 transcripts detected per nucleus (H).

748 (I-J) We included both short oligo-dT and random primers in reverse transcription to increase the number  
749 of unique transcripts (I) and genes (J) detected per nucleus.

750 (K) *EasySci-RNA* used T4 ligase instead of quick ligase for a higher recovery rate of nuclei.

751 (L) We used chemically modified ligation primers in *EasySci* (Method), which greatly reduced primer dimers  
752 in the following PCR reaction and slightly increased the number of unique transcripts detected per nucleus.

753 (M) Additional cDNA purification step after second strand synthesis increased the number of unique  
754 transcripts per nucleus.

755 (N) We compared the efficiency of the novel *EasySci-RNA* method with the sci-RNA-seq3 using mouse  
756 brain nuclei. The raw data was subset to 4,448 reads/cell to remove any potential bias from sequencing  
757 depth.

758 (O) Box plot showing the number of unique transcripts detected per mouse brain nucleus in a deep  
759 sequenced dataset comparing *10X genomics* and a small-scale *EasySci-RNA* library at similar sequencing  
760 depth (~ 20,000 raw reads/cell, Methods).

761



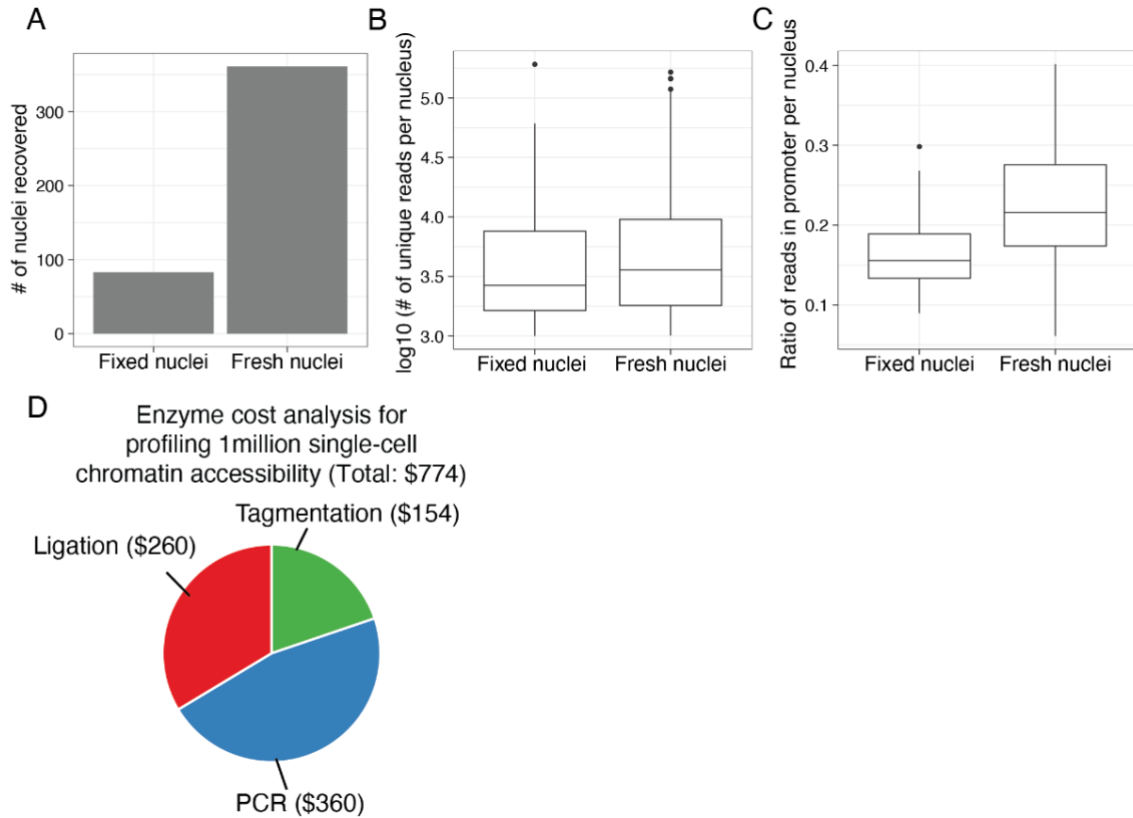

762

763

764

765

766

767

768

769

770

771

**Figure S3. Representative examples showing the performance of optimized conditions of *EasySci-ATAC*.**

(A-C) We compared two fixation conditions: nuclei were either fixed with 1% formaldehyde for 10 minutes at room temperature or directly used for tagmentation without fixation. The unfixed condition outperformed the fixed condition by increasing cell recovery (A), the number of reads (B), and the ratio of reads in promoters (C) per nucleus. For all box plots in this figure: middle lines, medians; upper and lower box edges, first and third quartiles, respectively; whiskers, 1.5 times the interquartile range; circles, outliers.

(D) Pie chart showing the estimated enzyme cost compositions of library preparation for profiling 1 million single-cell chromatin accessibility profiles using *EasySci-ATAC*.

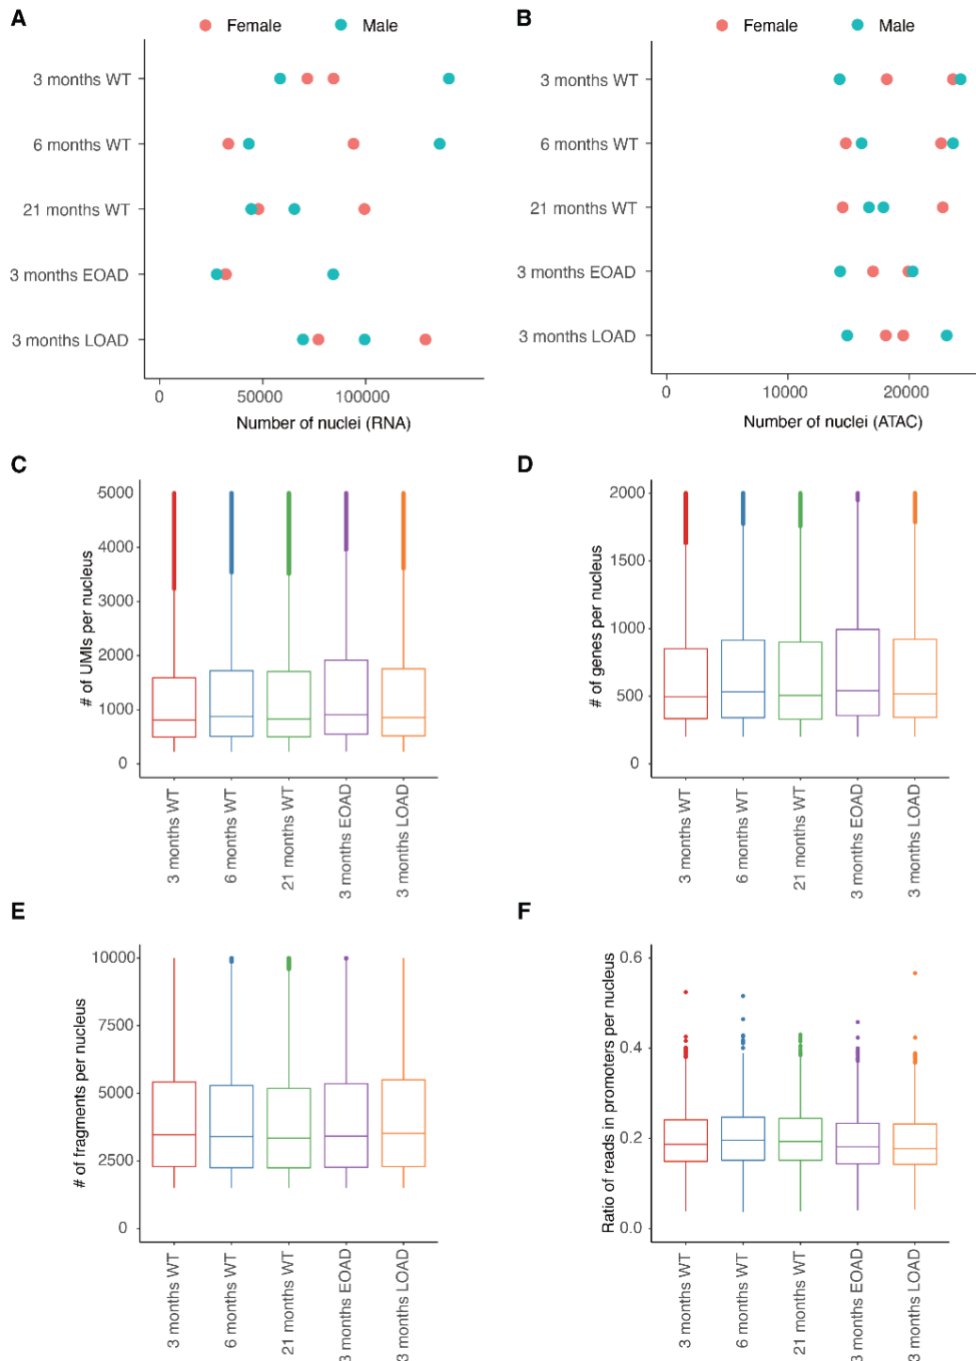

772

773

774

775

776

777

778

779

**Figure S4. Performance of *EasySci-RNA* and *EasySci-ATAC* profiling of mouse brain samples.**

(A-B) Scatter plots showing the number of single-cell transcriptomes (A) and single-cell chromatin accessibility (B) profiled in each mouse individual across five conditions, colored by sex. Of note, the number of cells recovered from two mouse individuals in the EOAD model (RNA) are very close and can not be separated in the plot.

(C-D) Box plots showing the number of unique transcripts (C) and genes (D) detected per nucleus in each condition profiled by *EasySci-RNA*. For all box plots: middle lines, medians; upper and lower box edges,

780 first and third quartiles, respectively; whiskers, 1.5 times the interquartile range; and circles are outliers.  
781 (E-F) Box plots showing the number of unique fragments (E) and the ratio of reads in promoters (F) per  
782 cell in each condition profiled by *EasySci-ATAC*.  
783

784

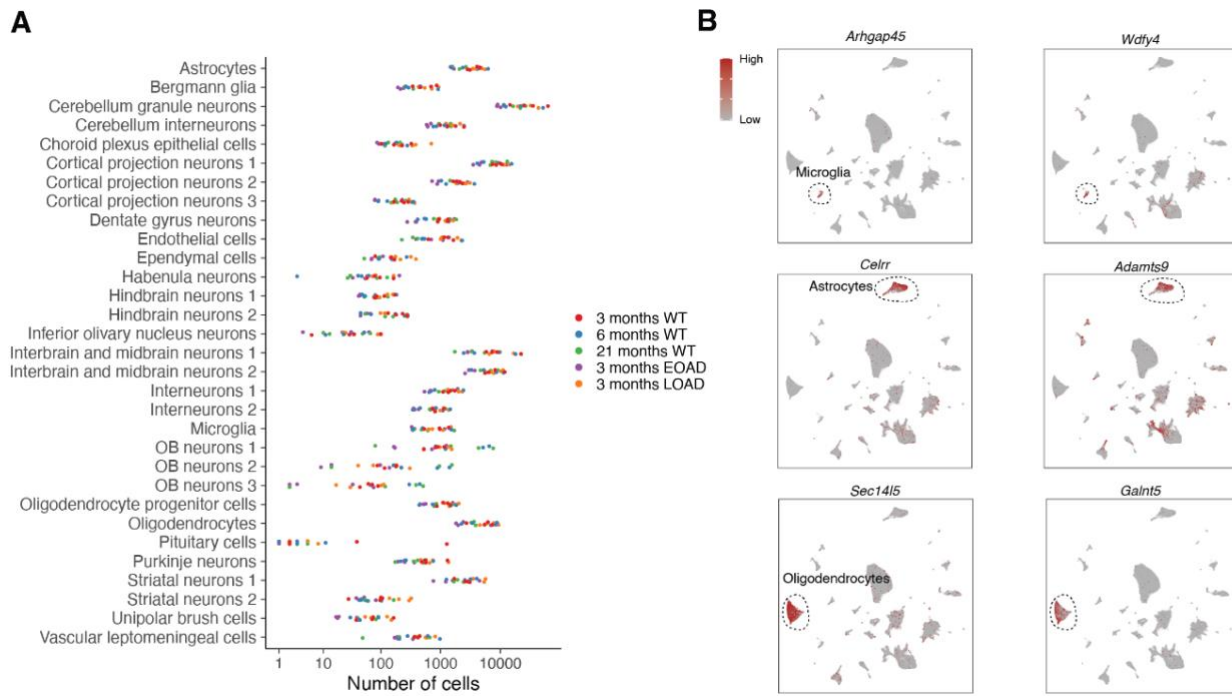

785

786

787

788

789

790

791

**Figure S5. Identification of main brain cell types and cell-type-specific markers by EasySci-RNA.**

(A) Dot plot showing the number of single-cell transcriptomes recovered from each individual, colored by conditions.

(B) UMAP plots showing the gene expression of identified novel markers for microglia (*Arhgap45*, *Wdfy4*), astrocytes (*Clerr*, *Adamts9*), and oligodendrocytes (*Sec14l5*, *Galnt5*). UMI counts for these genes are scaled by the library size, log-transformed, and then mapped to Z-scores.

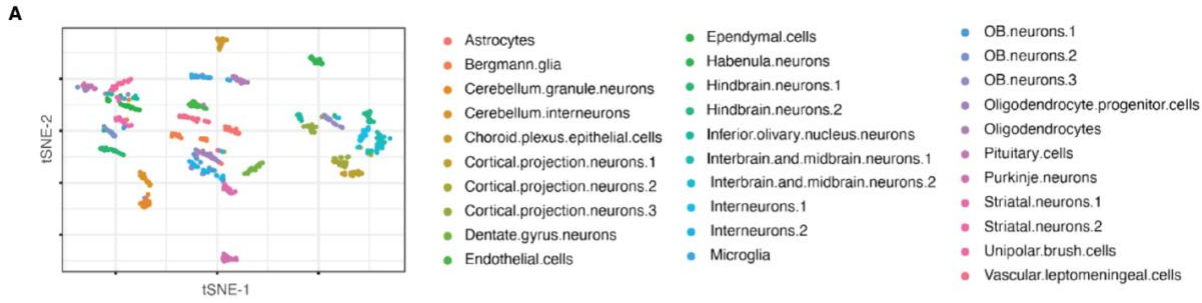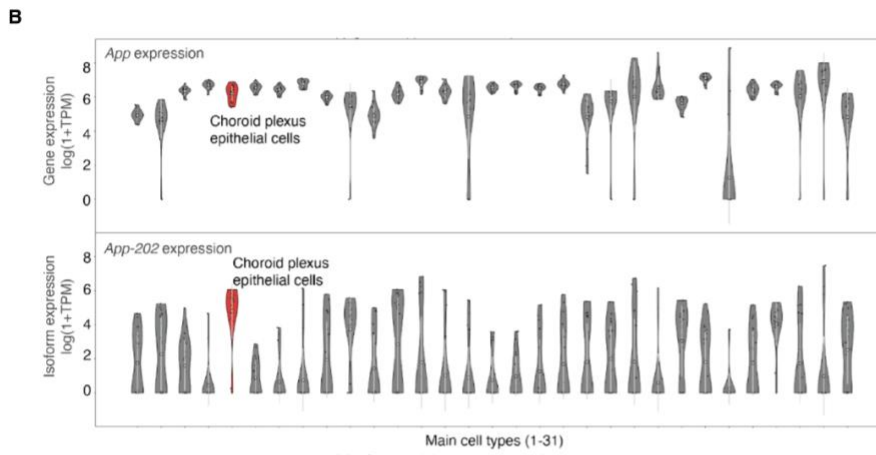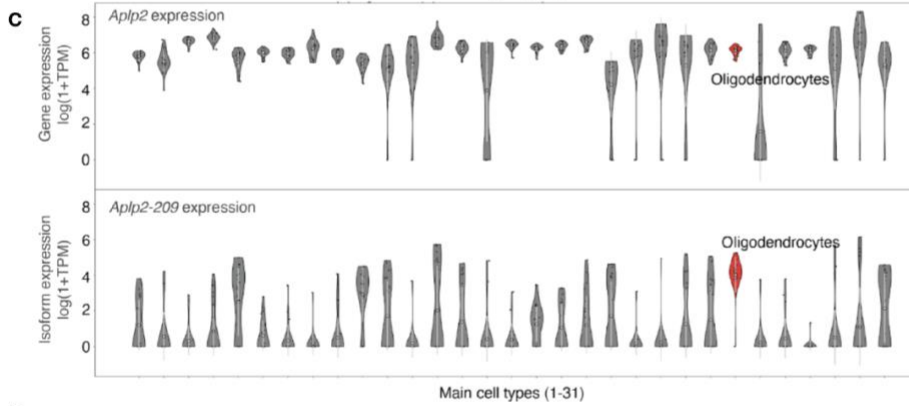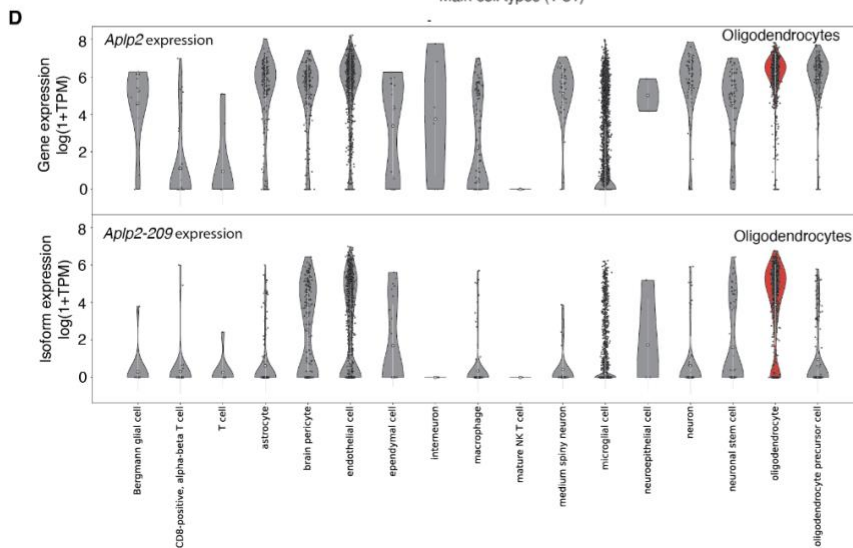



793 **Figure S6. Identification of cell-type-specific isoforms in the mouse brain.**

794 (A) We aggregated randomN primed *EasySci-RNA* reads from each main cell type in every mouse  
795 individual, yielding 613 pseudocells. The t-SNE plot showed the separation of main cell types by isoform  
796 expression.

797 (B) Violin plots showing the expression of gene *App* and isoform *App-202* across main cell types.

798 (C-D) Violin plots showing the expression of gene *Ap1p2* and isoform *Ap1p2-209* across main cell types in  
799 the *EasySci* dataset (C) and the Tabula Muris Senis mouse aging atlas dataset (Tabula Muris Consortium,  
800 2020) (D). White circles represent the normalized expression of genes and isoforms ( $\log(1+TPM)$ ). White  
801 bars represent standard deviation.

802

803

804

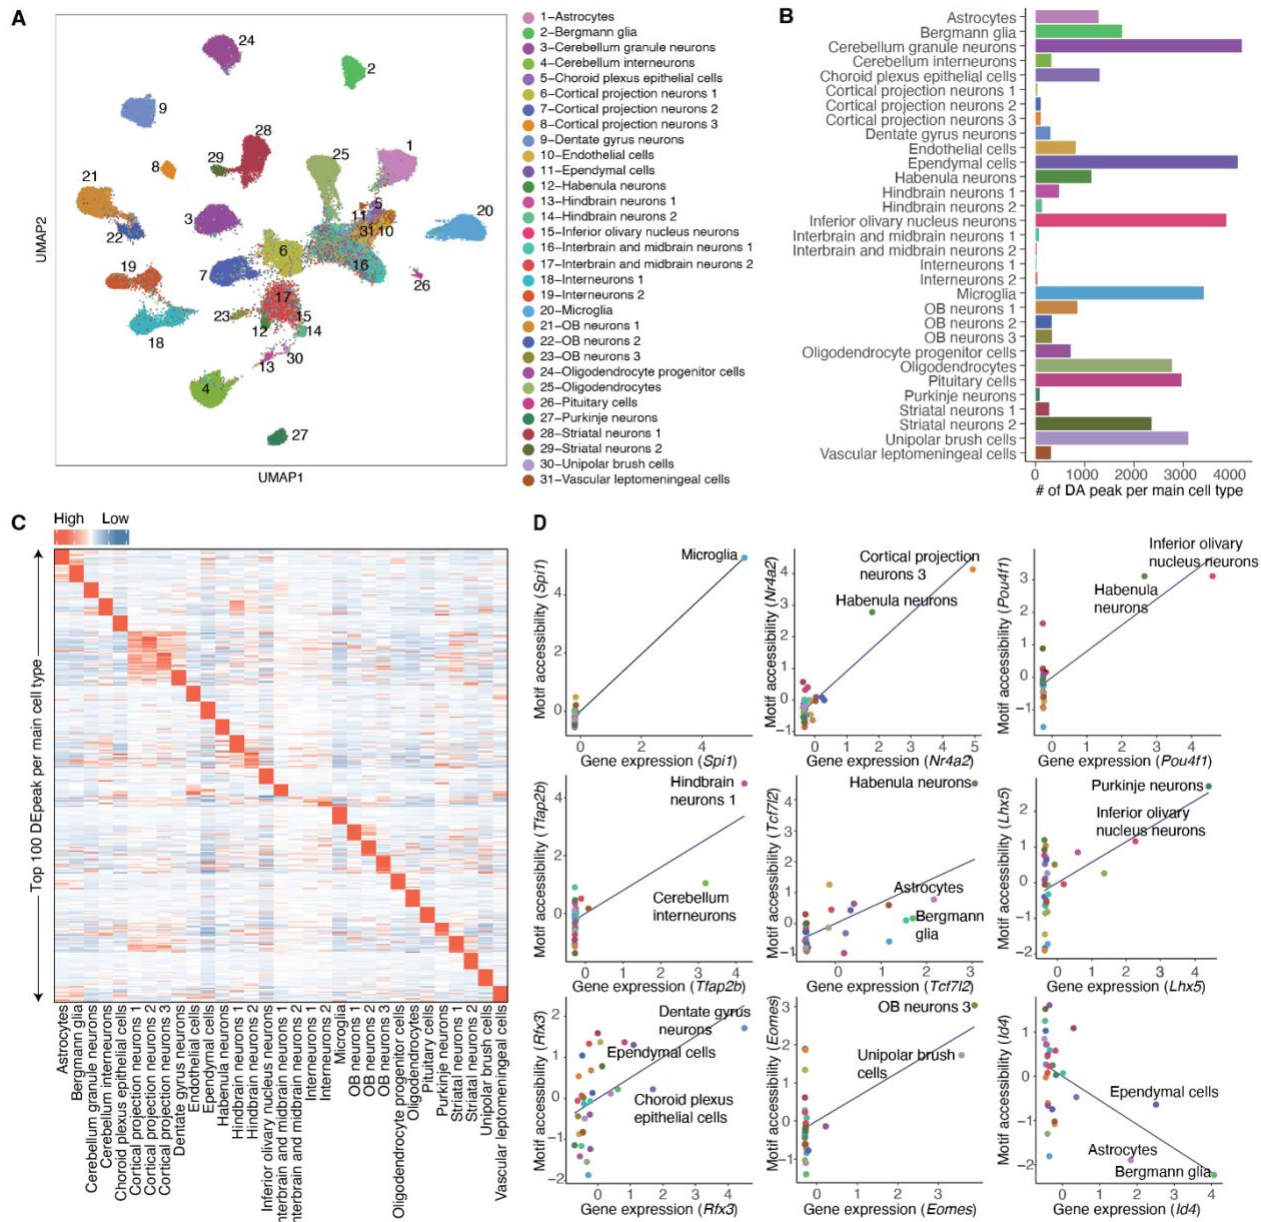

805 **Figure S7. Characterization of cell-type-specific chromatin accessibility and key TF regulators**  
 806 **using *EasySci-ATAC*.**

807 (A) UMAP plot of the *EasySci-ATAC* dataset subsampled to 5,000 cells per cell type (or all cells if the  
 808 number of cells is less than 5,000), colored by main cell types in Figure 2C. The analysis was performed  
 809 using the peak-count matrix without integration with the *EasySci-RNA* dataset.

810 (B) Bar plot showing the number of cell-type-specific peaks for each main cell type (defined as differential  
 811 accessible (DA) peaks across main cell types with q-value < 0.05 and TPM > 20 in the target cell type).

812 (C) Heatmap showing the aggregated accessibility of top 100 DA peaks per cell type (ranked by fold  
 813 change between the maximum and the second accessible cell type). Unique counts for cell-type-specific  
 814 peaks are first aggregated, normalized by the library size, and then mapped to Z-scores.

815 (D) Scatter plots showing the correlation between gene expression and motif accessibility of cell-type  
816 specific TF regulators, together with a linear regression line. TF gene expressions are calculated by  
817 aggregating scRNA-seq gene counts for each main cluster, normalized by the library size, and then  
818 mapped to Z-scores. TF motif accessibilities are quantified by chromVar (Schep et al., 2017), then  
819 aggregated per main cell type and mapped to Z-scores (**Methods**).

820

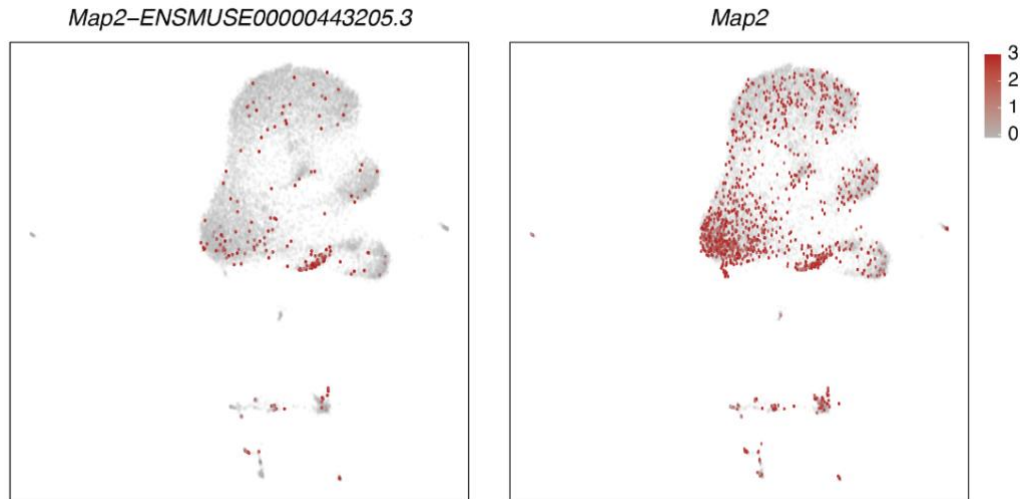

821

822

823

824

825

826

827

**Figure S8. Characterizing microglia subtypes incorporating both gene and exon level expression.** UMAP plots same as Figure 3A based on both gene and exon-level expression, showing the specific expression of an example exon marker *Map2-ENSMUSE00000443205.3* (left) of microglia sub-cluster 8 and the lack of specificity of its corresponding gene *Map2* (right). Single-cell gene/exon expression was normalized first by library size, log-transformed, and then scaled to Z-scores.

828

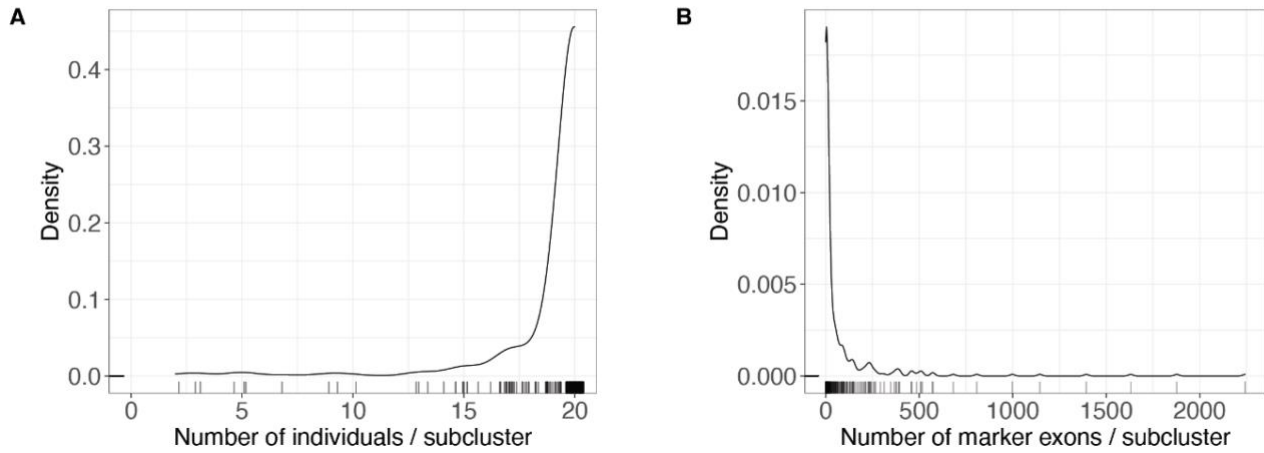

829

830

**Figure S9. Characteristics of subclusters.**

831

(A) Density plot showing the number of individuals per subcluster. The rug plot below the density plot represents the individual subclusters.

832

833

(B) Density plot of the number of marker exons per subcluster. The rug plot below the density plot represents the individual subclusters.

834

835



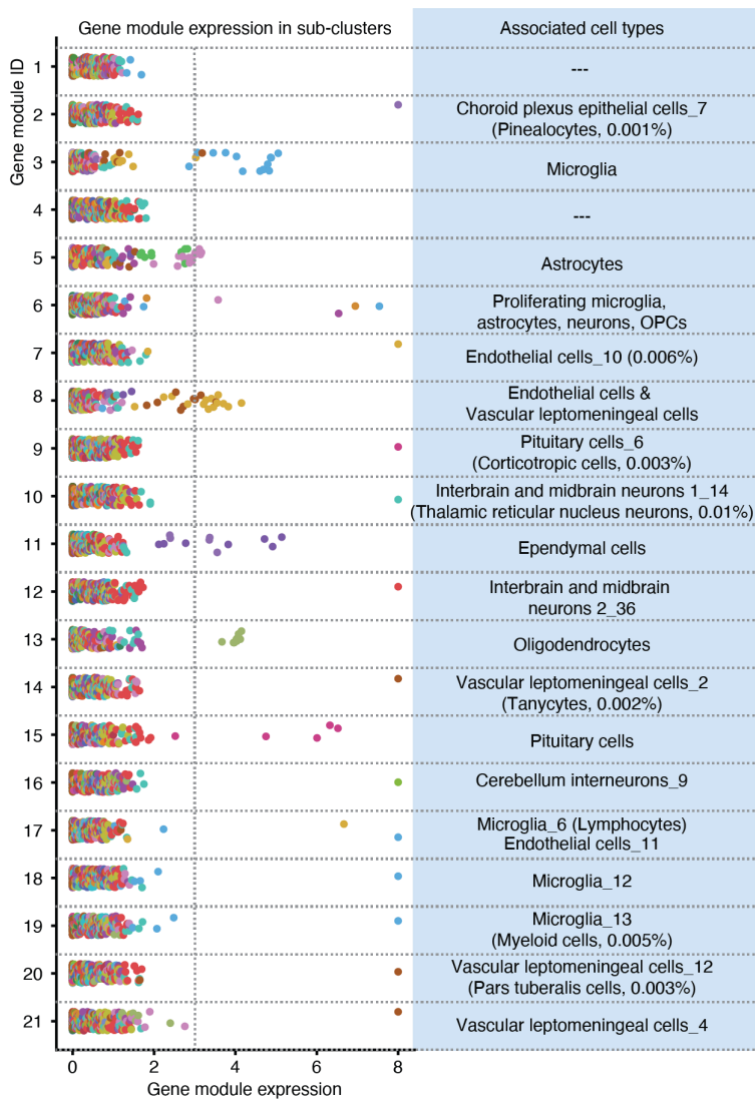

836

837

838

839

840

841

**Figure S10. Characterization of cell types/subtypes by gene module expression.** Scatter plot showing the expression of each gene module across 359 sub-clusters. The associated cell types were annotated on the plot. UMI counts for genes from each gene module are scaled for library size, log-transformed, aggregated, and then mapped to Z-scores.

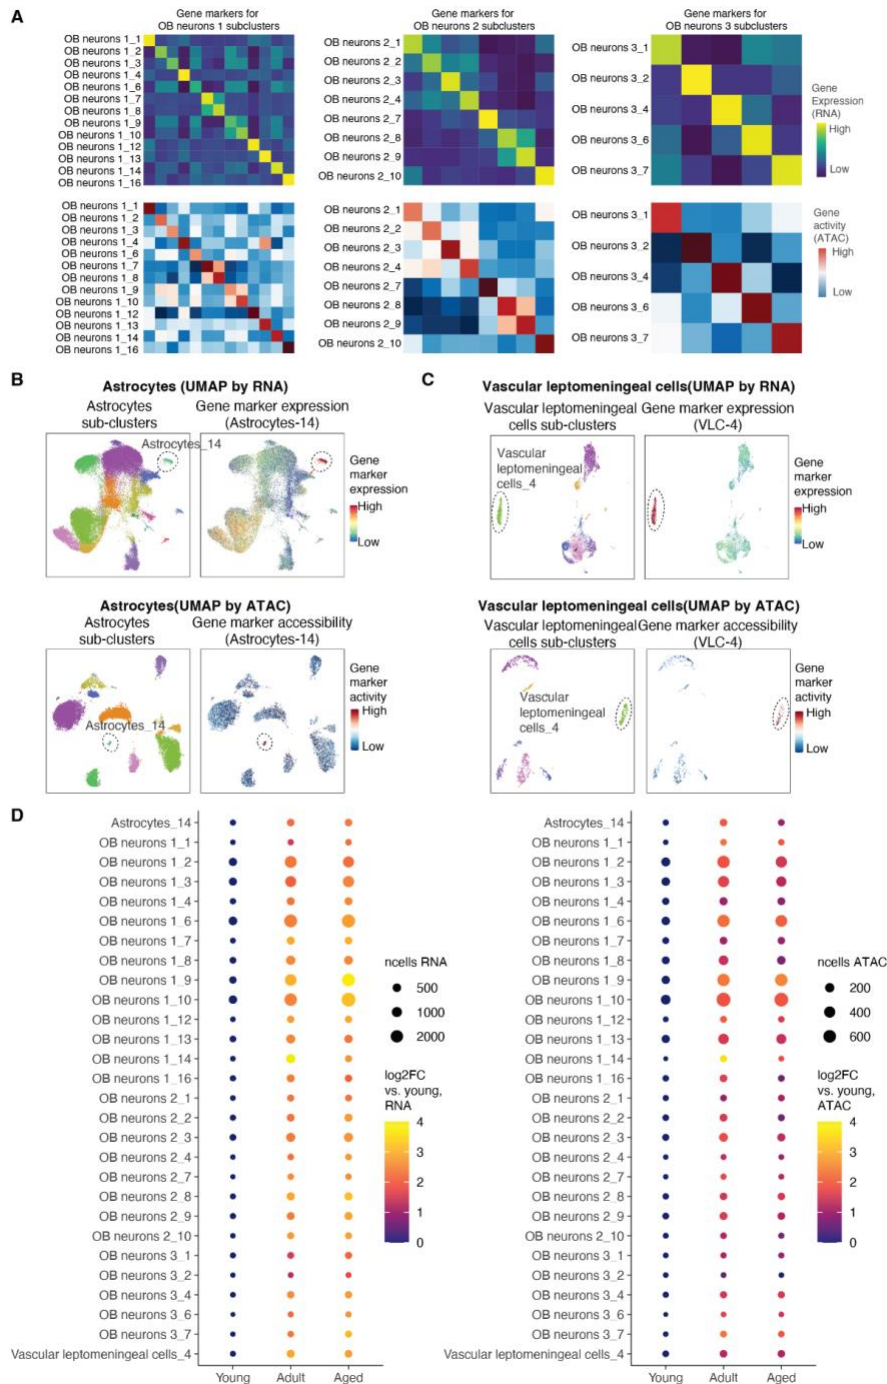

842

843

844

845

846

847

848

849

850

851

**Figure S11. Identification of cell subtypes underlying olfactory bulb expansion from the young to adult stage in *EasySci-RNA* and *EasySci-ATAC*.**

(A) Heatmaps showing the aggregated gene expression (top) and gene body accessibility (bottom) of sub-cluster specific gene markers (columns) in OB expansion-associated sub-clusters (rows) from OB neurons 1 (left), OB neurons 2 (middle), and OB neurons 3 (right). UMI counts for genes or reads overlapping with gene bodies were aggregated for each sub-cluster, normalized first by the total number of reads, column centered, and scaled across all cell sub-clusters.

(B-C) UMAP visualization showing astrocytes subtype 14 (B) and vascular leptomenigeal cells subtype 4 (VLC-4, C), colored by subcluster ID in *EasySci-RNA* (top left) and *EasySci-ATAC* (bottom left), the

852 aggregated gene expression (top right) and gene body accessibility (bottom right) of sub-cluster specific  
853 gene markers.

854 (D) For the OB expansion-related sub-clusters, we plotted their log<sub>2</sub>-transformed fold changes between  
855 each age group and the young mice, profiled by *EasySci-RNA* (left) and *EasySci-ATAC* (right).

856

857

858

859

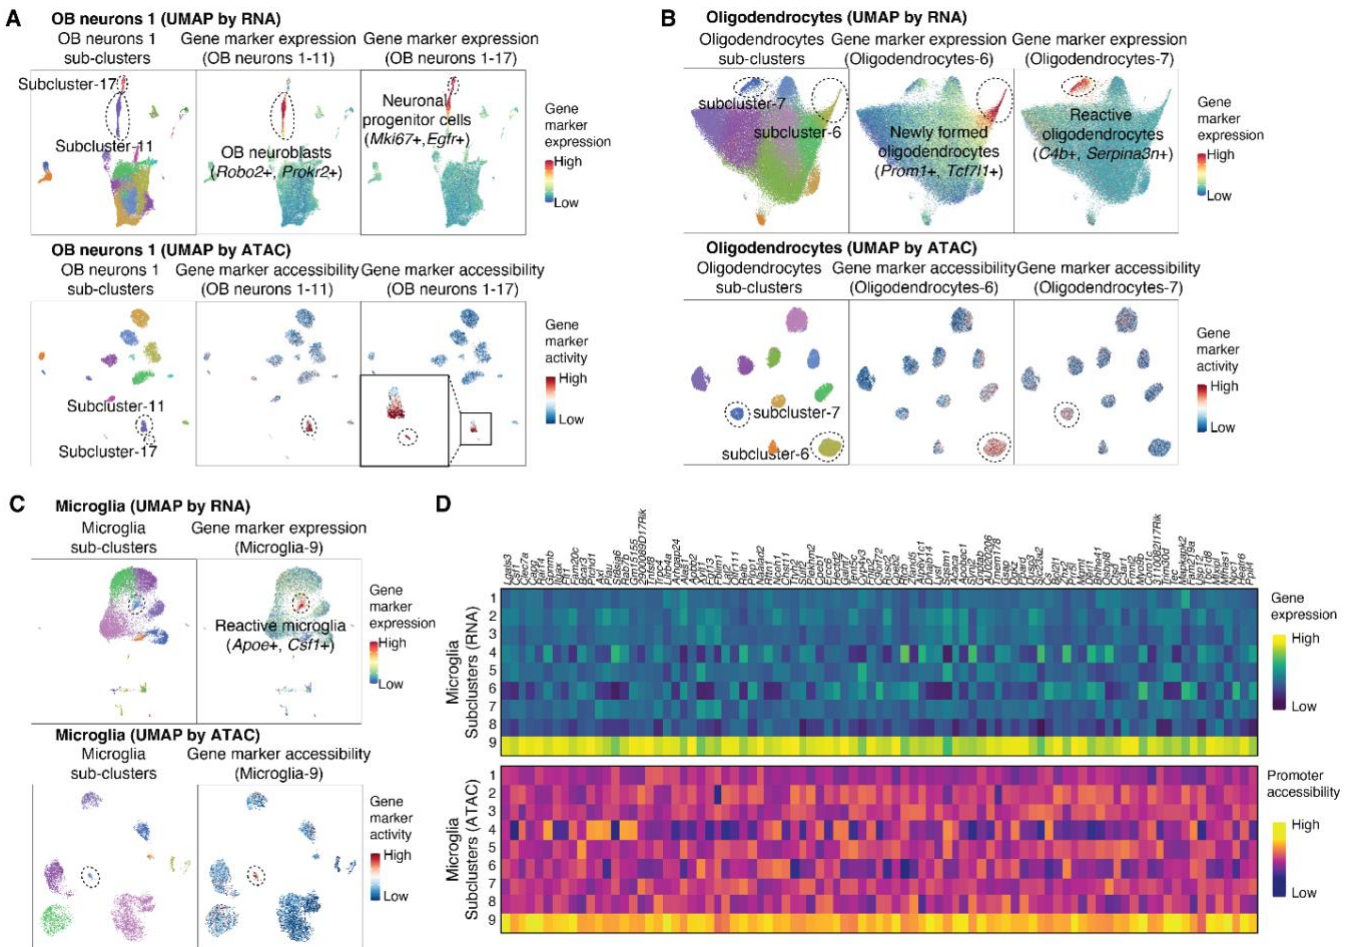

860

861

862

863

864

865

866

867

868

869

870

871

872

873

874

875

876

877

878

879

**Figure S12. Identifying aging-associated sub-clusters related to neurogenesis, oligodendrogenesis, and inflammation in *EasySci-ATAC*.**

(A) UMAP visualization showing OB neurons 1-11 and OB neurons 1-17 identified from *EasySci-RNA* (top) and *EasySci-ATAC* (bottom), colored by subcluster id (left), aggregated gene expression or gene activity of OB neurons 1-11 gene markers (middle) and OB neurons 1-17 gene markers (right).

(B) UMAP visualization showing oligodendrocytes-6 and oligodendrocytes-7 identified from *EasySci-RNA* (top) and *EasySci-ATAC* (bottom), colored by subcluster id (left), aggregated gene expression or gene activity of oligodendrocytes-6 gene markers (middle) and oligodendrocytes-7 markers (right).

(C) UMAP visualization showing microglia-9 identified from *EasySci-RNA* (top) and *EasySci-ATAC* (bottom), colored by subcluster id (left), aggregated gene expression or gene activity of microglia-9 gene markers (right). Subcluster marker genes were identified by differential expression analysis using scRNA-seq data (**Methods**).

(D) Heatmap showing the gene expression (top) and the promoter accessibility (bottom) of microglia-9 enriched genes across subclusters. The *EasySci-RNA* data (UMI count matrix) and *EasySci-ATAC* data (read count matrix) were aggregated per sub-cluster, normalized by the total number of reads, column centered, and scaled. Of note, rare subclusters from RNA-seq data that were not detected in ATAC-seq data were not included in this analysis.



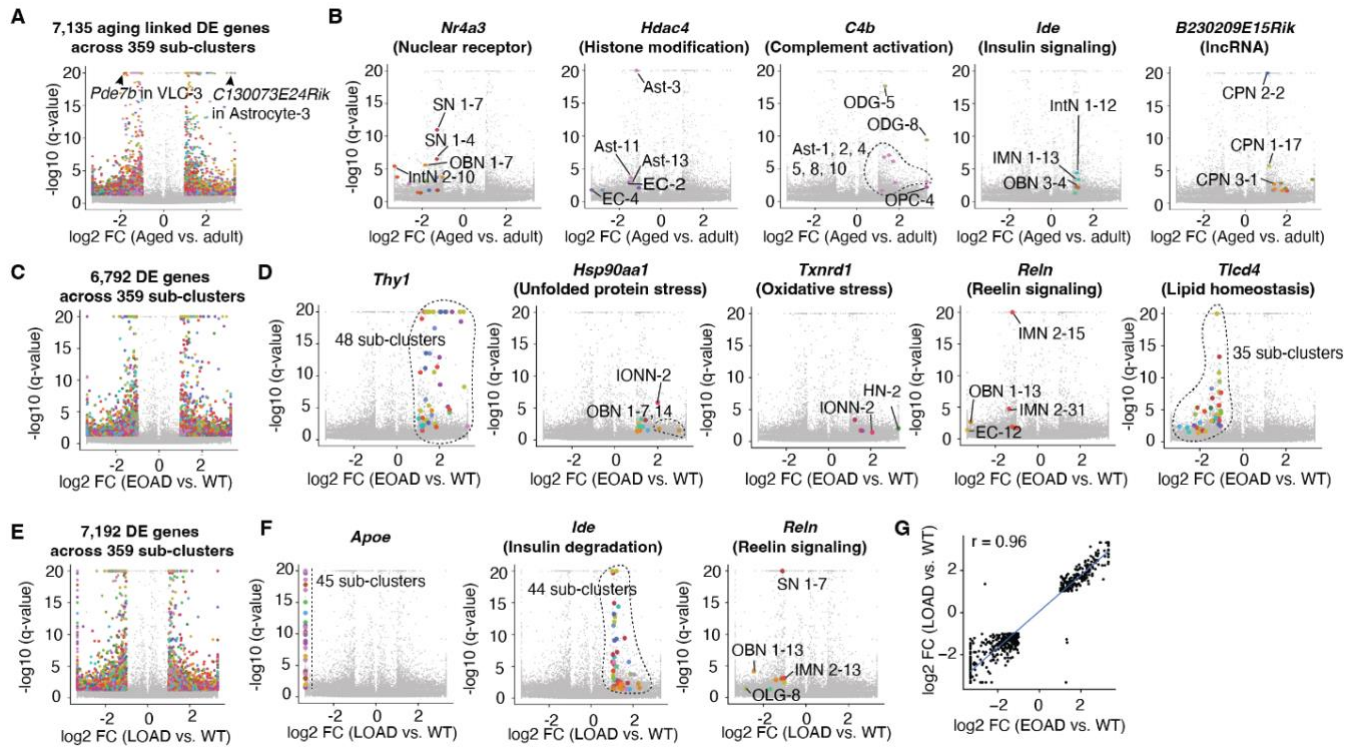

880

881

**Figure S13. Identifying aging and AD pathogenesis-associated gene expression signatures.**

882

(A) Volcano plots showing the differentially expressed (DE) genes between adult (6 months) and aged (21 months) mice across all sub-clusters. Significantly changed genes are colored by the main cell type identity for the corresponding sub-cluster.

883

884

(B) Volcano plot same as (A), highlighting example DE genes with concordant changes across multiple sub-clusters comparing adult and aged models, labeled with related biological pathways.

885

886

(C) Volcano plots showing the differentially expressed (DE) genes between WT and EOAD models across all sub-clusters. Significantly changed genes are colored by the main cell type identity for the corresponding sub-cluster.

887

888

889

(D) Volcano plot same as (C), highlighting example DE genes with concordant changes across multiple sub-clusters comparing WT and EOAD models, labeled with related biological pathways.

890

891

(E) Volcano plots showing the differentially expressed (DE) genes between WT and LOAD models across all sub-clusters. Significantly changed genes are colored by the main cell type identity for the corresponding sub-cluster.

892

893

894

(F) Volcano plot same as (E), highlighting example DE genes with concordant changes across multiple sub-clusters comparing WT and LOAD models, labeled with related biological pathways.

895

896

(G) We detected 559 DE genes significantly changed within the same sub-cluster in both AD models (both compared with the wild-type). The scatter plot shows the correlation of the log<sub>2</sub>-transformed fold changes of these 559 shared DE genes in the EOAD model (x-axis) and the LOAD model (y-axis).

897

898

899

900

901

902

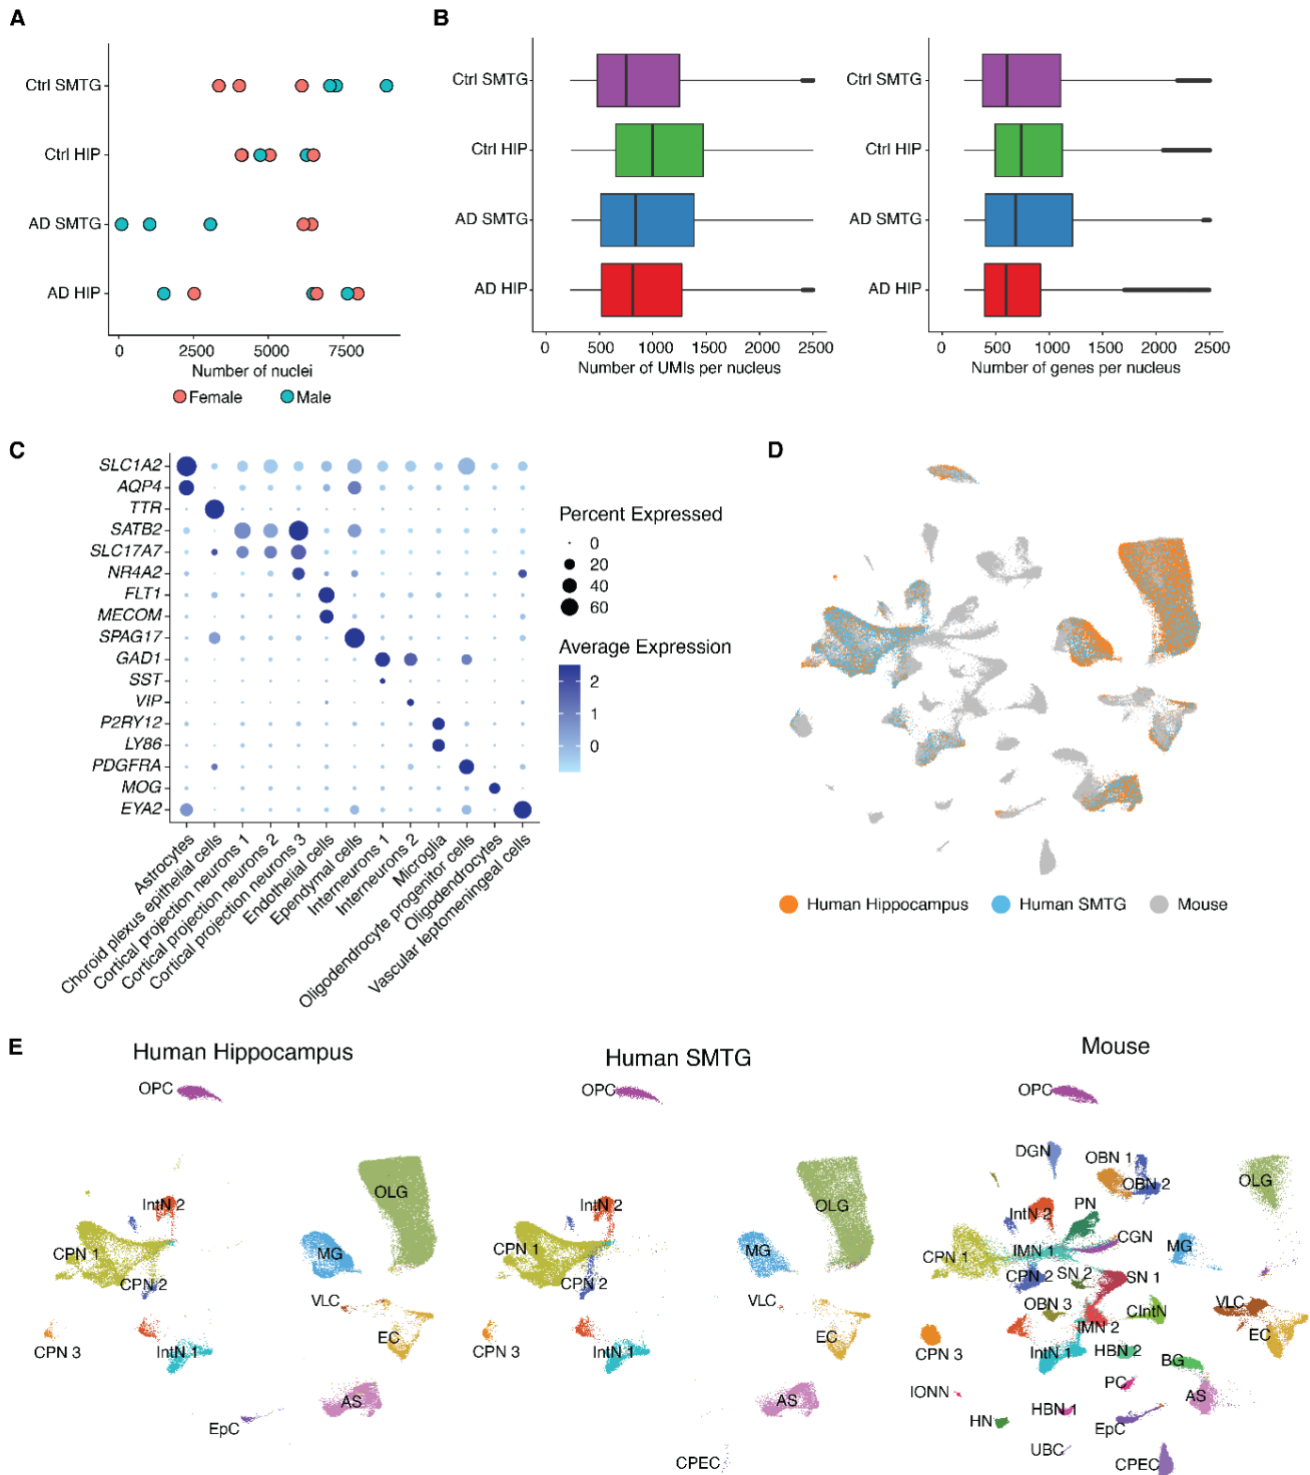

903

904

**Figure S14. Performance and quality control of the human brain dataset.**

905

(A) Scatter plot showing the number of single-cell transcriptomes profiled in each human sample in two regions, colored by sexes. Of note, the number of cells recovered from two AD individuals in the SMTG are very close and cannot be separated in the plot.

906

907

908

909 (B) Box plots showing the number of unique transcripts (left) and genes (right) detected per nucleus profiled  
910 in the human dataset. For all box plots: middle lines, medians; upper and lower box edges, first and third  
911 quartiles, respectively; whiskers, 1.5 times the interquartile range; and circles are outliers.  
912 (C) Dotplot showing the markers for the main cell types identified in the human dataset.  
913 (D-E) UMAP plot showing the integration between human and mouse cells, colored by the dataset (D) and  
914 main cell types (E). AS, astrocytes; BG, Bergmann glia; CGN, cerebellum granule neurons; CIntN,  
915 cerebellum interneurons; CPEC, choroid plexus epithelial cells; CPN 1, cortical projection neurons 1; CPN  
916 2, cortical projection neurons 2; CPN 3, cortical projection neurons 3; DGN, dentate gyrus neurons; EC,  
917 endothelial cells; EpC, ependymal cells; HN, habenula neurons; HBN 1, hindbrain neurons 1; HBN 2,  
918 hindbrain neurons 2; IONN, Inferior olivary nucleus neurons; IMN 1, interbrain and midbrain neurons 1;  
919 IMN 2, interbrain and midbrain neurons 2; IntN1, interneurons 1; IntN2, interneurons 2; MG, microglia;  
920 OBN 1, OB neurons 1; OBN 2, OB neurons 2; OBN 3, OB neurons 3; OPC, oligodendrocyte progenitor  
921 cells; OLG, oligodendrocytes; PC, pituitary cells; PN, purkinje cells; SN 1, striatal neurons 1; SN 2, striatal  
922 neurons 2; UBC, unipolar brush cells; VLC, vascular leptomenigeal cells.  
923  
924

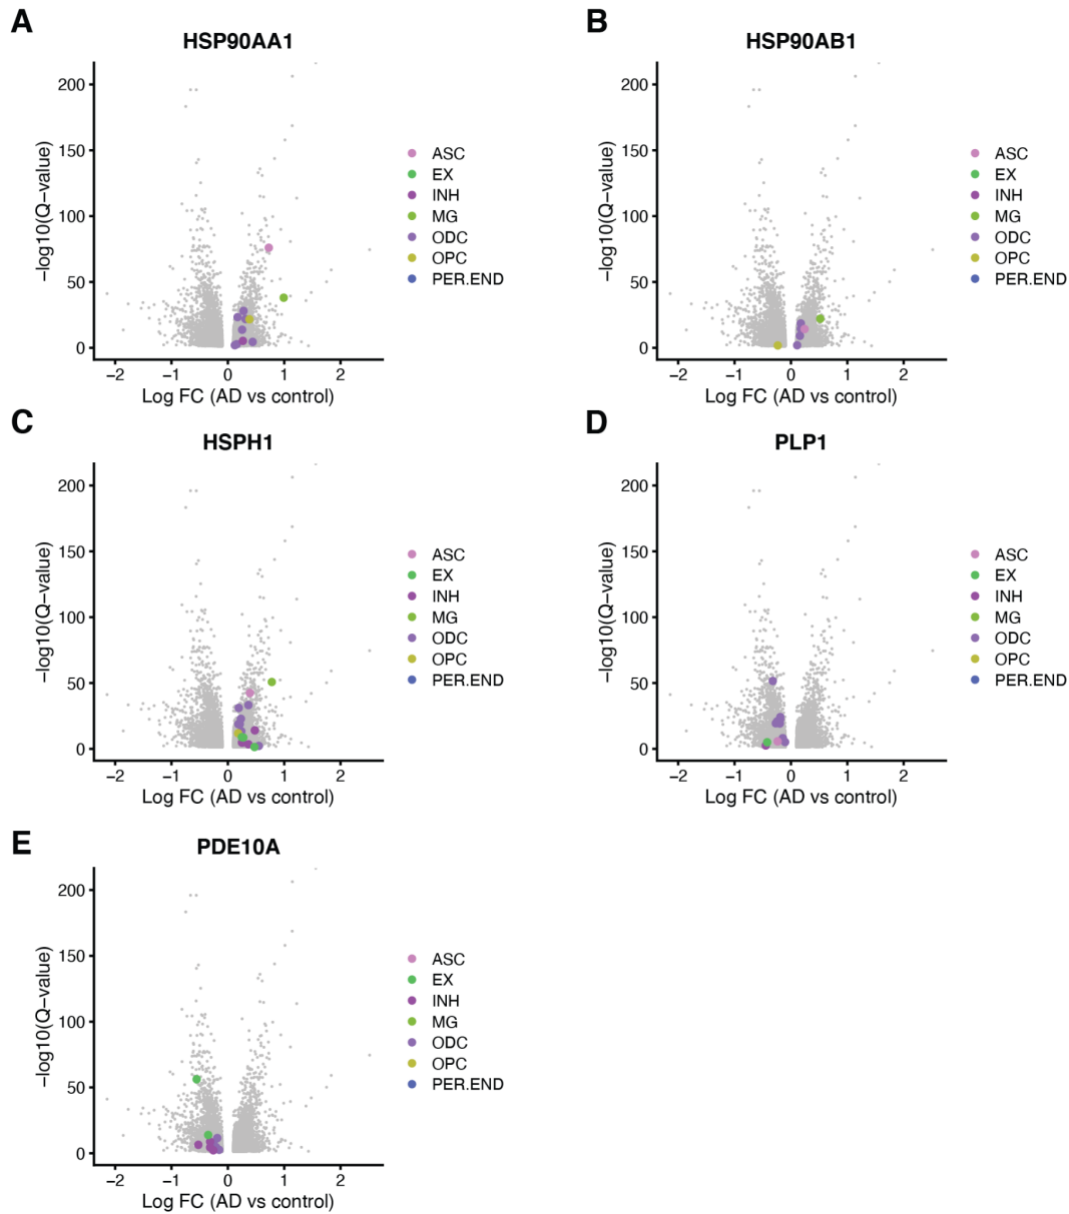

925  
926

927 **Figure S15. Identifying conserved gene expression changes across mouse AD models and human**  
928 **AD samples from the prefrontal cortex.** (A-E) Volcano plots of genes from human prefrontal cortex  
929 samples (Morabito et al., 2021). These genes show consistent changes in multiple cell subclusters  
930 between mouse AD models, human hippocampus and SMTG samples, and human prefrontal cortex  
931 samples from the above-mentioned publication. Dots on the figures represent genes across cell  
932 subclusters; abbreviations correspond to the following cell types: ASC, astrocytes; EX, excitatory neurons;  
933 INH, inhibitory neurons; MG, microglia; ODC, oligodendrocytes; OPC, oligodendrocyte progenitor cells;  
934 and PER.END, pericyte/endothelial cells.

935

## 936 **Materials and Methods:**

937

### 938 **Animals**

939

940 C57BL/6 wild-type mouse brains at three months (n=4), six months (n=4), and twenty-one months (n=4)  
941 were collected in this study. These age points correspond to approximately 20, 30, and 62 years in humans.  
942 Furthermore, to gain insight into the early cellular state changes underlying the pathophysiology of  
943 Alzheimer's disease, we added two AD models at 3-month-old from the same C57BL/6 background. These  
944 include an early-onset AD model (5xFAD, JAX stock #034840) that overexpresses mutant human amyloid-  
945 beta precursor protein (APP) with the Swedish (K670N, M671L), Florida (I716V), and London (V717I)  
946 Familial Alzheimer's Disease (FAD) mutations and human presenilin 1 (PS1) harboring two FAD mutations,  
947 M146L and L286V. Brain-specific overexpression is achieved by neural-specific elements of the mouse  
948 *Thy1* promoter (Oakley et al., 2006). The second, late-onset AD model (APOE\*4/Trem2\*R47H, JAX stock  
949 #028709) in this study carries two of the highest risk factor mutations of LOAD (Karch and Goate, 2015),  
950 including a humanized *APOE* knock-in allele, where exons 2, 3, and most of exon 4 of the mouse gene  
951 were replaced by the human ortholog including exons 2, 3, 4 and some part of the 3' UTR. Furthermore, a  
952 knock-in missense point mutation in the mouse *Trem2* gene was also introduced, consisting of an R47H  
953 mutation, along with two other silent mutations. Two male and two female mice are included in each  
954 condition.

955

956 By studying 3-month-old animals, our goal was to gain insight into the early changes underlying the  
957 pathophysiology of the AD models. Mature adult mice start at the age of 3 months, but multiple AD  
958 hallmarks, including amyloid-beta plaques and gliosis, can be observed in the early-onset 5xFAD model  
959 (Oakley et al., 2006). Therefore, we decided that this age might be the most appropriate for our goal to  
960 study early contributors of Alzheimer's disease pathomechanism.

961

### 962 ***EasySci-RNA* library preparation and sequencing**

963

964 Extracted mouse brains were snap-frozen in liquid nitrogen and stored at -80°C. Detailed step-by-step  
965 *EasySci-RNA* protocol is included as a supplementary file (**Supplementary file 1**).

966

### 967 **Human brain sample**

968

969 Twenty-four post-mortem human brain samples across two regions (hippocampus and superior and middle  
970 temporal gyrus) and twelve individuals, including six controls and six Alzheimer's disease patients ranging  
971 from 70 to 94 in age, were collected from the University of Kentucky Alzheimer's Disease Center Tissue  
972 Bank. Each surveyed sample underwent rigorous quality control, including short PMI, and was subjected  
973 to *EasySci-RNA* profiling. The libraries were sequenced across four Illumina NextSeq™ 1000 sequencer  
974 runs.

975

### 976 **Computational procedures for processing *EasySci-RNA* libraries**

977

978 A custom computational pipeline was developed to process the raw fastq files from the *EasySci* libraries.  
979 Similar to our previous studies (Cao et al., 2019, 2020), the barcodes of each read pair were extracted.  
980 Both adaptor and barcode sequences were trimmed from the reads. Second, an extra trimming step is



981 implemented using Trim Galore (Krueger et al., 2021) with default settings to remove the poly(A)  
982 sequences and the low-quality base calls from the cDNA. Afterward, the paired-end sequences were  
983 aligned to the genome with the STAR aligner (Dobin et al., 2013), and the PCR duplicates were removed  
984 based on the UMI sequence and the alignment location. Finally, the reads are split into SAM files per cell,  
985 and the gene expression is counted using a custom script. At this level, the reads from the same cell  
986 originating from the short dT and the random hexamer RT primers were counted as independent cells.  
987 During the gene counting step, we assigned reads to genes if the aligned coordinates overlapped with the  
988 gene locations on the genome. If a read was ambiguous between genes and derived from the short dT RT  
989 primer, we assigned the read to the gene with the closest 3' end; otherwise, the reads were labeled as  
990 ambiguous and not counted. If no gene was found during this step, we then searched for candidate genes  
991 1000 bp upstream of the read or genes on the opposite strand. Reads without any overlapped genes were  
992 discarded.

993  
994 We used a similar strategy to generate an exon count matrix across cells. Specifically, we counted the  
995 number of expressed exons based on the number of reads overlapping each exon. If one read overlapped  
996 with multiple exons, this read was split between the exons. Read overlapped with multiple genes were  
997 discarded, except if we can determine the exact gene based on the other paired-end read. For reads  
998 without overlapped genes, we checked if there are any overlapped exons on the opposite strand. Reads  
999 without any overlapped exons were discarded.

1000  
1001 To compare the performance of *EasySci-RNA* with the commercial 10x Chromium system on mouse brain  
1002 samples, we subsampled ~4,450 (from one randomly selected PCR batch of our large-scale mouse brain  
1003 experiment and from the following 10x Chromium dataset (Ding et al., 2020)) or ~20,000 (from a separate  
1004 deep-sequenced dataset we generated and the previously mentioned publicly available 10x Chromium  
1005 dataset) raw reads/cells to account for the different sequencing depths. The experiment, with the deeply  
1006 sequenced *EasySci* dataset (~20,000 reads/cells), contained cells from human and mouse cell lines as  
1007 well. Because these cell lines are known to have higher recovered signals per cell, we pre-selected the  
1008 cell barcodes corresponding to brain samples from the raw data before subsampling. This pre-selection of  
1009 expected barcodes removes sequences with non-matching barcodes in the target location of the reads,  
1010 like primer dimers. To adjust for the enrichment of the signal of interest, we performed the same barcode  
1011 pre-selection on the 10x Chromium data. After the subsampling, the *EasySci* data was processed with the  
1012 custom computational pipeline, while the 10x Chromium data was processed with 10x Genomics' Cell  
1013 Ranger software (Zheng et al., 2017).

### 1014 1015 **Cell clustering and cell type annotation of single-cell RNA-seq data**

1016  
1017 After gene counting, we kept the cells with reads identified by both RT primers. We then merged the reads  
1018 from the same cells. Low-quality cells were removed based on one of the following criteria: (i) the  
1019 percentage of unassigned reads > 30%, (ii) the number of UMIs > 20,000, and (iii) the detected number of  
1020 genes < 200. We then used the Scrublet (Wolock et al., 2019) computational pipeline to identify and  
1021 remove potential doublets, similar to our previous study (Cao et al., 2020). At the end of these filtering  
1022 steps, we had around 1.5 million brain cells in the dataset.

1023  
1024 To identify distinct clusters of cells corresponding to different cell types, we subjected the 1,469,111 single-  
1025 cell gene expression profiles to UMAP visualization and Louvain clustering, similar to our previous study

1026 (Cao et al., 2020). We then co-embedded our data with the published datasets (Kozareva et al., 2021; Yao  
1027 et al., 2021; Zeisel et al., 2018) through Seurat (Stuart et al., 2019), and clusters were annotated based  
1028 on overlapped cell types. The annotations were manually verified and refined based on marker genes.  
1029 Differentially expressed genes across cell types were identified with the differentialGeneTest() function of  
1030 Monocle 2 (Qiu et al., 2017). To identify cell type-specific gene markers, we selected genes that were  
1031 differentially expressed across different cell types (FDR of 5%, likelihood) and also with a > 2-fold  
1032 expression difference between first and second-ranked cell types and TPM > 50 in the first-ranked cell  
1033 types.

### 1034 **Isoform expression analysis**

1035  
1036 Isoform expression was quantified in *EasySci* data using an adapted version of the pipeline built by  
1037 Booeshaghi et al. (Booeshaghi et al., 2021) RandomN-primed reads for ~1.5M single cells were merged  
1038 into 613 pseudocells, grouping by individual mouse and cell types (31 cell types). The pseudocells were  
1039 aligned to the mouse transcriptome with *kallisto* (Melsted et al., 2021), generating a raw isoform count  
1040 matrix. To filter and pre-process the raw data, isoform counts were normalized by length, and genes and  
1041 isoforms with a dispersion of less than 0.001 were removed. The gene count matrix was produced by  
1042 aggregating counts of all isoforms of a given gene. Both isoform and gene count matrices were normalized  
1043 by dividing the counts in each cell by the sum of the counts for that cell, then multiplying by 1,000,000 and  
1044 transforming with numpy's log<sub>1p</sub>() function. The filtered data contained 33,361 isoforms corresponding to  
1045 12,636 genes. Highly variable isoforms and genes were identified using scanpy, by binning into 20 bins  
1046 and scaling the dispersion for each feature to zero mean and unit variance within each bin. The top 5,000  
1047 gene and isoforms in each matrix were retained based on normalized dispersion. Neighborhood  
1048 components analysis was performed on the filtered and normalized isoform matrix after scaling the  
1049 log(1+TPM) expression to zero mean and unit variance, training on cell type labels from each pseudocell  
1050 with random state 42, and visualized using t-SNE with perplexity 10, 5,000 iterations and random state 42.  
1051 Differentially expressed isoforms were identified by looking for isoforms that were upregulated across a  
1052 given cell type, while the genes containing those isoforms were not significantly expressed more among  
1053 that cell type than its complement (the rest of the dataset). Isoforms expressed in less than 90% of  
1054 pseudocells within a cell type were discarded. T-tests used a significance level of 0.01 with Bonferroni  
1055 correction for multiple comparisons.  
1056

### 1057 **Sub-cluster analysis of the single-cell RNA-seq data**

1058  
1059 To identify cell subtypes, we selected each main cell type and applied PCA, UMAP and Louvain clustering  
1060 similarly to the major cluster analysis, based on a combined matrix including the 30 principal components  
1061 derived from the gene-level expression matrix and the first 10 principal components derived from the exon-  
1062 level expression matrix. We then merged sub-clusters that were not readily distinguishable in the UMAP  
1063 space through an intra-dataset cross-validation procedure described before (Cao et al., 2020). A total of  
1064 359 cell subtypes were identified, with a median of 1,038 cells in each group. All subtypes were contributed  
1065 by at least two individuals (median of twenty). Differentially expressed genes and exons across cell types  
1066 were identified with the differentialGeneTest() function of Monocle 2 (Qiu et al., 2017). To identify sub-  
1067 cluster-specific differentially expressed genes associated with aging or AD models, we sampled a  
1068 maximum of 5,000 cells per condition for downstream DE gene analysis using the differentialGeneTest  
1069

1070 function of the Monocle 2 package (Qiu et al., 2017). The sex of the animals was included as a covariate  
1071 to reduce gender-specific batch effects.

1072  
1073 To detect cellular fraction changes at the subtype level across various conditions, we first generated a cell  
1074 count matrix by computing the number of cells from every sub-cluster in each reverse transcription well  
1075 profiled by *EasySci-RNA*. Each RT well was regarded as a replicate comprising cells from a specific  
1076 mouse individual. We then applied the likelihood-ratio test to identify significantly changed sub-clusters  
1077 between different conditions, with the differentialGeneTest() function of Monocle 2 (Qiu et al., 2017). Sub-  
1078 clusters were removed if they had less than 20 cells in either the male or female samples. The fold change  
1079 was calculated manually by first normalizing the number of cells in a cluster by the total number of cells in  
1080 the corresponding condition, then dividing the normalized values in the case and control conditions after  
1081 adding a small number ( $10^{-5}$ ) to reduce the effect of the very small clusters. In addition, we considered  
1082 subclusters to change significantly only if there was at least a two-fold change between two groups and  
1083 the q-value was less than 0.05.

### 1084 **Spatial transcriptomic analysis to estimate spatial abundances of cell subtypes**

1085  
1086 To spatially map *EasySci* cell subtypes, we integrated the *EasySci-RNA* data with a publicly available 10x  
1087 Visium spatial transcriptomics dataset (Genomics, 2019a, 2019b, 2019c) using cell2location, a Bayesian  
1088 model designed to map fine-grained cell types. We first aggregated ~50 single-cell transcriptomes  
1089 identified by k-means clustering ( $k = 50$ ) of cells in the UMAP space of sub-clustering analysis. The  
1090 cell2location model first used negative binomial regression to estimate reference cell type signatures from  
1091 the *EasySci-RNA* data. In a second step, cell2location decomposed spatial mRNA counts from 10x Visium  
1092 data into the reference signatures to estimate cell type spatial abundances. Training of the model utilized  
1093 durations of 25 and 15,000 epochs for the negative binomial regression and spatial mapping steps,  
1094 respectively.

### 1095 **Gene module analysis**

1096  
1097 We performed gene module analysis to identify the molecular programs underlying different cell types in  
1098 the brain. First, we aggregated the gene expression across all sub-clusters. The aggregated gene count  
1099 matrix was then normalized by the library size and then log-transformed ( $\log_{10}(\text{TPM} / 10 + 1)$ ). Genes  
1100 were removed if they exhibited low expression (less than 1 in all sub-clusters) or low variance of expression  
1101 (*i.e.*, the gene expression fold change between the maximum expressed sub-cluster and the median  
1102 expression across sub-clusters is less than 5). The filtered matrix was used as input for UMAP/0.3.2  
1103 visualization (McInnes et al., 2018) (metric = "cosine", min\_dist = 0.01, n\_neighbors = 30). We then  
1104 clustered genes based on their 2D UMAP coordinates through densityClust package ( $\rho = 1$ ,  $\delta = 1$ )  
1105 (Rodriguez and Laio, 2014).

### 1106 ***EasySci*-ATAC library preparation and sequencing**

1107  
1108 Mouse brain samples were snap-frozen in liquid nitrogen and stored at  $-80^{\circ}\text{C}$ . For nuclei extraction, thawed  
1109 brain samples were minced in PBS using a blade, re-frozen, stored at  $-80^{\circ}\text{C}$ , and processed in multiple  
1110 batches. The detailed step-by-step protocol is included as a supplementary file (**Supplementary file 4**).

## 1115 **Data processing for *EasySci-ATAC***

1116

1117 Base calls were converted to fastq format and demultiplexed using Illumina's bcl2fastq/v2.19.0.316  
1118 tolerating one mismatched base in barcodes (edit distance (ED) < 2). Downstream sequence processing  
1119 was similar to sci-ATAC-seq (Cao et al., 2018). Indexed Tn5 barcodes and ligation barcodes were  
1120 extracted, corrected to its nearest barcode (edit distance (ED) < 2) and reads with uncorrected barcodes  
1121 (ED >= 2) were removed. Tn5 adaptors were removed from 5'-end and clipped from 3'-end using  
1122 trim\_galore/0.4.1 (Krueger et al., 2021). Trimmed reads were mapped to the mouse genome (mm39) using  
1123 STAR/v2.5.2b (Dobin et al., 2013) with default settings. Aligned reads were filtered using samtools/v1.4.1  
1124 (Li et al., 2009) to retain reads mapped in proper pairs with quality score MAPQ > 30 and to keep only the  
1125 primary alignment. Duplicates were removed by picard MarkDuplicates/v2.25.2 (Broad Institute, 2019) per  
1126 PCR sample. Deduplicated bam files were converted to bedpe format using bedtools/v2.30.0 (Quinlan and  
1127 Hall, 2010), which were further converted to offset-adjusted (+4 bp for plus strand and -5 bp for minus)  
1128 fragment files (.bed). Deduplicated reads were further split into constituent cellular indices by further  
1129 demultiplexing reads using the Tn5 and ligation indexes. For each cell, we also created sparse matrices  
1130 counting reads falling into promoter regions ( $\pm 1$  kb around TSS) for downstream analysis.

1131

## 1132 **Cell filtering, clustering and annotation for *EasySci-ATAC***

1133 We used SnapATAC2/v1.99.99.3(Fang et al., 2021; Zhang, 2022) to perform preprocessing steps for the  
1134 *EasySci-ATAC* dataset. Cells with less than 1500 fragments and less than 2 TSS Enrichment were  
1135 discarded. Potential doublet cells and doublet-derived subclusters were detected using an iterative  
1136 clustering strategy (Cao et al., 2020) modified to suit for scATAC-seq data. Briefly, cells were splitted by  
1137 individual animals to overcome the large memory use when simulating doublets for the full dataset, and  
1138 doublet scores were calculated using snap.pp.scrublet() (Wolock et al., 2019). Then, all cells were  
1139 combined, followed by clustering and sub-clustering analysis with spectral embedding and graph-based  
1140 clustering implemented in SnapATAC2. Cells labeled as doublets (defined by a doublet score cutoff of 0.2)  
1141 or from doublet-derived sub-clusters (defined by a doublet ratio cutoff of 0.4) were filtered out. In addition,  
1142 cells with high fragment numbers in each main cluster (defined as cells with fragments number higher than  
1143 the 95th quantile within the main cluster) were also filtered out. We then generated a gene activity matrix  
1144 using snap.pp.make\_gene\_matrix() for the following integration analysis.

1145

1146 We used a deep-learning-based framework scJoint (Lin et al., 2022) to annotate main ATAC-seq cell types  
1147 using the *EasySci-RNA* dataset as a reference. First, we subsampled 5,000 cells from each main cell type  
1148 of the *EasySci-RNA* dataset, and selected genes detected in more than 10 cells. Then, the gene count  
1149 matrix and cell type labels of *EasySci-RNA*, along with the gene activity matrix of *EasySci-ATAC* were  
1150 input into the scJoint pipeline with default parameters. Jointed embedding layers calculated from scJoint  
1151 were used for UMAP visualizations using python package umap/v0.5.3 (McInnes, 2018). Louvain clusters  
1152 were identified using the Seurat function FindNeighbors() and FindClusters() based on the UMAP  
1153 coordinates. Cells were assigned to the prediction label with the highest abundance within each louvain  
1154 cluster. Clusters with low purities (*i.e.*, less than 80% cells were from the highest abundant cell type) were  
1155 removed upon inspections. Finally, to validate the integration-based annotations, we selected differentially  
1156 expressed genes identified from the RNA-seq data with the following criteria: fold change between the  
1157 maximum and the second maximum expressed cell type > 1.5, q-value < 0.05, TPM (transcripts per million)  
1158 > 20 in the maximum RNA group and RPM (reads per million) > 50 in the maximum ATAC group. Top 10



1159 genes ranked by fold change between the maximum and the second maximum expressed group were  
1160 selected using RNA-seq data for each cell type. If there were less than 10 genes passing the cutoff, we  
1161 selected the top genes ranked by the fold change between the maximum expressed cell type and the mean  
1162 expression of other cell types. We then calculated the aggregated gene count and gene body accessibility  
1163 (gene activity) for each cell type.

1164  
1165 Subcluster level integrations were similar to the main cluster level integrations with mild modifications. For  
1166 astrocytes, microglia, OB neurons 1, OB neurons 2, OB neurons 3 and vascular leptomeningeal cells, we  
1167 used all cells from the *EasySci-RNA* dataset as input for the integrations. For oligodendrocytes, we  
1168 subsampled 2,000 cells from each subcluster from the *EasySci-RNA* data for integration analysis.  
1169 Similarly, we validated the subcluster level integrations by inspecting the aggregated gene activity of  
1170 subcluster-specific gene markers in the predicted ATAC subclusters. Subcluster marker genes were  
1171 identified by differential expression analysis using scRNA-seq data and selected by the following criteria:  
1172 fold change between the maximum expressed sub-cluster and the mean of all the other subclusters within  
1173 the same main cell type  $> 2$ , FDR  $< 0.05$ , TPM (transcripts per million)  $> 50$  in the maximum expressed  
1174 RNA group and RPM (reads per million)  $> 50$  in the maximum accessible ATAC group.

### 1175 1176 **Peak calling, peak-based dimension reduction and identifications of differential accessible peaks**

1177  
1178 To define peaks of accessibility, we used MACS2/v2.1.1 (Zhang et al., 2008). Nonduplicate ATAC-seq  
1179 reads of cells from each main cell type were aggregated and peaks were called on each group separately  
1180 with these parameters: `--nomodel --extsize 200 --shift -100 -q 0.05`. To correct for differences in read depth  
1181 or the number of nuclei per cell type, we converted MACS2 peak scores ( $-\log_{10}(\text{q-value})$ ) to 'score per  
1182 million' (Corces et al., 2018) and filtered peaks by choosing a score-per-million cut-off of 1.3. Peak summits  
1183 were extended by 250bp on either side and then merged with bedtools/v2.30.0. Cells were determined to  
1184 be accessible at a given peak if a read from a cell overlapped with the peak. The peak count matrix was  
1185 generated by a custom python script with the HTseq package (Anders et al., 2015).

1186  
1187 We used R package Signac/v1.7.0 (Stuart et al., 2021) to perform the dimension reduction analysis using  
1188 the peak-count matrix. We subsampled 5,000 cells from each main cell type and performed TF-IDF  
1189 normalization using `RunTFIDF()`, followed by singular value decomposition using `RunSVD()` and retained  
1190 the 2nd to 30th dimensions for UMAP visualizations using `RunUMAP()`.

1191  
1192 Differentially accessible peaks across cell types were identified using monocle 2 (Qiu et al., 2017) with the  
1193 `differentialGeneTest()` function. 5,000 cells were subsampled from each cell type for this analysis. Peaks  
1194 detected in less than 50 cells were filtered out. We selected peaks that were differentially accessible across  
1195 cell types by the following criteria: 5% FDR (likelihood ratio test), and with TPM  $> 20$  in the target cell type.

### 1196 1197 **Transcription factor motif analysis**

1198  
1199 We used ChromVar/v1.16.0 (Schep et al., 2017) to access the TF motif accessibility using a collection of  
1200 the cisBP motif sets curated by chromVARmotifs/v0.2.0 (Weirauch et al., 2014; Schep et al., 2017). To  
1201 investigate TF regulators at the main cluster level, we subsampled 5,000 cells from each main cell type,



1202 and calculated the motif deviation score for each single cell using the Signac wrapper RunChromVAR().  
1203 The motif deviation scores of each single cell were rescaled to (0, 10) using R function rescale() and then  
1204 aggregated for each cell type. In addition, we also aggregated the gene expression of each TF in each cell  
1205 type. We then computed the Pearson correlations between the aggregated motif matrix and aggregated  
1206 TF expression matrix after scaling across all main cell types. TF analysis at the subcluster level was  
1207 performed similarly with modifications. For each cell type of interest, we selected peaks detected in more  
1208 than 20 cells and only kept cells with more than 500 reads in peaks. Peaks were resized to 500 bp ( $\pm$  250  
1209 bp around the center) and motif occurrences were identified using matchMotifs() function from  
1210 motifmatchr/v1.16.0 (Schep, 2017). The motif deviation matrix was calculated using the ChromVar function  
1211 computeDeviations(). Then, the motif deviation scores were rescaled to (0, 10) and aggregated per  
1212 subcluster. Pearson correlation was calculated between the aggregated motif activity and aggregated TF  
1213 expression across subclusters after scaling. ATAC-seq subclusters with less than 20 cells were excluded  
1214 from the correlation analysis.

### 1215 1216 **Spatial gene expression profiling of mouse brains**

1217  
1218 Spatial gene expression analysis experimental protocol was followed according to Visium Spatial Gene  
1219 Expression User Guide (catalog no. CG000160), Visium Spatial Tissue Optimization User Guide (catalog  
1220 no. CG000238 Rev A, 10x Genomics) and Visium Spatial Gene Expression User Guide (catalog no.  
1221 CG000239 Rev A, 10x Genomics). Briefly, mice were sacrificed, and brains were extracted and frozen with  
1222 liquid nitrogen. Frozen brain was embedded in OCT (Tissue TEK O.C.T compound) and cryosectioned at  
1223  $-15^{\circ}\text{C}$  (Leica cryostat). Coronally placed brains were cut halfway, to place half coronally sectioned brains  
1224 at 10 $\mu\text{m}$  on Visium tissue optimization, or gene expression analysis slides capture areas. User guide  
1225 CG000160 from 10x Genomics was followed for methanol fixation and H&E stain. After fixation and  
1226 staining, imaging was performed using Leica DMI8, and images were stitched using Leica Application Suite  
1227 X and saved into .tiff format. After tissue fixation and staining, Visium Spatial Tissue Optimization User  
1228 Guide (catalog no. CG000238 Rev A, 10x Genomics) or Visium Spatial Gene Expression User Guide  
1229 (catalog no. CG000239 Rev A, 10x Genomics) were followed for either protocol optimization, or gene  
1230 expression analysis, respectively. Tissue optimization was performed according to CG000238, and  
1231 according to optimization experiments, 18 min permeabilization provided the most optimal signal, and was  
1232 followed for gene expression library preparation as well. Libraries were prepared according to Visium  
1233 Spatial Gene Expression User Guide (CG000239, 10x Genomics)

### 1234 1235 **Library preparation and data processing of spatial transcriptomics**

1236  
1237 Libraries were sequenced using a NextSeq1000 system. BCL files were converted to FASTQ, and raw  
1238 FASTQ files and .tiff histology images were processed with spaceranger-1.2.2 software. Spaceranger-  
1239 1.2.2 uses STAR for RNA reads genome alignment, and utilized the GRCm38 (mouse mm10) as the  
1240 reference genome provided from 10X Genomics. We performed the downstream visualization and  
1241 clustering analysis of the spatial transcriptomic data following the tutorial of Seurat (Stuart et al., 2019)  
1242 ([https://satijalab.org/seurat/articles/spatial\\_vignette.html](https://satijalab.org/seurat/articles/spatial_vignette.html)) with default parameters.

### 1244 **Spatial transcriptomic analysis to locate the spatial distributions of main cell types and subtypes**

1246 To annotate the spatial locations of main cell types, we integrated the *EasySci-RNA* data with publicly  
1247 available 10x Visium spatial transcriptomics dataset (  
1248 [https://satijalab.org/seurat/articles/spatial\\_vignette.html](https://satijalab.org/seurat/articles/spatial_vignette.html)) (Genomics, 2019a, 2019b, 2019c) through a non-  
1249 negative least squares (NNLS) approach modified from our previous study (Cao et al., 2020). We first  
1250 aggregated cell-type-specific UMI counts, normalized by the library size, multiplied by 100,000, and log-  
1251 transformed after adding a pseudo-count. A similar procedure was applied to calculate the normalized  
1252 gene expression in each spatial spot captured in the 10x Visium dataset. We then applied non-negative  
1253 least squares (NNLS) regression to predict the gene expression of each spatial spot in 10x Visium data  
1254 using the gene expression of all cell types recovered in Easy-RNA data:

$$1255 \\ 1256 T_a = \beta_{0a} + \beta_{1a}M_b$$

1257  
1258 where  $T_a$  and  $M_b$  represent filtered gene expression for target spatial spot from 10x Visium dataset A and  
1259 all cell types from *EasySci-RNA* dataset B, respectively. To improve accuracy and specificity, we selected  
1260 cell type-specific genes for each target cell type by: 1) ranking genes based on the expression fold-change  
1261 between the target cell type vs. the median expression across all cell types, and then selecting the top 200  
1262 genes. 2) ranking genes based on the expression fold-change between the target cell type vs. the cell type  
1263 with maximum expression among all other cell types, and then selecting the top 200 genes. 3) merging  
1264 the gene lists from step (1) and (2).  $\beta_{1a}$  is the correlation coefficient computed by NNLS regression.

1265  
1266 Similarly, we then switch the order of datasets A and B, and predict the gene expression of target cell type  
1267 ( $T_b$ ) in dataset B with the gene expression of all spatial spots ( $M_a$ ) in dataset A:

$$1268 \\ 1269 T_b = \beta_{0b} + \beta_{1b}M_a$$

1270  
1271 Thus, each spatial spot a in 10x Visium dataset A and each cell type b in *EasySci* dataset B are linked by  
1272 two correlation coefficients from the above analysis:  $\beta_{ab}$  for predicting the gene expression in each spatial  
1273 spot a using b, and  $\beta_{ba}$  for predicting gene expression in each cell type b using a. We combine the two  
1274 values by:

$$1275 \\ 1276 \beta = (\beta_{ab} + 0.01) * (\beta_{ba} + 0.01)$$

1277  
1278 The  $\beta$  is then capped to [1, 3]. We find  $\beta$  reflects the cell-type-specific abundance across different spatial  
1279 spots in 10x Visium datasets with high specificity. We thus use  $\beta$  as the alpha value (*i.e.*, the opacity of a  
1280 geom) to plot the spatial distribution of different cell types.

1281  
1282 To characterize the expression of sub-cluster specific gene markers, we first normalized the gene  
1283 expression in each spatial spot of 10x Visium data by the library size, multiplied by 100,000, and log-  
1284 transformed after adding a pseudo-count. The expression of genes from sub-cluster specific gene markers  
1285 was aggregated, scaled to z-score and capped to [3, 6]. Of note, the sub-cluster specific gene markers  
1286 were selected by differentiation expression analysis described above and only DE genes (FDR of 5%, with  
1287 a >2-fold expression difference between first and second ranked sub-clusters, expression TPM > 50 in at  
1288 least one sub-cluster) were selected as gene markers. In addition, we examined the aggregated

1289 expression of the selected gene markers across all 359 sub-clusters to further validate the specificity of  
1290 gene markers for labeling target sub-clusters.

1291

## 1292 **Clustering, annotation and differential analysis for human brain samples**

1293 A digital gene expression matrix was constructed from the raw sequencing data as described before. To  
1294 identify distinct clusters of cells corresponding to different cell types in the human brain samples, we co-  
1295 embedded the human cells from both regions with our mouse brain dataset (up to 5,000 cells randomly  
1296 sampled from each of 31 cell types), and clusters were annotated based on overlapped cell types. The  
1297 annotations were manually verified and refined based on marker genes. Following on, the hippocampus  
1298 and SMTG human dataset were integrated together to construct the same low-dimensional space with  
1299 only human cells.

1300

1301 Differentially expressed genes between AD and control samples for each cell type in each region were  
1302 identified using Monocle 2 (Qiu et al., 2017) with the differentialGeneTest() function. Main cell types with  
1303 less than 50 cells were excluded from the analysis (i.e, choroid plexus epithelial cells and vascular  
1304 leptomeningeal cells in the SMTG). DE genes were filtered based on the following cutoffs: q-value < 0.05,  
1305 with FC > 1.5 between the maximum and second expressed condition, and with transcripts per million  
1306 (TPM) > 50 in the highest expressed condition. To further validate human-mouse shared gene expression  
1307 changes, we used a recently published Alzheimer's disease single-cell dataset from the human prefrontal  
1308 cortex (Morabito et al., 2021).

1309

## 1310 **Code Availability**

1311 The detailed experimental protocol and computation scripts of *EasySci* were included as supplementary  
1312 files.

1313

## 1314 **Supplementary Tables (provided as Microsoft Excel files)**

1315 **Supplementary Table 1:** Differentially expressed genes across main cell types. For each gene, the “Cell  
1316 type” is the cell type with the highest expression, with the expression level quantified by transcripts per  
1317 million in “TPM in cell type”. The “Q-value” is the false detection rate (one-sided likelihood ratio test with  
1318 adjustment for multiple comparisons) for the differential expression test across different cell clusters. The  
1319 “Fold change” is the fold change between the max expressed cell type and the second expressed cell type.

1320 **Supplementary Table 2:** Differentially expressed isoforms across main cell types. For each isoform  
1321 (“Isoform”), the “Cell type” is the cell type with the highest expression. The “P-value” is the raw p-value for  
1322 the differential expression test across different cell types; and the “Q-value” is the false detection rate (one-  
1323 sided likelihood ratio test with adjustment for multiple comparisons). The “Effect size” is the effect size  
1324 between the max expressed cell type and the second expressed cell type.

1325 **Supplementary Table 3:** Differentially accessible sites for main cell types. For each peak (“Peak”), the  
1326 “Max cell type” is the cell type with the highest accessibility (“Peak accessibility in max cell type”). The  
1327 “Second cell type” is the cell type with the second highest accessibility (“Peak accessibility in second cell  
1328 type”). The “Fold change” is the fold change between the max accessibility and the second max  
1329 accessibility. The “P-value” is the raw p-value for the differential accessibility test across different cell types,

1330 and the “Q-value” is the false detection rate (one-sided likelihood ratio test with adjustment for multiple  
1331 comparisons).

1332 **Supplementary Table 4:** Differentially expressed exons across sub-clusters within each main cell type.  
1333 For each sub-cluster (“Cell sub-cluster ID”), the following features of marker genes are listed: gene symbol  
1334 (“Gene name”); Ensembl ID of the gene and the exon (“Exon ID”); false detection rate (one-sided likelihood  
1335 ratio test with adjustment for multiple comparisons) for the differential expression test across different cell  
1336 sub-clusters within each main cell type (“Q-value”); fold change of the marker exon expression between  
1337 the max and second expressed cell sub-cluster (“Fold change”); expression level of the marker exon  
1338 quantified by transcripts per million in max sub-cluster (“TPM in max sub-cluster”). Marker exons are  
1339 defined by Q-value < 0.05, Fold change > 2 and TPM in max subcluster > 50.

1340 **Supplementary Table 5:** Gene module analysis results. For each gene module (“Gene module ID”), the  
1341 following information about the genes belonging to that gene module is listed: Ensembl ID (“Gene ID”);  
1342 type of gene (“Gene type”); gene symbol (“Gene name”); UMAP visualization coordinates of the genes  
1343 based on their expression variance across all 359 cell sub-clusters (“UMAP 1”, “UMAP 2”).

1344 **Supplementary Table 6:** Differentially abundant sub-clusters between adult and young samples. Sub-  
1345 clusters (“Cell sub-clusters”) abundances were compared between the 3 vs 6 months old groups  
1346 (“Condition”), and the following statistical values are listed: false detection rate (likelihood ratio test with  
1347 adjustment for multiple comparisons) for the differential abundance test across age groups (“Q-value”);  
1348 log<sub>2</sub> fold change of the cell sub-cluster abundance between the age groups (“Log<sub>2</sub>(Fold change)”); the  
1349 number of cells compared in the sub-cluster (“Number of cells”); whether the sub-cluster is upregulated,  
1350 downregulated or there is no significant change (“Final change”, significance was determined by Fold  
1351 change > 2, Q-value < 0.05 and more than 20 cells in both male and female samples).

1352 **Supplementary Table 7:** Differentially abundant sub-clusters between aged and adult samples. Sub-  
1353 clusters (“Cell sub-clusters”) abundances were compared between the 6 vs 21 months old groups  
1354 (“Condition”), and the following statistical values are listed: false detection rate (likelihood ratio test with  
1355 adjustment for multiple comparisons) for the differential abundance test across age groups (“Q-value”);  
1356 log<sub>2</sub> fold change of the cell sub-cluster abundance between the age groups (“Log<sub>2</sub>(Fold change)”); the  
1357 number of cells compared in the sub-cluster (“Number of cells”); whether the sub-cluster is upregulated,  
1358 downregulated or there is no significant change (“Final change”, significance was determined by Fold  
1359 change > 2, Q-value < 0.05 and more than 20 cells in both male and female samples).

1360 **Supplementary Table 8:** Differentially expressed genes between aged and adult for all sub-clusters. For  
1361 each subcluster in the dataset (“Cell subcluster”), the following information is listed: gene symbol (“Gene  
1362 name”); gene Ensembl ID (“Gene ID”); the false detection rate (one-sided likelihood ratio test with  
1363 adjustment for multiple comparisons) for the differential expression test across the age groups (“Q-value”);  
1364 fold change between the max expressed age group and second expressed age group (“Fold change”);  
1365 expression level quantified by transcripts per million in the max age group (“TPM in max condition”); the  
1366 age group where the max expression was detected (“Max condition”). Only significant genes are listed in  
1367 the table, which is defined by Q-value < 0.05, Fold change > 2 and TPM in max condition > 50.



1368 **Supplementary Table 9:** Differentially abundant sub-clusters between wild-type and EOAD model. Sub-  
1369 clusters (“Cell sub-clusters”) abundances were compared between the wild-type and EOAD model  
1370 (5xFAD) groups (“Condition”), and the following statistical values are listed: false detection rate (likelihood  
1371 ratio test with adjustment for multiple comparisons) for the differential abundance test between conditions  
1372 (“Q-value”); log<sub>2</sub> fold change of the cell sub-cluster abundance between conditions (“Log<sub>2</sub>(Fold change)”);  
1373 the number of cells compared in the sub-cluster (“Number of cells”); whether the sub-cluster is upregulated,  
1374 downregulated or there is no significant change (“Final change”, significance was determined by Fold  
1375 change > 2, Q-value < 0.05 and more than 20 cells in both male and female samples).

1376 **Supplementary Table 10:** Differentially abundant sub-clusters between wild-type and LOAD model. Sub-  
1377 clusters (“Cell sub-clusters”) abundances were compared between the wild-type and LOAD model  
1378 (APOE\*4/Trem2\*R47H) groups (“Condition”), and the following statistical values are listed: false detection  
1379 rate (likelihood ratio test with adjustment for multiple comparisons) for the differential abundance test  
1380 between conditions (“Q-value”); log<sub>2</sub> fold change of the cell sub-cluster abundance between conditions  
1381 (“Log<sub>2</sub>(Fold change)”); the number of cells compared in the sub-cluster (“Number of cells”); whether the  
1382 sub-cluster is upregulated, downregulated or there is no significant change (“Final change”, significance  
1383 was determined by Fold change > 2, Q-value < 0.05 and more than 20 cells in both male and female  
1384 samples).

1385 **Supplementary Table 11:** Differentially expressed genes between wild-type and EOAD model (5xFAD)  
1386 for all sub-clusters. For each subcluster in the dataset (“Cell subcluster”), the following information is listed:  
1387 gene symbol (“Gene name”); gene Ensembl ID (“Gene ID”); the false detection rate (one-sided likelihood  
1388 ratio test with adjustment for multiple comparisons) for the differential expression test across conditions  
1389 (“Q-value”); fold change between the max expressed group and second expressed group (“Fold change”);  
1390 expression level quantified by transcripts per million in the max group (“TPM in max condition”); the  
1391 condition where the max expression was detected (“Max condition”). Only significant genes are listed in  
1392 the table, which is defined by Q-value < 0.05, Fold change > 2 and TPM in max condition > 50.

1393 **Supplementary Table 12:** Differentially expressed genes between wild-type and LOAD model  
1394 (APOE\*4/Trem2\*R47H) for all sub-clusters. For each subcluster in the dataset (“Cell subcluster”), the  
1395 following information is listed: gene symbol (“Gene name”); gene Ensembl ID (“Gene ID”); the false  
1396 detection rate (one-sided likelihood ratio test with adjustment for multiple comparisons) for the differential  
1397 expression test across conditions (“Q-value”); fold change between the max expressed group and second  
1398 expressed group (“Fold change”); expression level quantified by transcripts per million in the max group  
1399 (“TPM in max condition”); the condition where the max expression was detected (“Max condition”). Only  
1400 significant genes are listed in the table, which is defined by Q-value < 0.05, Fold change > 2 and TPM  
1401 in max condition > 50.

1402 **Supplementary Table 13:** Metadata of human brain samples included in this study.

1403 **Supplementary Table 14:** Differentially expressed genes between control and AD human brain samples  
1404 for each main cell type in each region. For each main cell type (“Main cluster name”) in each region  
1405 (“Region”), the following information is listed: gene symbol (“Gene name”); the max and the second  
1406 expressed group (“Max condition”, “Second condition”) along with expression level quantified by transcripts  
1407 per million (“TPM in max condition”, “TPM in second condition”) and the fold change (“Fold change”); the



1408 false detection rate (one-sided likelihood ratio test with adjustment for multiple comparisons) for the  
1409 differential expression test across the two conditions (“Q-value”). Only significant genes are listed in the  
1410 table, which is defined by Q-value < 0.05, Fold change > 1.5 and TPM in max condition > 50.

#### 1411 **Supplementary files**

1412 **Supplementary file 1:** Detailed experiment protocols for *EasySci-RNA*, including all materials and  
1413 equipment needed, step-by-step descriptions, and representative gel images.

1414 **Supplementary file 2:** Primer sequences used in the *EasySci-RNA* experiment, including multiple plates  
1415 of short dT RT primers, random hexamer RT primers, ligation primers and P7 PCR primers. The columns  
1416 indicate the positions on the 96-well plate (Well position), an identifier of the sequence (Name), the full  
1417 primer sequence (Sequence) and the barcode sequence (Barcode).

1418 **Supplementary file 3:** Computational pipeline scripts and notes for processing *EasySci-RNA* data, from  
1419 sequencer-generated files to single-cell gene count matrix.

1420 **Supplementary file 4:** Detailed experiment protocols for *EasySci-ATAC*, including all materials and  
1421 equipment needed, step-by-step descriptions, and representative gel images.

1422 **Supplementary file 5:** Primer sequences used in the *EasySci-ATAC* experiment, including N5/N7 oligos  
1423 used in indexed Tn5 assembly, ligation primers and P7 PCR primers. The columns indicate the positions  
1424 on the 96-well plate (Well position), an identifier of the sequence (Name), the full primer sequence  
1425 (Sequence) and the barcode sequence (Barcode).

1426 **Supplementary file 6:** Computational pipeline scripts and notes for processing *EasySci-ATAC* data, from  
1427 sequencer-generated files to single-cell read files.

1428

1429 **Reference:**

- 1430 Anders, S., Pyl, P.T., and Huber, W. (2015). HTSeq--a Python framework to work with high-throughput  
1431 sequencing data. *Bioinformatics* 31, 166–169.
- 1432 Arawaka, S., Machiya, Y., and Kato, T. (2010). Heat shock proteins as suppressors of accumulation of  
1433 toxic prefibrillar intermediates and misfolded proteins in neurodegenerative diseases. *Curr. Pharm.*  
1434 *Biotechnol.* 11, 158–166.
- 1435 Attwood, M.M., and Schiöth, H.B. (2021). Characterization of Five Transmembrane Proteins: With Focus  
1436 on the Tweety, Sideroflexin, and YIP1 Domain Families. *Front Cell Dev Biol* 9, 708754.
- 1437 Baranger, K., Marchalant, Y., Bonnet, A.E., Crouzin, N., Carrete, A., Paumier, J.-M., Py, N.A., Bernard,  
1438 A., Bauer, C., Charrat, E., et al. (2016). MT5-MMP is a new pro-amyloidogenic proteinase that promotes  
1439 amyloid pathology and cognitive decline in a transgenic mouse model of Alzheimer’s disease. *Cell. Mol.*  
1440 *Life Sci.* 73, 217–236.
- 1441 Barraud, P., Seferiadis, A.A., Tyson, L.D., Zwart, M.F., Szabo-Rogers, H.L., Ruhrberg, C., Liu, K.J., and  
1442 Baker, C.V.H. (2010). Neural crest origin of olfactory ensheathing glia. *Proc. Natl. Acad. Sci. U. S. A.*  
1443 107, 21040–21045.
- 1444 Blondel, V.D., Guillaume, J.-L., Lambiotte, R., and Lefebvre, E. (2008). Fast unfolding of communities in  
1445 large networks. *Journal of Statistical Mechanics: Theory and Experiment* 2008, P10008.  
1446 <https://doi.org/10.1088/1742-5468/2008/10/p10008>.
- 1447 Bommer, G.T., and MacDougald, O.A. (2011). Regulation of lipid homeostasis by the bifunctional  
1448 SREBF2-miR33a locus. *Cell Metab.* 13, 241–247.
- 1449 Boeshaghi, A.S., Yao, Z., van Velthoven, C., Smith, K., Tasic, B., Zeng, H., and Pachter, L. (2021).  
1450 Isoform cell-type specificity in the mouse primary motor cortex. *Nature* 598, 195–199. .
- 1451 Bray, N.L., Pimentel, H., Melsted, P., and Pachter, L. (2016). Near-optimal probabilistic RNA-seq  
1452 quantification. *Nat. Biotechnol.* 34, 525–527.
- 1453 Broad Institute (2019). Picard toolkit. Broad Institute, GitHub Repository.
- 1454 Campbell, J.N., Macosko, E.Z., Fenselau, H., Pers, T.H., Lyubetskaya, A., Tenen, D., Goldman, M.,  
1455 Verstegen, A.M.J., Resch, J.M., McCarroll, S.A., et al. (2017). A molecular census of arcuate  
1456 hypothalamus and median eminence cell types. *Nat. Neurosci.* 20, 484–496.
- 1457 Cao, J., Packer, J.S., Ramani, V., Cusanovich, D.A., Huynh, C., Daza, R., Qiu, X., Lee, C., Furlan, S.N.,  
1458 Steemers, F.J., et al. (2017). Comprehensive single-cell transcriptional profiling of a multicellular  
1459 organism. *Science* 357, 661–667.
- 1460 Cao, J., Cusanovich, D.A., Ramani, V., Aghamirzaie, D., Pliner, H.A., Hill, A.J., Daza, R.M., McFaline-  
1461 Figueroa, J.L., Packer, J.S., Christiansen, L., et al. (2018). Joint profiling of chromatin accessibility and  
1462 gene expression in thousands of single cells. *Science* 361, 1380–1385.
- 1463 Cao, J., Spielmann, M., Qiu, X., Huang, X., Ibrahim, D.M., Hill, A.J., Zhang, F., Mundlos, S.,  
1464 Christiansen, L., Steemers, F.J., et al. (2019). The single-cell transcriptional landscape of mammalian  
1465 organogenesis. *Nature* 566, 496–502.
- 1466 Cao, J., O’Day, D.R., Pliner, H.A., Kingsley, P.D., Deng, M., Daza, R.M., Zager, M.A., Aldinger, K.A.,  
1467 Blecher-Gonen, R., Zhang, F., et al. (2020). A human cell atlas of fetal gene expression. *Science* 370.

- 1468 <https://doi.org/10.1126/science.aba7721>.
- 1469 Cavalcante, G.C., Brito, L.M., Schaan, A.P., Ribeiro-Dos-Santos, Â., de Araújo, G.S., and On Behalf Of  
1470 Alzheimer's Disease Neuroimaging Initiative (2022). Mitochondrial Genetics Reinforces Multiple Layers  
1471 of Interaction in Alzheimer's Disease. *Biomedicines* 10. <https://doi.org/10.3390/biomedicines10040880>.
- 1472 Cooper, W.N., Hesson, L.B., Matallanas, D., Dallol, A., von Kriegsheim, A., Ward, R., Kolch, W., and  
1473 Latif, F. (2009). RASSF2 associates with and stabilizes the proapoptotic kinase MST2. *Oncogene* 28,  
1474 2988–2998.
- 1475 Corces, M.R., Granja, J.M., Shams, S., Louie, B.H., Seoane, J.A., Zhou, W., Silva, T.C., Groeneveld, C.,  
1476 Wong, C.K., Cho, S.W., et al. (2018). The chromatin accessibility landscape of primary human cancers.  
1477 *Science* 362. <https://doi.org/10.1126/science.aav1898>.
- 1478 Cornejo, V.H., and Hetz, C. (2013). The unfolded protein response in Alzheimer's disease. *Semin.*  
1479 *Immunopathol.* 35, 277–292.
- 1480 Cusanovich, D.A., Hill, A.J., Aghamirzaie, D., Daza, R.M., Pliner, H.A., Berletch, J.B., Filippova, G.N.,  
1481 Huang, X., Christiansen, L., DeWitt, W.S., et al. (2018). A Single-Cell Atlas of In Vivo Mammalian  
1482 Chromatin Accessibility. *Cell* 174, 1309–1324.e18.
- 1483 Desimone, A., Hong, J., Brockie, S.T., Yu, W., Laliberte, A.M., and Fehlings, M.G. (2021). The influence  
1484 of ApoE4 on the clinical outcomes and pathophysiology of degenerative cervical myelopathy. *JCI Insight*  
1485 6. <https://doi.org/10.1172/jci.insight.149227>.
- 1486 Di Giorgio, E., Paluvai, H., Dalla, E., Ranzino, L., Renzini, A., Moresi, V., Minisini, M., Picco, R., and  
1487 Brancolini, C. (2021). HDAC4 degradation during senescence unleashes an epigenetic program driven  
1488 by AP-1/p300 at selected enhancers and super-enhancers. *Genome Biol.* 22, 129.
- 1489 Ding, J., Adiconis, X., Simmons, S.K., Kowalczyk, M.S., Hession, C.C., Marjanovic, N.D., Hughes, T.K.,  
1490 Wadsworth, M.H., Burks, T., Nguyen, L.T., et al. (2020). Systematic comparison of single-cell and single-  
1491 nucleus RNA-sequencing methods. *Nat. Biotechnol.* 38, 737–746.
- 1492 Dobin, A., Davis, C.A., Schlesinger, F., Drenkow, J., Zaleski, C., Jha, S., Batut, P., Chaisson, M., and  
1493 Gingeras, T.R. (2013). STAR: ultrafast universal RNA-seq aligner. *Bioinformatics* 29, 15–21.
- 1494 Domcke, S., Hill, A.J., Daza, R.M., Cao, J., O'Day, D.R., Pliner, H.A., Aldinger, K.A., Pokholok, D.,  
1495 Zhang, F., Milbank, J.H., et al. (2020). A human cell atlas of fetal chromatin accessibility. *Science* 370.  
1496 <https://doi.org/10.1126/science.aba7612>.
- 1497 Erö, C., Gewaltig, M.-O., Keller, D., and Markram, H. (2018). A Cell Atlas for the Mouse Brain. *Front.*  
1498 *Neuroinform.* 12, 84.
- 1499 Fang, R., Preissl, S., Li, Y., Hou, X., Lucero, J., Wang, X., Motamedi, A., Shiau, A.K., Zhou, X., Xie, F., et  
1500 al. (2021). Comprehensive analysis of single cell ATAC-seq data with SnapATAC. *Nat. Commun.* 12,  
1501 1337.
- 1502 de Faria, O., Jr, Dhaunchak, A.S., Kamen, Y., Roth, A.D., Kuhlmann, T., Colman, D.R., and Kennedy,  
1503 T.E. (2019). TMEM10 Promotes Oligodendrocyte Differentiation and is Expressed by Oligodendrocytes  
1504 in Human Remyelinating Multiple Sclerosis Plaques. *Sci. Rep.* 9, 3606.
- 1505 Genomics, 10x (2019a). Mouse Brain Section (Coronal).
- 1506 Genomics, 10x (2019b). Mouse Brain Serial Section 1 (Sagittal-Posterior).

- 1507 Genomics, 10x (2019c). Mouse Brain Serial Section 1 (Sagittal-Anterior).
- 1508 Graham, V., Khudyakov, J., Ellis, P., and Pevny, L. (2003). SOX2 functions to maintain neural progenitor  
1509 identity. *Neuron* 39, 749–765.
- 1510 Hashimoto, Y., Niikura, T., Tajima, H., Yasukawa, T., Sudo, H., Ito, Y., Kita, Y., Kawasumi, M., Kouyama,  
1511 K., Doyu, M., et al. (2001). A rescue factor abolishing neuronal cell death by a wide spectrum of familial  
1512 Alzheimer's disease genes and Abeta. *Proc. Natl. Acad. Sci. U. S. A.* 98, 6336–6341.
- 1513 Herring, A., Donath, A., Steiner, K.M., Widera, M.P., Hamzehian, S., Kanakis, D., Kölbl, K., ElAli, A.,  
1514 Hermann, D.M., Paulus, W., et al. (2012). Reelin depletion is an early phenomenon of Alzheimer's  
1515 pathology. *J. Alzheimers. Dis.* 30, 963–979.
- 1516 Hüttenrauch, M., Ogorek, I., Klafki, H., Otto, M., Stadelmann, C., Weggen, S., Wiltfang, J., and Wirths, O.  
1517 (2018). Glycoprotein NMB: a novel Alzheimer's disease associated marker expressed in a subset of  
1518 activated microglia. *Acta Neuropathol Commun* 6, 108.
- 1519 Karch, C.M., and Goate, A.M. (2015). Alzheimer's disease risk genes and mechanisms of disease  
1520 pathogenesis. *Biol. Psychiatry* 77, 43–51.
- 1521 Kenigsbuch, M., Bost, P., Halevi, S., Chang, Y., Chen, S., Ma, Q., Hajbi, R., Schwikowski, B.,  
1522 Bodenmiller, B., Fu, H., et al. (2022). A shared disease-associated oligodendrocyte signature among  
1523 multiple CNS pathologies. *Nat. Neurosci.* 25, 876–886.
- 1524 Keren-Shaul, H., Spinrad, A., Weiner, A., Matcovitch-Natan, O., Dvir-Szternfeld, R., Ulland, T.K., David,  
1525 E., Baruch, K., Lara-Astaiso, D., Toth, B., et al. (2017). A Unique Microglia Type Associated with  
1526 Restricting Development of Alzheimer's Disease. *Cell* 169, 1276–1290.e17.  
1527 <https://doi.org/10.1016/j.cell.2017.05.018>.
- 1528 Kleshchevnikov, V., Shmatko, A., Dann, E., Aivazidis, A., King, H.W., Li, T., Elmentaite, R., Lomakin, A.,  
1529 Kedlian, V., Gayoso, A., et al. (2022). Cell2location maps fine-grained cell types in spatial  
1530 transcriptomics. *Nat. Biotechnol.* 1–11.
- 1531 Kotredes, K.P., Oblak, A., Pandey, R.S., Lin, P.B.-C., Garceau, D., Williams, H., Uyar, A., O'Rourke, R.,  
1532 O'Rourke, S., Ingraham, C., et al. (2021). Uncovering Disease Mechanisms in a Novel Mouse Model  
1533 Expressing Humanized APOE $\epsilon$ 4 and Trem2<sup>\*R47H</sup>. *Front. Aging Neurosci.* 13, 735524.
- 1534 Kozareva, V., Martin, C., Osorno, T., Rudolph, S., Guo, C., Vanderburg, C., Nadaf, N., Regev, A.,  
1535 Regehr, W.G., and Macosko, E. (2021). A transcriptomic atlas of mouse cerebellar cortex  
1536 comprehensively defines cell types. *Nature* 598, 214–219.
- 1537 Krueger, F., James, F., Ewels, P., Afyounian, E., and Schuster-Boeckler, B. (2021). GitHub -  
1538 FelixKrueger/TrimGalore: A wrapper around Cutadapt and FastQC to consistently apply adapter and  
1539 quality trimming to FastQ files, with extra functionality for RRBS data.  
1540 <https://doi.org/10.5281/zenodo.5127899>.
- 1541 Kuleshov, M.V., Jones, M.R., Rouillard, A.D., Fernandez, N.F., Duan, Q., Wang, Z., Koplev, S., Jenkins,  
1542 S.L., Jagodnik, K.M., Lachmann, A., et al. (2016). Enrichr: a comprehensive gene set enrichment  
1543 analysis web server 2016 update. *Nucleic Acids Res.* 44, W90–W97.
- 1544 Kulijewicz-Nawrot, M., Syková, E., Chvátal, A., Verkhatsky, A., and Rodríguez, J.J. (2013). Astrocytes  
1545 and glutamate homeostasis in Alzheimer's disease: a decrease in glutamine synthetase, but not in  
1546 glutamate transporter-1, in the prefrontal cortex. *ASN Neuro* 5, 273–282.

- 1547 Kumar, A., Pareek, V., Faiq, M.A., Kumar, P., Kumari, C., Singh, H.N., and Ghosh, S.K. (2020).  
1548 Transcriptomic analysis of the signature of neurogenesis in human hippocampus suggests restricted  
1549 progenitor cell progression post-childhood. *IBRO Rep* 9, 224–232.
- 1550 Li, H., Handsaker, B., Wysoker, A., Fennell, T., Ruan, J., Homer, N., Marth, G., Abecasis, G., Durbin, R.,  
1551 and 1000 Genome Project Data Processing Subgroup (2009). The Sequence Alignment/Map format and  
1552 SAMtools. *Bioinformatics* 25, 2078–2079.
- 1553 Li, J., Wang, C., Zhang, Z., Wen, Y., An, L., Liang, Q., Xu, Z., Wei, S., Li, W., Guo, T., et al. (2018).  
1554 Transcription Factors Sp8 and Sp9 Coordinately Regulate Olfactory Bulb Interneuron Development.  
1555 *Cereb. Cortex* 28, 3278–3294.
- 1556 Lin, Y., Wu, T.-Y., Wan, S., Yang, J.Y.H., Wong, W.H., and Wang, Y.X.R. (2022). scJoint integrates  
1557 atlas-scale single-cell RNA-seq and ATAC-seq data with transfer learning. *Nat. Biotechnol.* 40, 703–710.
- 1558 Liu, J., Lin, C., Gleiberman, A., Ohgi, K.A., Herman, T., Huang, H.P., Tsai, M.J., and Rosenfeld, M.G.  
1559 (2001). Tbx19, a tissue-selective regulator of POMC gene expression. *Proc. Natl. Acad. Sci. U. S. A.* 98,  
1560 8674–8679.
- 1561 Liu, X.-F., Hao, J.-L., Xie, T., Malik, T.H., Lu, C.-B., Liu, C., Shu, C., Lu, C.-W., and Zhou, D.-D. (2017).  
1562 Nrf2 as a target for prevention of age-related and diabetic cataracts by against oxidative stress. *Aging*  
1563 *Cell* 16, 934–942.
- 1564 Luo, J., Huang, X., Li, R., Xie, J., Chen, L., Zou, C., Pei, Z., Mao, Y., and Zou, D. (2022). PTPRG  
1565 activates m6A methyltransferase VIRMA to block mitochondrial autophagy mediated neuronal death in  
1566 Alzheimer's disease.
- 1567 Ma, S., Zhang, B., LaFave, L.M., Earl, A.S., Chiang, Z., Hu, Y., Ding, J., Brack, A., Kartha, V.K., Tay, T.,  
1568 et al. (2020). Chromatin Potential Identified by Shared Single-Cell Profiling of RNA and Chromatin. *Cell*  
1569 <https://doi.org/10.1016/j.cell.2020.09.056>.
- 1570 Marques, S., van Bruggen, D., Vanichkina, D.P., Floriddia, E.M., Munguba, H., Våremo, L., Giacomello,  
1571 S., Falcão, A.M., Meijer, M., Björklund, Å.K., et al. (2018). Transcriptional Convergence of  
1572 Oligodendrocyte Lineage Progenitors during Development. *Dev. Cell* 46, 504–517.e7.
- 1573 Martin, B.K., Qiu, C., Nichols, E., Phung, M., Green-Gladden, R., Srivatsan, S., Blecher-Gonen, R.,  
1574 Beliveau, B.J., Trapnell, C., Cao, J., et al. (2021). An optimized protocol for single cell transcriptional  
1575 profiling by combinatorial indexing. <https://doi.org/10.48550/arXiv.2110.15400>.
- 1576 Mathys, H., Davila-Velderrain, J., Peng, Z., Gao, F., Mohammadi, S., Young, J.Z., Menon, M., He, L.,  
1577 Abdurrob, F., Jiang, X., et al. (2019). Single-cell transcriptomic analysis of Alzheimer's disease. *Nature*  
1578 570, 332–337.
- 1579 Mays, J.C., Kelly, M.C., Coon, S.L., Holtzclaw, L., Rath, M.F., Kelley, M.W., and Klein, D.C. (2018).  
1580 Single-cell RNA sequencing of the mammalian pineal gland identifies two pinealocyte subtypes and cell  
1581 type-specific daily patterns of gene expression. *PLoS One* 13, e0205883.
- 1582 McEvelly, R.J., Erkman, L., Luo, L., Sawchenko, P.E., Ryan, A.F., and Rosenfeld, M.G. (1996).  
1583 Requirement for Brn-3.0 in differentiation and survival of sensory and motor neurons. *Nature* 384, 574–  
1584 577.
- 1585 McInnes, L. (2018). UMAP: Uniform Manifold Approximation and Projection for Dimension Reduction —  
1586 [umap 0.5 documentation, https://umap-learn.readthedocs.io/en/latest/](https://umap-learn.readthedocs.io/en/latest/).



- 1587 McInnes, L., Healy, J., Saul, N., and Großberger, L. (2018). UMAP: Uniform Manifold Approximation and  
1588 Projection. *Journal of Open Source Software* 3, 861. <https://doi.org/10.21105/joss.00861>.
- 1589 Melsted, P., Sina Boeshaghi, A., Liu, L., Gao, F., Lu, L., Min, K.H. (joseph), da Veiga Beltrame, E.,  
1590 Hjörleifsson, K.E., Gehring, J., and Pachter, L. (2021). Modular, efficient and constant-memory single-cell  
1591 RNA-seq preprocessing. *Nat. Biotechnol.* 1–6.
- 1592 Mielke, M.M., and Lyketsos, C.G. (2010). Alterations of the sphingolipid pathway in Alzheimer’s disease:  
1593 new biomarkers and treatment targets? *Neuromolecular Med.* 12, 331–340.
- 1594 Monavarfeshani, A., Knill, C.N., Sabbagh, U., Su, J., and Fox, M.A. (2017). Region- and Cell-Specific  
1595 Expression of Transmembrane Collagens in Mouse Brain. *Front. Integr. Neurosci.* 11, 20.
- 1596 Morabito, S., Miyoshi, E., Michael, N., Shahin, S., Martini, A.C., Head, E., Silva, J., Leavy, K., Perez-  
1597 Rosendahl, M., and Swarup, V. (2021). Single-nucleus chromatin accessibility and transcriptomic  
1598 characterization of Alzheimer’s disease. *Nature Genetics* 53, 1143–1155. <https://doi.org/10.1038/s41588-021-00894-z>.  
1599
- 1600 Neff, R.A., Wang, M., Vatansever, S., Guo, L., Ming, C., Wang, Q., Wang, E., Horgusluoglu-Moloch, E.,  
1601 Song, W.-M., Li, A., et al. (2021). Molecular subtyping of Alzheimer’s disease using RNA sequencing  
1602 data reveals novel mechanisms and targets. *Sci Adv* 7. <https://doi.org/10.1126/sciadv.abb5398>.
- 1603 Niccolini, F., Haider, S., Reis Marques, T., Muhlert, N., Tziortzi, A.C., Searle, G.E., Natesan, S., Piccini,  
1604 P., Kapur, S., Rabiner, E.A., et al. (2015a). Altered PDE10A expression detectable early before  
1605 symptomatic onset in Huntington’s disease. *Brain* 138, 3016–3029.
- 1606 Niccolini, F., Foltynie, T., Reis Marques, T., Muhlert, N., Tziortzi, A.C., Searle, G.E., Natesan, S., Kapur,  
1607 S., Rabiner, E.A., Gunn, R.N., et al. (2015b). Loss of phosphodiesterase 10A expression is associated  
1608 with progression and severity in Parkinson’s disease. *Brain* 138, 3003–3015.
- 1609 Oakley, H., Cole, S.L., Logan, S., Maus, E., Shao, P., Craft, J., Guillozet-Bongaarts, A., Ohno, M.,  
1610 Disterhoft, J., Van Eldik, L., et al. (2006). Intraneuronal beta-amyloid aggregates, neurodegeneration,  
1611 and neuron loss in transgenic mice with five familial Alzheimer’s disease mutations: potential factors in  
1612 amyloid plaque formation. *J. Neurosci.* 26, 10129–10140.
- 1613 Oeckinghaus, A., and Ghosh, S. (2009). The NF-kappaB family of transcription factors and its regulation.  
1614 *Cold Spring Harb. Perspect. Biol.* 1, a000034.
- 1615 Paillasse, M.R., and de Medina, P. (2015). The NR4A nuclear receptors as potential targets for anti-  
1616 aging interventions. *Med. Hypotheses* 84, 135–140.
- 1617 Pastrana, E., Cheng, L.-C., and Doetsch, F. (2009). Simultaneous prospective purification of adult  
1618 subventricular zone neural stem cells and their progeny. *Proc. Natl. Acad. Sci. U. S. A.* 106, 6387–6392.
- 1619 Puverel, S., Nakatani, H., Parras, C., and Soussi-Yanicostas, N. (2009). Prokineticin receptor 2  
1620 expression identifies migrating neuroblasts and their subventricular zone transient-amplifying progenitors  
1621 in adult mice. *J. Comp. Neurol.* 512, 232–242.
- 1622 Qiu, X., Mao, Q., Tang, Y., Wang, L., Chawla, R., Pliner, H.A., and Trapnell, C. (2017). Reversed graph  
1623 embedding resolves complex single-cell trajectories. *Nat. Methods* 14, 979–982.
- 1624 Quinlan, A.R., and Hall, I.M. (2010). BEDTools: a flexible suite of utilities for comparing genomic  
1625 features. *Bioinformatics* 26, 841–842.

- 1626 Rodriguez, A., and Laio, A. (2014). Machine learning. Clustering by fast search and find of density peaks.  
1627 *Science* *344*, 1492–1496.
- 1628 Rosenberg, A.B., Roco, C.M., Muscat, R.A., Kuchina, A., Sample, P., Yao, Z., Graybuck, L.T., Peeler,  
1629 D.J., Mukherjee, S., Chen, W., et al. (2018). Single-cell profiling of the developing mouse brain and  
1630 spinal cord with split-pool barcoding. *Science* *360*, 176–182.
- 1631 Schep, A. (2017). motifmatchr: Fast Motif Matching in R, <https://github.com/GreenleafLab/motifmatchr/>.
- 1632 Schep, A.N., Wu, B., Buenrostro, J.D., and Greenleaf, W.J. (2017). chromVAR: inferring transcription-  
1633 factor-associated accessibility from single-cell epigenomic data. *Nat. Methods* *14*, 975–978.
- 1634 Schmidt, L.S., and Linehan, W.M. (2018). FLCN: The causative gene for Birt-Hogg-Dubé syndrome.  
1635 *Gene* *640*, 28–42.
- 1636 See, A.P., Han, J.E., Phallen, J., Binder, Z., Gallia, G., Pan, F., Jinasena, D., Jackson, C., Belcaid, Z.,  
1637 Jeong, S.J., et al. (2012). The role of STAT3 activation in modulating the immune microenvironment of  
1638 GBM. *J. Neurooncol.* *110*, 359–368.
- 1639 Seripa, D., Matera, M.G., Franceschi, M., Daniele, A., Bizzarro, A., Rinaldi, M., Panza, F., Fazio, V.M.,  
1640 Gravina, C., D’Onofrio, G., et al. (2008). The RELN locus in Alzheimer’s disease. *J. Alzheimers. Dis.* *14*,  
1641 335–344.
- 1642 Silva, I., Silva, J., Ferreira, R., and Trigo, D. (2021). Glymphatic system, AQP4, and their implications in  
1643 Alzheimer’s disease. *Neurol Res Pract* *3*, 5.
- 1644 Sokolowski, J.D., Nobles, S.L., Heffron, D.S., Park, D., Ravichandran, K.S., and Mandell, J.W. (2011).  
1645 Brain-specific angiogenesis inhibitor-1 expression in astrocytes and neurons: implications for its dual  
1646 function as an apoptotic engulfment receptor. *Brain Behav. Immun.* *25*, 915–921.
- 1647 Stuart, T., Butler, A., Hoffman, P., Hafemeister, C., Papalexi, E., Mauck, W.M., 3rd, Hao, Y., Stoeckius,  
1648 M., Smibert, P., and Satija, R. (2019). Comprehensive Integration of Single-Cell Data. *Cell* *177*, 1888–  
1649 1902.e21.
- 1650 Stuart, T., Srivastava, A., Madad, S., Lareau, C.A., and Satija, R. (2021). Single-cell chromatin state  
1651 analysis with Signac. *Nat. Methods* *18*, 1333–1341.
- 1652 Tabula Muris Consortium (2020). A single-cell transcriptomic atlas characterizes ageing tissues in the  
1653 mouse. *Nature* *583*, 590–595.
- 1654 Tepe, B., Hill, M.C., Pekarek, B.T., Hunt, P.J., Martin, T.J., Martin, J.F., and Arenkiel, B.R. (2018).  
1655 Single-Cell RNA-Seq of Mouse Olfactory Bulb Reveals Cellular Heterogeneity and Activity-Dependent  
1656 Molecular Census of Adult-Born Neurons. *Cell Rep.* *25*, 2689–2703.e3.
- 1657 Tong, Y., Xu, Y., Scearce-Levie, K., Ptáček, L.J., and Fu, Y.-H. (2010). COL25A1 triggers and promotes  
1658 Alzheimer’s disease-like pathology in vivo. *Neurogenetics* *11*, 41–52.
- 1659 Tufo, C., Poopalasundaram, S., Dorrego-Rivas, A., Ford, M.C., Graham, A., and Grubb, M.S. (2022).  
1660 Development of the mammalian main olfactory bulb. *Development* *149*.  
1661 <https://doi.org/10.1242/dev.200210>.
- 1662 Volkert, M.R., and Crowley, D.J. (2020). Preventing Neurodegeneration by Controlling Oxidative Stress:  
1663 The Role of OXR1. *Front. Neurosci.* *14*, 611904.

- 1664 Wang, R., Zhang, P., Wang, J., Ma, L., E, W., Suo, S., Jiang, M., Li, J., Chen, H., Sun, H., et al. (2022).  
1665 Construction of a cross-species cell landscape at single-cell level. *Nucleic Acids Res.*  
1666 <https://doi.org/10.1093/nar/gkac633>.
- 1667 Watakabe, A., Ichinohe, N., Ohsawa, S., Hashikawa, T., Komatsu, Y., Rockland, K.S., and Yamamori, T.  
1668 (2007). Comparative analysis of layer-specific genes in Mammalian neocortex. *Cereb. Cortex* *17*, 1918–  
1669 1933.
- 1670 Weirauch, M.T., Yang, A., Albu, M., Cote, A.G., Montenegro-Montero, A., Drewe, P., Najafabadi, H.S.,  
1671 Lambert, S.A., Mann, I., Cook, K., et al. (2014). Determination and inference of eukaryotic transcription  
1672 factor sequence specificity. *Cell* *158*, 1431–1443.
- 1673 Wolock, S.L., Lopez, R., and Klein, A.M. (2019). Scrublet: Computational Identification of Cell Doublets in  
1674 Single-Cell Transcriptomic Data. *Cell Syst* *8*, 281–291.e9.
- 1675 Xia, X., Jiang, Q., McDermott, J., and Han, J.-D.J. (2018). Aging and Alzheimer’s disease: Comparison  
1676 and associations from molecular to system level. *Aging Cell* *17*, e12802.
- 1677 Xiang, X., Piers, T.M., Wefers, B., Zhu, K., Mallach, A., Brunner, B., Kleinberger, G., Song, W., Colonna,  
1678 M., Herms, J., et al. (2018). The Trem2 R47H Alzheimer’s risk variant impairs splicing and reduces  
1679 Trem2 mRNA and protein in mice but not in humans. *Mol. Neurodegener.* *13*, 49.
- 1680 Ximerakis, M., Lipnick, S.L., Innes, B.T., Simmons, S.K., Adiconis, X., Dionne, D., Mayweather, B.A.,  
1681 Nguyen, L., Niziolek, Z., Ozek, C., et al. (2019). Single-cell transcriptomic profiling of the aging mouse  
1682 brain. *Nat. Neurosci.* *22*, 1696–1708.
- 1683 Yao, Z., Liu, H., Xie, F., Fischer, S., Adkins, R.S., Aldridge, A.I., Ament, S.A., Bartlett, A., Behrens, M.M.,  
1684 Van den Berge, K., et al. (2021). A transcriptomic and epigenomic cell atlas of the mouse primary motor  
1685 cortex. *Nature* *598*, 103–110.
- 1686 Yeh, H., and Ikezu, T. (2019). Transcriptional and Epigenetic Regulation of Microglia in Health and  
1687 Disease. *Trends Mol. Med.* *25*, 96–111.
- 1688 Zeisel, A., Hochgerner, H., Lönnerberg, P., Johnsson, A., Memic, F., van der Zwan, J., Häring, M.,  
1689 Braun, E., Borm, L.E., La Manno, G., et al. (2018). Molecular Architecture of the Mouse Nervous System.  
1690 *Cell* *174*, 999–1014.e22.
- 1691 Zhang, K. (2022). SnapATAC2: Single Nucleus Analysis Pipeline for ATAC-seq — SnapATAC2 2.0.0  
1692 documentation, <https://kzhang.org/SnapATAC2/index.html>.
- 1693 Zhang, Y., and Wang, P. (2018). Age-Related Increase of Insulin-Degrading Enzyme Is Inversely  
1694 Correlated with Cognitive Function in APP<sup>swe</sup>/PS1<sup>dE9</sup> Mice. *Med. Sci. Monit.* *24*, 2446–2455.
- 1695 Zhang, Y., Liu, T., Meyer, C.A., Eeckhoute, J., Johnson, D.S., Bernstein, B.E., Nusbaum, C., Myers,  
1696 R.M., Brown, M., Li, W., et al. (2008). Model-based analysis of ChIP-Seq (MACS). *Genome Biol.* *9*,  
1697 R137.
- 1698 Zhang, Y., Chen, K., Sloan, S.A., Bennett, M.L., Scholze, A.R., O’Keefe, S., Phatnani, H.P., Guarnieri,  
1699 P., Caneda, C., Ruderisch, N., et al. (2014). An RNA-sequencing transcriptome and splicing database of  
1700 glia, neurons, and vascular cells of the cerebral cortex. *J. Neurosci.* *34*, 11929–11947.
- 1701 Zheng, G.X.Y., Terry, J.M., Belgrader, P., Ryvkin, P., Bent, Z.W., Wilson, R., Ziraldo, S.B., Wheeler,  
1702 T.D., McDermott, G.P., Zhu, J., et al. (2017). Massively parallel digital transcriptional profiling of single  
1703 cells. *Nat. Commun.* *8*, 14049.

- 1704 Zhou, Y., Song, W.M., Andhey, P.S., Swain, A., Levy, T., Miller, K.R., Poliani, P.L., Cominelli, M., Grover,  
1705 S., Gilfillan, S., et al. (2020). Human and mouse single-nucleus transcriptomics reveal TREM2-  
1706 dependent and TREM2-independent cellular responses in Alzheimer’s disease. *Nat. Med.* 26, 131–142.
- 1707 Zipfel, P., Rochais, C., Baranger, K., Rivera, S., and Dallemagne, P. (2020). Matrix Metalloproteinases  
1708 as New Targets in Alzheimer’s Disease: Opportunities and Challenges. *J. Med. Chem.* 63, 10705–  
1709 10725.
